# Supplementary material for: Transcriptome Analysis of Resistance to Fusarium Wilt in Mung Bean (Vigna radiata L.)
Source: Front Plant Sci. 2021 Jun 17;12:679629. doi: 10.3389/fpls.2021.679629 (PMC8249807; doi:10.3389/fpls.2021.679629)
Supplement: Supplementary file 2 [file Data_Sheet_2.xlsx]

## Sheet: Supplementary Table 1
Supplementary Table 1 Primers used for qRT-PCR.
Gene	Primer Sequence (5’ to 3’)
Vradi08g19120	F	TCTCCGTCTCCCACTCCTTC
	R	ATTGGGGAAGTTAAGGGGCG
Vradi0410s00020	F	GGATCCGACCCAAACACCAA
	R	CCACTTCCTCCGATCACAGG
Vradi01g02480	F	TCCAGGACGCCTTCAACATG
	R	TTTCGCGGTTGTTGCTCATC
Vradi0361s00030	F	CGACGATCTTCTTTGGGCGA
	R	GTACACGTGTCCCTGATGCA
Vradi08g01790	F	TGAGGAAGAAGTGGACTGCG
	R	GAGTTCCCTGGATGAGCGAG
Vradi02g11650	F	AGAACTTGGACAGGGTTGGC
	R	TCACCTGTCAGCCCATTAGC
Vradi11g02190	F	TGACAATGCTGCTCCACTGT
	R	TCTGCGAACACTCCACATTCA
Vradi05g06080	F	GATGCTCGCTCTGCTCTCAT
	R	GGCCACAGTAAAAGACCCCA
Vradi07g05420	F	CTCTGGCTGGGATTGCTTGA
	R	CCAAGTTGCTGCATTGCTGT
Vradi05g15250	F	CCAAAGGCCATTTCGCTGTC
	R	GAAGAGGAGCAGCGGAAAGT
Vradi07g24460	F	ATGCATCCTTTTGACCGGGT
	R	GGCTGCCATTCTCGAGTCTT
Vradi0129s00230	F	TGAAATTCCACCTCCACGCC
	R	GGGTGTGTCTGAATCGGAGG
Vradi09g06520	F	TGTCAGGGATGAAGCGCTAG
	R	ATGTCGCCCTATTGCTACCG
Vradi03g01580	F	CCGGCTAAGGAGGGTAGGAT
	R	ACTCGGCATGTCTTTCAGGG
Vradi01g03400	F	CATTCCCAGTTGTTGCAGGC
	R	GATGAGGCCAGGCATGTACA
Vradi06g11350	F	GGCAGCCTCAGTTACCAGTT
	R	ATCATTCCCTTGCTTCGCCA
Vradi03g02580	F	TCCTCCCTCCATGTGACCAA
	R	GGCCATCCTTTGCTACCCTT
Vradi05g17540	F	GCAGGAACCTTTGAAGCTGG
	R	GGACCAAACTCTTCCTCCGG
Vradi10g07710	F	CATACTTCGAGCATGCACGC
	R	CATTACTTCCCCTGCCCCTG
Vradi03g02740	F	TGGCCCTGCATTCACATCAT
	R	CAAATCCTCCTTCGCCCAGT
Vradi06g06610	F	AGGCTTGCAAACGTCCTGTA
	R	AGGAGTGGCATCAAGTGGTG
Vradi08g01990	F	ATGGATCAGGGAGTGGTGGA
	R	CTCCTACCGTGATGTGGCAG
Vradi09g06980	F	TACTCACCGACGCTGCAAAT
	R	CCAGATCCTCCCATTCCCCA
Vradi08g07490	F	CCCCATGTGGCCAAATCTCT
	R	ATCAATCTCCATGGCCACCC
Vradi06g13360	F	CCAGGGCAAGGACAAACTTC
	R	TCTTTGGTTGGGATGCGGAA
Vradi03g01380	F	CGCGAACTGTCTCCGTTAGT
	R	TTCATCAGAGTGCCCCGAAC
Vradi0179s00080	F	CCGACCATCAAGCCGACATA
	R	CGTCCAGTTCCTCTTGCACT
CYP2	F	AGAAGGGAGTCGGTAGGAGC
	R	GCGTTCGCCATGGAGAGAAT

## Sheet: Supplementary Table 2
Supplementary Table 2 A statistical summary of clean reads in the transcriptomes of different samples.
Sample name	Replicate	Raw reads	Clean reads	clean bases(Gb)	Q20(%)	Q30(%)	GC content(%)	Total map	Unique map
R0	R0_1	44224624	42852328	6.43G	98.46	95.4	44.09	41440802 (96.71%)	40660211 (94.88%)
	R0_2	45637530	43783288	6.57G	98.44	95.33	43.7	42244688 (96.49%)	41402455 (94.56%)
	R0_3	41862018	40514348	6.08G	98.14	94.39	44.4	39051583 (96.39%)	38329554 (94.61%)
R1	R1_1	43272750	41837072	6.28G	98.52	95.52	43.87	39747102 (95.00%)	38900239 (92.98%)
	R1_2	42566076	41237840	6.19G	98.4	95.27	44.26	38857875 (94.23%)	38047325 (92.26%)
	R1_3	43735402	42394910	6.36G	98.77	96.05	44.3	40197317 (94.82%)	39385716 (92.90%)
R2	R2_1	40592774	39231322	5.88G	98.42	95.23	43.8	37394898 (95.32%)	36644608 (93.41%)
	R2_2	41194552	39819384	5.97G	98.36	95.13	44.2	38026801 (95.50%)	37332103 (93.75%)
	R2_3	42399688	41149678	6.17G	98.37	95.14	44	39552030 (96.12%)	38777329 (94.23%)
R3	R3_1	43221204	41642138	6.25G	98.47	95.43	43.88	39906765 (95.83%)	39111865 (93.92%)
	R3_2	41862134	40646434	6.10G	98.23	94.77	44.4	38764737 (95.37%)	38058840 (93.63%)
	R3_3	44301302	42759582	6.41G	98.29	94.89	44.15	40950017 (95.77%)	40182825 (93.97%)
R4	R4_1	42781804	41124988	6.17G	98.37	95.16	43.91	38938404 (94.68%)	38169278 (92.81%)
	R4_2	42044518	40867858	6.13G	98.44	95.32	44.21	39058600 (95.57%)	38320460 (93.77%)
	R4_3	47295068	45804914	6.87G	98.38	95.17	43.66	43134232 (94.17%)	42285634 (92.32%)
S0	S0_1	44762458	43200080	6.48G	98.21	94.71	43.55	41767813 (96.68%)	40947112 (94.78%)
	S0_2	45137584	43917234	6.59G	98.37	95.15	44.2	42354706 (96.44%)	41568275 (94.65%)
	S0_3	41427294	40119660	6.02G	98.43	95.32	43.97	38793905 (96.70%)	38013008 (94.75%)
S1	S1_1	47211370	45491592	6.82G	98.46	95.35	43.61	43066913 (94.67%)	42162502 (92.68%)
	S1_2	45155928	43932352	6.59G	98.39	95.18	44.26	41616584 (94.73%)	40740107 (92.73%)
	S1_3	42294114	40850900	6.13G	98.37	95.14	43.84	38850206 (95.10%)	38054187 (93.15%)
S2	S2_1	45653866	44097130	6.61G	98.46	95.33	43.99	41100282 (93.20%)	40260352 (91.30%)
	S2_2	42638902	41211116	6.18G	98.32	95.06	44.36	39120792 (94.93%)	38377053 (93.12%)
	S2_3	43770454	42223870	6.33G	98.37	95.1	43.92	40229706 (95.28%)	39405782 (93.33%)
S3	S3_1	45219418	43767868	6.57G	98.38	95.16	44.23	41813780 (95.54%)	41023055 (93.73%)
	S3_2	40928542	39629742	5.94G	98.41	95.26	44.29	38007757 (95.91%)	37279723 (94.07%)
	S3_3	46459870	44914158	6.74G	98.47	95.42	43.91	43088653 (95.94%)	42206679 (93.97%)
S4	S4_1	44424222	43143950	6.47G	98.53	95.52	44.42	40400815 (93.64%)	39626700 (91.85%)
	S4_2	40478522	39593026	5.94G	98.29	94.92	44.4	37527766 (94.78%)	36789851 (92.92%)
	S4_3	45748424	44043838	6.61G	98.37	95.11	43.8	41759938 (94.81%)	40899305 (92.86%)
R, The resistant line; S, The susceptible line; 0-4, 0 days post inoculation (dpi), 0.5 dpi, 1 dpi, 2 dpi and 4 dpi, respectively.

## Sheet: Supplementary Table 3
Supplementary Table 3 Pearson’s correlation coefficients (R2) of three biological replicates in the two cultivars.
	R0_1	R0_2	R0_3	R1_1	R1_2	R1_3	R2_1	R2_2	R2_3	R3_1	R3_2	R3_3	R4_1	R4_2	R4_3	S0_1	S0_2	S0_3	S1_1	S1_2	S1_3	S2_1	S2_2	S2_3	S3_1	S3_2	S3_3	S4_1	S4_2	S4_3
R0_1	1	0.938	0.977	0.836	0.865	0.861	0.832	0.908	0.916	0.89	0.915	0.929	0.884	0.865	0.878	0.895	0.905	0.927	0.813	0.812	0.843	0.821	0.87	0.88	0.863	0.863	0.869	0.702	0.711	0.777
R0_2	0.938	1	0.945	0.817	0.822	0.823	0.801	0.877	0.877	0.868	0.873	0.897	0.838	0.825	0.836	0.925	0.931	0.922	0.783	0.787	0.8	0.786	0.846	0.862	0.833	0.828	0.845	0.677	0.68	0.745
R0_3	0.977	0.945	1	0.826	0.863	0.854	0.82	0.907	0.904	0.886	0.91	0.924	0.864	0.847	0.856	0.895	0.913	0.925	0.805	0.808	0.83	0.804	0.869	0.872	0.86	0.86	0.864	0.683	0.696	0.759
R1_1	0.836	0.817	0.826	1	0.965	0.969	0.915	0.896	0.897	0.892	0.869	0.876	0.882	0.881	0.887	0.768	0.777	0.79	0.942	0.946	0.936	0.898	0.892	0.898	0.877	0.87	0.876	0.786	0.808	0.839
R1_2	0.865	0.822	0.863	0.965	1	0.979	0.911	0.913	0.908	0.903	0.896	0.895	0.894	0.887	0.888	0.781	0.788	0.814	0.937	0.939	0.946	0.898	0.902	0.898	0.894	0.888	0.892	0.772	0.8	0.835
R1_3	0.861	0.823	0.854	0.969	0.979	1	0.919	0.919	0.912	0.909	0.902	0.901	0.907	0.896	0.899	0.782	0.782	0.81	0.939	0.938	0.952	0.905	0.903	0.901	0.902	0.896	0.899	0.786	0.816	0.846
R2_1	0.832	0.801	0.82	0.915	0.911	0.919	1	0.914	0.909	0.913	0.888	0.89	0.924	0.916	0.926	0.747	0.765	0.766	0.881	0.888	0.895	0.945	0.901	0.9	0.906	0.915	0.892	0.863	0.896	0.91
R2_2	0.908	0.877	0.907	0.896	0.913	0.919	0.914	1	0.96	0.95	0.966	0.966	0.923	0.921	0.918	0.828	0.846	0.844	0.87	0.877	0.885	0.89	0.947	0.939	0.946	0.937	0.936	0.773	0.787	0.833
R2_3	0.916	0.877	0.904	0.897	0.908	0.912	0.909	0.96	1	0.942	0.943	0.943	0.939	0.942	0.942	0.827	0.832	0.859	0.872	0.859	0.887	0.902	0.931	0.938	0.924	0.919	0.92	0.804	0.805	0.86
R3_1	0.89	0.868	0.886	0.892	0.903	0.909	0.913	0.95	0.942	1	0.958	0.963	0.936	0.924	0.934	0.814	0.813	0.828	0.862	0.855	0.88	0.892	0.921	0.927	0.933	0.933	0.942	0.783	0.811	0.864
R3_2	0.915	0.873	0.91	0.869	0.896	0.902	0.888	0.966	0.943	0.958	1	0.976	0.929	0.925	0.922	0.836	0.845	0.856	0.843	0.849	0.872	0.87	0.926	0.918	0.942	0.935	0.939	0.761	0.778	0.829
R3_3	0.929	0.897	0.924	0.876	0.895	0.901	0.89	0.966	0.943	0.963	0.976	1	0.921	0.907	0.917	0.855	0.858	0.87	0.845	0.849	0.874	0.866	0.925	0.925	0.932	0.93	0.94	0.741	0.764	0.821
R4_1	0.884	0.838	0.864	0.882	0.894	0.907	0.924	0.923	0.939	0.936	0.929	0.921	1	0.966	0.978	0.786	0.787	0.812	0.862	0.849	0.885	0.905	0.888	0.896	0.908	0.91	0.907	0.845	0.862	0.909
R4_2	0.865	0.825	0.847	0.881	0.887	0.896	0.916	0.921	0.942	0.924	0.925	0.907	0.966	1	0.974	0.776	0.79	0.804	0.855	0.849	0.866	0.902	0.895	0.896	0.914	0.906	0.895	0.875	0.871	0.908
R4_3	0.878	0.836	0.856	0.887	0.888	0.899	0.926	0.918	0.942	0.934	0.922	0.917	0.978	0.974	1	0.781	0.788	0.807	0.858	0.85	0.878	0.906	0.889	0.898	0.905	0.907	0.898	0.861	0.87	0.915
S0_1	0.895	0.925	0.895	0.768	0.781	0.782	0.747	0.828	0.827	0.814	0.836	0.855	0.786	0.776	0.781	1	0.945	0.962	0.772	0.776	0.802	0.779	0.838	0.851	0.835	0.82	0.847	0.666	0.665	0.732
S0_2	0.905	0.931	0.913	0.777	0.788	0.782	0.765	0.846	0.832	0.813	0.845	0.858	0.787	0.79	0.788	0.945	1	0.941	0.777	0.806	0.797	0.788	0.865	0.865	0.846	0.84	0.84	0.689	0.685	0.742
S0_3	0.927	0.922	0.925	0.79	0.814	0.81	0.766	0.844	0.859	0.828	0.856	0.87	0.812	0.804	0.807	0.962	0.941	1	0.798	0.799	0.834	0.805	0.858	0.869	0.851	0.841	0.864	0.689	0.688	0.757
S1_1	0.813	0.783	0.805	0.942	0.937	0.939	0.881	0.87	0.872	0.862	0.843	0.845	0.862	0.855	0.858	0.772	0.777	0.798	1	0.952	0.954	0.914	0.903	0.913	0.894	0.886	0.895	0.803	0.826	0.863
S1_2	0.812	0.787	0.808	0.946	0.939	0.938	0.888	0.877	0.859	0.855	0.849	0.849	0.849	0.849	0.85	0.776	0.806	0.799	0.952	1	0.958	0.917	0.922	0.912	0.897	0.896	0.891	0.797	0.825	0.851
S1_3	0.843	0.8	0.83	0.936	0.946	0.952	0.895	0.885	0.887	0.88	0.872	0.874	0.885	0.866	0.878	0.802	0.797	0.834	0.954	0.958	1	0.932	0.917	0.921	0.911	0.911	0.921	0.8	0.832	0.874
S2_1	0.821	0.786	0.804	0.898	0.898	0.905	0.945	0.89	0.902	0.892	0.87	0.866	0.905	0.902	0.906	0.779	0.788	0.805	0.914	0.917	0.932	1	0.935	0.94	0.932	0.939	0.926	0.886	0.91	0.94
S2_2	0.87	0.846	0.869	0.892	0.902	0.903	0.901	0.947	0.931	0.921	0.926	0.925	0.888	0.895	0.889	0.838	0.865	0.858	0.903	0.922	0.917	0.935	1	0.976	0.964	0.965	0.96	0.813	0.827	0.871
S2_3	0.88	0.862	0.872	0.898	0.898	0.901	0.9	0.939	0.938	0.927	0.918	0.925	0.896	0.896	0.898	0.851	0.865	0.869	0.913	0.912	0.921	0.94	0.976	1	0.956	0.955	0.962	0.817	0.829	0.885
S3_1	0.863	0.833	0.86	0.877	0.894	0.902	0.906	0.946	0.924	0.933	0.942	0.932	0.908	0.914	0.905	0.835	0.846	0.851	0.894	0.897	0.911	0.932	0.964	0.956	1	0.977	0.972	0.837	0.855	0.891
S3_2	0.863	0.828	0.86	0.87	0.888	0.896	0.915	0.937	0.919	0.933	0.935	0.93	0.91	0.906	0.907	0.82	0.84	0.841	0.886	0.896	0.911	0.939	0.965	0.955	0.977	1	0.967	0.841	0.866	0.902
S3_3	0.869	0.845	0.864	0.876	0.892	0.899	0.892	0.936	0.92	0.942	0.939	0.94	0.907	0.895	0.898	0.847	0.84	0.864	0.895	0.891	0.921	0.926	0.96	0.962	0.972	0.967	1	0.798	0.824	0.882
S4_1	0.702	0.677	0.683	0.786	0.772	0.786	0.863	0.773	0.804	0.783	0.761	0.741	0.845	0.875	0.861	0.666	0.689	0.689	0.803	0.797	0.8	0.886	0.813	0.817	0.837	0.841	0.798	1	0.962	0.947
S4_2	0.711	0.68	0.696	0.808	0.8	0.816	0.896	0.787	0.805	0.811	0.778	0.764	0.862	0.871	0.87	0.665	0.685	0.688	0.826	0.825	0.832	0.91	0.827	0.829	0.855	0.866	0.824	0.962	1	0.962
S4_3	0.777	0.745	0.759	0.839	0.835	0.846	0.91	0.833	0.86	0.864	0.829	0.821	0.909	0.908	0.915	0.732	0.742	0.757	0.863	0.851	0.874	0.94	0.871	0.885	0.891	0.902	0.882	0.947	0.962	1

## Sheet: Supplementary Table 4
Supplementary Table 4 Summary of DEGs between different time points after Fusarium wilt inoculation.
		No. of upregulated genes	No. of downregulated genes	Total
Resistant line (R)	R1 vs R0	1232	2453	3685
	R2 vs R0	1005	1113	2118
	R3 vs R0	825	1305	2130
	R4 vs R0	1581	2077	3658										‘
	Total	2384	3470	5712
Susceptible line (S)	S1 vs S0	1680	2393	4073
	S2 vs S0	1540	1775	3315
	S3 vs S0	1603	1939	3542
	S4 vs S0	3310	4080	7390
	Total	4091	4991	8907
Total		\	\	9622
R, The resistant line; S, The susceptible line; 0-4, 0 day post inoculation (dpi), 0.5 dpi, 1 dpi, 2 dpi and 4 dpi, respectively.

## Sheet: Supplementary Table 5
Supplementary Table 5 Summary of DEGs between the resistant and susceptible lines.
	No. of upregulated genes	No. of downregulated genes	Total
R0 vs S0	569	330	899
R1 vs S1	257	322	579
R2 vs S2	249	293	542
R3 vs S3	423	434	857
R4 vs S4	1609	1612	3221
Total	\	\	3869
R, The resistant line; S, The susceptible line; 0-4, 0 day post inoculation (dpi), 0.5 dpi, 1 dpi, 2 dpi and 4 dpi, respectively.

## Sheet: Supplementary Table 6
Supplementary Table 6 GO enrichment analysis of 3254 DEGs.
Category	GOID	Term	p-value	Count	geneID
Biological process	GO:0006928	movement of cell or subcellular component	3.54258e-07	27	vigra.VC1973A.gnm6.ann1.Vradi07g23700/vigra.VC1973A.gnm6.ann1.Vradi08g12550/vigra.VC1973A.gnm6.ann1.Vradi07g01040/vigra.VC1973A.gnm6.ann1.Vradi07g03300/vigra.VC1973A.gnm6.ann1.Vradi07g30590/vigra.VC1973A.gnm6.ann1.Vradi05g13960/vigra.VC1973A.gnm6.ann1.Vradi08g08090/vigra.VC1973A.gnm6.ann1.Vradi08g10470/vigra.VC1973A.gnm6.ann1.Vradi06g01260/vigra.VC1973A.gnm6.ann1.Vradi11g09240/vigra.VC1973A.gnm6.…
Biological process	GO:0007018	microtubule-based movement	3.54258e-07	27	vigra.VC1973A.gnm6.ann1.Vradi07g23700/vigra.VC1973A.gnm6.ann1.Vradi08g12550/vigra.VC1973A.gnm6.ann1.Vradi07g01040/vigra.VC1973A.gnm6.ann1.Vradi07g03300/vigra.VC1973A.gnm6.ann1.Vradi07g30590/vigra.VC1973A.gnm6.ann1.Vradi05g13960/vigra.VC1973A.gnm6.ann1.Vradi08g08090/vigra.VC1973A.gnm6.ann1.Vradi08g10470/vigra.VC1973A.gnm6.ann1.Vradi06g01260/vigra.VC1973A.gnm6.ann1.Vradi11g09240/vigra.VC1973A.gnm6.…
Biological process	GO:0007017	microtubule-based process	1.32941e-05	28	vigra.VC1973A.gnm6.ann1.Vradi07g23700/vigra.VC1973A.gnm6.ann1.Vradi08g12550/vigra.VC1973A.gnm6.ann1.Vradi07g01040/vigra.VC1973A.gnm6.ann1.Vradi07g03300/vigra.VC1973A.gnm6.ann1.Vradi07g30590/vigra.VC1973A.gnm6.ann1.Vradi05g13960/vigra.VC1973A.gnm6.ann1.Vradi08g08090/vigra.VC1973A.gnm6.ann1.Vradi08g10470/vigra.VC1973A.gnm6.ann1.Vradi06g01260/vigra.VC1973A.gnm6.ann1.Vradi11g09240/vigra.VC1973A.gnm6.…
Biological process	GO:0006979	response to oxidative stress	2.00214e-05	33	vigra.VC1973A.gnm6.ann1.Vradi06g06610/vigra.VC1973A.gnm6.ann1.Vradi11g02190/vigra.VC1973A.gnm6.ann1.Vradi07g24460/vigra.VC1973A.gnm6.ann1.Vradi0007s01920/vigra.VC1973A.gnm6.ann1.Vradi02g13960/vigra.VC1973A.gnm6.ann1.Vradi04g05800/vigra.VC1973A.gnm6.ann1.Vradi0007s01310/vigra.VC1973A.gnm6.ann1.Vradi0043s00080/vigra.VC1973A.gnm6.ann1.Vradi01g11690/vigra.VC1973A.gnm6.ann1.Vradi06g06580/vigra.VC1973A…
Biological process	GO:0006950	response to stress	0.00153713	63	vigra.VC1973A.gnm6.ann1.Vradi06g05830/vigra.VC1973A.gnm6.ann1.Vradi06g06610/vigra.VC1973A.gnm6.ann1.Vradi11g02190/vigra.VC1973A.gnm6.ann1.Vradi01g04750/vigra.VC1973A.gnm6.ann1.Vradi07g24460/vigra.VC1973A.gnm6.ann1.Vradi08g12010/vigra.VC1973A.gnm6.ann1.Vradi0007s01920/vigra.VC1973A.gnm6.ann1.Vradi02g13960/vigra.VC1973A.gnm6.ann1.Vradi04g05800/vigra.VC1973A.gnm6.ann1.Vradi0007s01310/vigra.VC1973A.g…
Biological process	GO:0032787	monocarboxylic acid metabolic process	0.0182259	25	novel.1022/novel.2058/vigra.VC1973A.gnm6.ann1.Vradi06g11750/vigra.VC1973A.gnm6.ann1.Vradi0393s00080/vigra.VC1973A.gnm6.ann1.Vradi01g13760/vigra.VC1973A.gnm6.ann1.Vradi01g06780/vigra.VC1973A.gnm6.ann1.Vradi01g00090/vigra.VC1973A.gnm6.ann1.Vradi08g18320/vigra.VC1973A.gnm6.ann1.Vradi0149s00060/vigra.VC1973A.gnm6.ann1.Vradi03g04110/vigra.VC1973A.gnm6.ann1.Vradi10g10840/vigra.VC1973A.gnm6.ann1.Vradi08…
Biological process	GO:0045229	external encapsulating structure organization	0.019934	16	vigra.VC1973A.gnm6.ann1.Vradi07g27870/vigra.VC1973A.gnm6.ann1.Vradi09g09290/vigra.VC1973A.gnm6.ann1.Vradi07g28720/novel.156/vigra.VC1973A.gnm6.ann1.Vradi05g21610/vigra.VC1973A.gnm6.ann1.Vradi11g00490/vigra.VC1973A.gnm6.ann1.Vradi09g09280/vigra.VC1973A.gnm6.ann1.Vradi0190s00230/vigra.VC1973A.gnm6.ann1.Vradi0289s00030/vigra.VC1973A.gnm6.ann1.Vradi02g13670/vigra.VC1973A.gnm6.ann1.Vradi0190s00060/vig…
Biological process	GO:0071555	cell wall organization	0.019934	16	vigra.VC1973A.gnm6.ann1.Vradi07g27870/vigra.VC1973A.gnm6.ann1.Vradi09g09290/vigra.VC1973A.gnm6.ann1.Vradi07g28720/novel.156/vigra.VC1973A.gnm6.ann1.Vradi05g21610/vigra.VC1973A.gnm6.ann1.Vradi11g00490/vigra.VC1973A.gnm6.ann1.Vradi09g09280/vigra.VC1973A.gnm6.ann1.Vradi0190s00230/vigra.VC1973A.gnm6.ann1.Vradi0289s00030/vigra.VC1973A.gnm6.ann1.Vradi02g13670/vigra.VC1973A.gnm6.ann1.Vradi0190s00060/vig…
Biological process	GO:0006090	pyruvate metabolic process	0.0285079	12	vigra.VC1973A.gnm6.ann1.Vradi0393s00080/vigra.VC1973A.gnm6.ann1.Vradi01g06780/vigra.VC1973A.gnm6.ann1.Vradi01g00090/vigra.VC1973A.gnm6.ann1.Vradi08g18320/vigra.VC1973A.gnm6.ann1.Vradi03g04110/vigra.VC1973A.gnm6.ann1.Vradi08g16180/vigra.VC1973A.gnm6.ann1.Vradi05g20770/vigra.VC1973A.gnm6.ann1.Vradi02g03550/vigra.VC1973A.gnm6.ann1.Vradi05g18920/vigra.VC1973A.gnm6.ann1.Vradi08g06540/vigra.VC1973A.gnm…
Biological process	GO:0006952	defense response	0.0302593	16	vigra.VC1973A.gnm6.ann1.Vradi09g06610/vigra.VC1973A.gnm6.ann1.Vradi09g03120/vigra.VC1973A.gnm6.ann1.Vradi09g03100/vigra.VC1973A.gnm6.ann1.Vradi09g03090/vigra.VC1973A.gnm6.ann1.Vradi08g11000/vigra.VC1973A.gnm6.ann1.Vradi0319s00030/vigra.VC1973A.gnm6.ann1.Vradi01g09210/vigra.VC1973A.gnm6.ann1.Vradi11g06460/vigra.VC1973A.gnm6.ann1.Vradi07g24910/vigra.VC1973A.gnm6.ann1.Vradi06g04660/vigra.VC1973A.gnm…
Biological process	GO:0071554	cell wall organization or biogenesis	0.035649	18	vigra.VC1973A.gnm6.ann1.Vradi07g27870/vigra.VC1973A.gnm6.ann1.Vradi05g15830/vigra.VC1973A.gnm6.ann1.Vradi09g09290/vigra.VC1973A.gnm6.ann1.Vradi07g28720/novel.156/vigra.VC1973A.gnm6.ann1.Vradi05g21610/vigra.VC1973A.gnm6.ann1.Vradi11g00490/vigra.VC1973A.gnm6.ann1.Vradi09g09280/vigra.VC1973A.gnm6.ann1.Vradi0190s00230/vigra.VC1973A.gnm6.ann1.Vradi0289s00030/vigra.VC1973A.gnm6.ann1.Vradi0656s00030/vig…
Biological process	GO:0030258	lipid modification	0.0521107	6	vigra.VC1973A.gnm6.ann1.Vradi0149s00060/vigra.VC1973A.gnm6.ann1.Vradi10g11530/vigra.VC1973A.gnm6.ann1.Vradi10g11340/vigra.VC1973A.gnm6.ann1.Vradi07g19010/vigra.VC1973A.gnm6.ann1.Vradi10g07520/vigra.VC1973A.gnm6.ann1.Vradi07g15880
Biological process	GO:0042545	cell wall modification	0.0522502	12	vigra.VC1973A.gnm6.ann1.Vradi07g27870/vigra.VC1973A.gnm6.ann1.Vradi09g09290/vigra.VC1973A.gnm6.ann1.Vradi07g28720/vigra.VC1973A.gnm6.ann1.Vradi05g21610/vigra.VC1973A.gnm6.ann1.Vradi11g00490/vigra.VC1973A.gnm6.ann1.Vradi09g09280/vigra.VC1973A.gnm6.ann1.Vradi0289s00030/vigra.VC1973A.gnm6.ann1.Vradi03g06170/vigra.VC1973A.gnm6.ann1.Vradi11g02930/vigra.VC1973A.gnm6.ann1.Vradi0289s00090/vigra.VC1973A.g…
Biological process	GO:0006096	glycolytic process	0.0540003	11	vigra.VC1973A.gnm6.ann1.Vradi0393s00080/vigra.VC1973A.gnm6.ann1.Vradi01g06780/vigra.VC1973A.gnm6.ann1.Vradi01g00090/vigra.VC1973A.gnm6.ann1.Vradi08g18320/vigra.VC1973A.gnm6.ann1.Vradi03g04110/vigra.VC1973A.gnm6.ann1.Vradi08g16180/vigra.VC1973A.gnm6.ann1.Vradi05g20770/vigra.VC1973A.gnm6.ann1.Vradi05g18920/vigra.VC1973A.gnm6.ann1.Vradi08g06540/vigra.VC1973A.gnm6.ann1.Vradi07g28810/vigra.VC1973A.gnm…
Biological process	GO:0006757	ATP generation from ADP	0.0540003	11	vigra.VC1973A.gnm6.ann1.Vradi0393s00080/vigra.VC1973A.gnm6.ann1.Vradi01g06780/vigra.VC1973A.gnm6.ann1.Vradi01g00090/vigra.VC1973A.gnm6.ann1.Vradi08g18320/vigra.VC1973A.gnm6.ann1.Vradi03g04110/vigra.VC1973A.gnm6.ann1.Vradi08g16180/vigra.VC1973A.gnm6.ann1.Vradi05g20770/vigra.VC1973A.gnm6.ann1.Vradi05g18920/vigra.VC1973A.gnm6.ann1.Vradi08g06540/vigra.VC1973A.gnm6.ann1.Vradi07g28810/vigra.VC1973A.gnm…
Biological process	GO:0009135	purine nucleoside diphosphate metabolic process	0.0540003	11	vigra.VC1973A.gnm6.ann1.Vradi0393s00080/vigra.VC1973A.gnm6.ann1.Vradi01g06780/vigra.VC1973A.gnm6.ann1.Vradi01g00090/vigra.VC1973A.gnm6.ann1.Vradi08g18320/vigra.VC1973A.gnm6.ann1.Vradi03g04110/vigra.VC1973A.gnm6.ann1.Vradi08g16180/vigra.VC1973A.gnm6.ann1.Vradi05g20770/vigra.VC1973A.gnm6.ann1.Vradi05g18920/vigra.VC1973A.gnm6.ann1.Vradi08g06540/vigra.VC1973A.gnm6.ann1.Vradi07g28810/vigra.VC1973A.gnm…
Biological process	GO:0009179	purine ribonucleoside diphosphate metabolic process	0.0540003	11	vigra.VC1973A.gnm6.ann1.Vradi0393s00080/vigra.VC1973A.gnm6.ann1.Vradi01g06780/vigra.VC1973A.gnm6.ann1.Vradi01g00090/vigra.VC1973A.gnm6.ann1.Vradi08g18320/vigra.VC1973A.gnm6.ann1.Vradi03g04110/vigra.VC1973A.gnm6.ann1.Vradi08g16180/vigra.VC1973A.gnm6.ann1.Vradi05g20770/vigra.VC1973A.gnm6.ann1.Vradi05g18920/vigra.VC1973A.gnm6.ann1.Vradi08g06540/vigra.VC1973A.gnm6.ann1.Vradi07g28810/vigra.VC1973A.gnm…
Biological process	GO:0009185	ribonucleoside diphosphate metabolic process	0.0540003	11	vigra.VC1973A.gnm6.ann1.Vradi0393s00080/vigra.VC1973A.gnm6.ann1.Vradi01g06780/vigra.VC1973A.gnm6.ann1.Vradi01g00090/vigra.VC1973A.gnm6.ann1.Vradi08g18320/vigra.VC1973A.gnm6.ann1.Vradi03g04110/vigra.VC1973A.gnm6.ann1.Vradi08g16180/vigra.VC1973A.gnm6.ann1.Vradi05g20770/vigra.VC1973A.gnm6.ann1.Vradi05g18920/vigra.VC1973A.gnm6.ann1.Vradi08g06540/vigra.VC1973A.gnm6.ann1.Vradi07g28810/vigra.VC1973A.gnm…
Biological process	GO:0042866	pyruvate biosynthetic process	0.0540003	11	vigra.VC1973A.gnm6.ann1.Vradi0393s00080/vigra.VC1973A.gnm6.ann1.Vradi01g06780/vigra.VC1973A.gnm6.ann1.Vradi01g00090/vigra.VC1973A.gnm6.ann1.Vradi08g18320/vigra.VC1973A.gnm6.ann1.Vradi03g04110/vigra.VC1973A.gnm6.ann1.Vradi08g16180/vigra.VC1973A.gnm6.ann1.Vradi05g20770/vigra.VC1973A.gnm6.ann1.Vradi05g18920/vigra.VC1973A.gnm6.ann1.Vradi08g06540/vigra.VC1973A.gnm6.ann1.Vradi07g28810/vigra.VC1973A.gnm…
Biological process	GO:0046031	ADP metabolic process	0.0540003	11	vigra.VC1973A.gnm6.ann1.Vradi0393s00080/vigra.VC1973A.gnm6.ann1.Vradi01g06780/vigra.VC1973A.gnm6.ann1.Vradi01g00090/vigra.VC1973A.gnm6.ann1.Vradi08g18320/vigra.VC1973A.gnm6.ann1.Vradi03g04110/vigra.VC1973A.gnm6.ann1.Vradi08g16180/vigra.VC1973A.gnm6.ann1.Vradi05g20770/vigra.VC1973A.gnm6.ann1.Vradi05g18920/vigra.VC1973A.gnm6.ann1.Vradi08g06540/vigra.VC1973A.gnm6.ann1.Vradi07g28810/vigra.VC1973A.gnm…
Biological process	GO:0072330	monocarboxylic acid biosynthetic process	0.059757	20	novel.1022/novel.2058/vigra.VC1973A.gnm6.ann1.Vradi0393s00080/vigra.VC1973A.gnm6.ann1.Vradi01g13760/vigra.VC1973A.gnm6.ann1.Vradi01g06780/vigra.VC1973A.gnm6.ann1.Vradi01g00090/vigra.VC1973A.gnm6.ann1.Vradi08g18320/vigra.VC1973A.gnm6.ann1.Vradi03g04110/vigra.VC1973A.gnm6.ann1.Vradi10g10840/vigra.VC1973A.gnm6.ann1.Vradi08g16180/vigra.VC1973A.gnm6.ann1.Vradi05g20770/vigra.VC1973A.gnm6.ann1.Vradi05g1…
Biological process	GO:0009132	nucleoside diphosphate metabolic process	0.0598138	12	vigra.VC1973A.gnm6.ann1.Vradi0393s00080/vigra.VC1973A.gnm6.ann1.Vradi01g06780/vigra.VC1973A.gnm6.ann1.Vradi01g00090/vigra.VC1973A.gnm6.ann1.Vradi08g18320/vigra.VC1973A.gnm6.ann1.Vradi03g04110/vigra.VC1973A.gnm6.ann1.Vradi08g16180/vigra.VC1973A.gnm6.ann1.Vradi05g20770/vigra.VC1973A.gnm6.ann1.Vradi05g18920/vigra.VC1973A.gnm6.ann1.Vradi08g06540/vigra.VC1973A.gnm6.ann1.Vradi07g28810/vigra.VC1973A.gnm…
Biological process	GO:0009127	purine nucleoside monophosphate biosynthetic process	0.0616371	14	vigra.VC1973A.gnm6.ann1.Vradi01g13100/vigra.VC1973A.gnm6.ann1.Vradi0393s00080/vigra.VC1973A.gnm6.ann1.Vradi01g06780/vigra.VC1973A.gnm6.ann1.Vradi01g00090/vigra.VC1973A.gnm6.ann1.Vradi08g18320/vigra.VC1973A.gnm6.ann1.Vradi03g04110/vigra.VC1973A.gnm6.ann1.Vradi08g16180/vigra.VC1973A.gnm6.ann1.Vradi05g20770/vigra.VC1973A.gnm6.ann1.Vradi05g18920/vigra.VC1973A.gnm6.ann1.Vradi08g06540/vigra.VC1973A.gnm…
Biological process	GO:0009156	ribonucleoside monophosphate biosynthetic process	0.0616371	14	vigra.VC1973A.gnm6.ann1.Vradi01g13100/vigra.VC1973A.gnm6.ann1.Vradi0393s00080/vigra.VC1973A.gnm6.ann1.Vradi01g06780/vigra.VC1973A.gnm6.ann1.Vradi01g00090/vigra.VC1973A.gnm6.ann1.Vradi08g18320/vigra.VC1973A.gnm6.ann1.Vradi03g04110/vigra.VC1973A.gnm6.ann1.Vradi08g16180/vigra.VC1973A.gnm6.ann1.Vradi05g20770/vigra.VC1973A.gnm6.ann1.Vradi05g18920/vigra.VC1973A.gnm6.ann1.Vradi08g06540/vigra.VC1973A.gnm…
Biological process	GO:0009168	purine ribonucleoside monophosphate biosynthetic process	0.0616371	14	vigra.VC1973A.gnm6.ann1.Vradi01g13100/vigra.VC1973A.gnm6.ann1.Vradi0393s00080/vigra.VC1973A.gnm6.ann1.Vradi01g06780/vigra.VC1973A.gnm6.ann1.Vradi01g00090/vigra.VC1973A.gnm6.ann1.Vradi08g18320/vigra.VC1973A.gnm6.ann1.Vradi03g04110/vigra.VC1973A.gnm6.ann1.Vradi08g16180/vigra.VC1973A.gnm6.ann1.Vradi05g20770/vigra.VC1973A.gnm6.ann1.Vradi05g18920/vigra.VC1973A.gnm6.ann1.Vradi08g06540/vigra.VC1973A.gnm…
Biological process	GO:0046434	organophosphate catabolic process	0.0680709	12	vigra.VC1973A.gnm6.ann1.Vradi0393s00080/vigra.VC1973A.gnm6.ann1.Vradi01g06780/vigra.VC1973A.gnm6.ann1.Vradi01g00090/vigra.VC1973A.gnm6.ann1.Vradi08g18320/vigra.VC1973A.gnm6.ann1.Vradi03g04110/vigra.VC1973A.gnm6.ann1.Vradi08g16180/vigra.VC1973A.gnm6.ann1.Vradi05g20770/vigra.VC1973A.gnm6.ann1.Vradi05g18920/vigra.VC1973A.gnm6.ann1.Vradi08g06540/vigra.VC1973A.gnm6.ann1.Vradi07g28810/vigra.VC1973A.gnm…
Biological process	GO:0006165	nucleoside diphosphate phosphorylation	0.0712769	11	vigra.VC1973A.gnm6.ann1.Vradi0393s00080/vigra.VC1973A.gnm6.ann1.Vradi01g06780/vigra.VC1973A.gnm6.ann1.Vradi01g00090/vigra.VC1973A.gnm6.ann1.Vradi08g18320/vigra.VC1973A.gnm6.ann1.Vradi03g04110/vigra.VC1973A.gnm6.ann1.Vradi08g16180/vigra.VC1973A.gnm6.ann1.Vradi05g20770/vigra.VC1973A.gnm6.ann1.Vradi05g18920/vigra.VC1973A.gnm6.ann1.Vradi08g06540/vigra.VC1973A.gnm6.ann1.Vradi07g28810/vigra.VC1973A.gnm…
Biological process	GO:0009166	nucleotide catabolic process	0.0712769	11	vigra.VC1973A.gnm6.ann1.Vradi0393s00080/vigra.VC1973A.gnm6.ann1.Vradi01g06780/vigra.VC1973A.gnm6.ann1.Vradi01g00090/vigra.VC1973A.gnm6.ann1.Vradi08g18320/vigra.VC1973A.gnm6.ann1.Vradi03g04110/vigra.VC1973A.gnm6.ann1.Vradi08g16180/vigra.VC1973A.gnm6.ann1.Vradi05g20770/vigra.VC1973A.gnm6.ann1.Vradi05g18920/vigra.VC1973A.gnm6.ann1.Vradi08g06540/vigra.VC1973A.gnm6.ann1.Vradi07g28810/vigra.VC1973A.gnm…
Biological process	GO:0046939	nucleotide phosphorylation	0.0712769	11	vigra.VC1973A.gnm6.ann1.Vradi0393s00080/vigra.VC1973A.gnm6.ann1.Vradi01g06780/vigra.VC1973A.gnm6.ann1.Vradi01g00090/vigra.VC1973A.gnm6.ann1.Vradi08g18320/vigra.VC1973A.gnm6.ann1.Vradi03g04110/vigra.VC1973A.gnm6.ann1.Vradi08g16180/vigra.VC1973A.gnm6.ann1.Vradi05g20770/vigra.VC1973A.gnm6.ann1.Vradi05g18920/vigra.VC1973A.gnm6.ann1.Vradi08g06540/vigra.VC1973A.gnm6.ann1.Vradi07g28810/vigra.VC1973A.gnm…
Biological process	GO:1901292	nucleoside phosphate catabolic process	0.0712769	11	vigra.VC1973A.gnm6.ann1.Vradi0393s00080/vigra.VC1973A.gnm6.ann1.Vradi01g06780/vigra.VC1973A.gnm6.ann1.Vradi01g00090/vigra.VC1973A.gnm6.ann1.Vradi08g18320/vigra.VC1973A.gnm6.ann1.Vradi03g04110/vigra.VC1973A.gnm6.ann1.Vradi08g16180/vigra.VC1973A.gnm6.ann1.Vradi05g20770/vigra.VC1973A.gnm6.ann1.Vradi05g18920/vigra.VC1973A.gnm6.ann1.Vradi08g06540/vigra.VC1973A.gnm6.ann1.Vradi07g28810/vigra.VC1973A.gnm…
Biological process	GO:0042221	response to chemical	0.0791883	26	vigra.VC1973A.gnm6.ann1.Vradi05g09300/novel.419/vigra.VC1973A.gnm6.ann1.Vradi05g15250/novel.1092/vigra.VC1973A.gnm6.ann1.Vradi02g14410/vigra.VC1973A.gnm6.ann1.Vradi0250s00030/vigra.VC1973A.gnm6.ann1.Vradi0007s01830/vigra.VC1973A.gnm6.ann1.Vradi0452s00020/vigra.VC1973A.gnm6.ann1.Vradi05g13790/vigra.VC1973A.gnm6.ann1.Vradi08g07080/vigra.VC1973A.gnm6.ann1.Vradi01g00220/vigra.VC1973A.gnm6.ann1.Vradi0…
Biological process	GO:0006631	fatty acid metabolic process	0.0818992	13	novel.1022/novel.2058/vigra.VC1973A.gnm6.ann1.Vradi06g11750/vigra.VC1973A.gnm6.ann1.Vradi01g13760/vigra.VC1973A.gnm6.ann1.Vradi0149s00060/vigra.VC1973A.gnm6.ann1.Vradi10g10840/vigra.VC1973A.gnm6.ann1.Vradi07g13020/vigra.VC1973A.gnm6.ann1.Vradi02g07050/vigra.VC1973A.gnm6.ann1.Vradi07g19840/vigra.VC1973A.gnm6.ann1.Vradi07g21750/vigra.VC1973A.gnm6.ann1.Vradi07g19010/novel.2011/vigra.VC1973A.gnm6.ann…
Biological process	GO:0006754	ATP biosynthetic process	0.0818992	13	vigra.VC1973A.gnm6.ann1.Vradi01g13100/vigra.VC1973A.gnm6.ann1.Vradi0393s00080/vigra.VC1973A.gnm6.ann1.Vradi01g06780/vigra.VC1973A.gnm6.ann1.Vradi01g00090/vigra.VC1973A.gnm6.ann1.Vradi08g18320/vigra.VC1973A.gnm6.ann1.Vradi03g04110/vigra.VC1973A.gnm6.ann1.Vradi08g16180/vigra.VC1973A.gnm6.ann1.Vradi05g20770/vigra.VC1973A.gnm6.ann1.Vradi05g18920/vigra.VC1973A.gnm6.ann1.Vradi08g06540/vigra.VC1973A.gnm…
Biological process	GO:0009124	nucleoside monophosphate biosynthetic process	0.0860121	14	vigra.VC1973A.gnm6.ann1.Vradi01g13100/vigra.VC1973A.gnm6.ann1.Vradi0393s00080/vigra.VC1973A.gnm6.ann1.Vradi01g06780/vigra.VC1973A.gnm6.ann1.Vradi01g00090/vigra.VC1973A.gnm6.ann1.Vradi08g18320/vigra.VC1973A.gnm6.ann1.Vradi03g04110/vigra.VC1973A.gnm6.ann1.Vradi08g16180/vigra.VC1973A.gnm6.ann1.Vradi05g20770/vigra.VC1973A.gnm6.ann1.Vradi05g18920/vigra.VC1973A.gnm6.ann1.Vradi08g06540/vigra.VC1973A.gnm…
Biological process	GO:0008272	sulfate transport	0.0903819	4	vigra.VC1973A.gnm6.ann1.Vradi05g07730/vigra.VC1973A.gnm6.ann1.Vradi05g20190/vigra.VC1973A.gnm6.ann1.Vradi01g04240/vigra.VC1973A.gnm6.ann1.Vradi06g07640
Biological process	GO:0072348	sulfur compound transport	0.0903819	4	vigra.VC1973A.gnm6.ann1.Vradi05g07730/vigra.VC1973A.gnm6.ann1.Vradi05g20190/vigra.VC1973A.gnm6.ann1.Vradi01g04240/vigra.VC1973A.gnm6.ann1.Vradi06g07640
Biological process	GO:0008299	isoprenoid biosynthetic process	0.0927426	8	vigra.VC1973A.gnm6.ann1.Vradi01g12290/vigra.VC1973A.gnm6.ann1.Vradi07g07740/vigra.VC1973A.gnm6.ann1.Vradi04g02770/vigra.VC1973A.gnm6.ann1.Vradi02g03550/vigra.VC1973A.gnm6.ann1.Vradi0425s00010/vigra.VC1973A.gnm6.ann1.Vradi11g05370/vigra.VC1973A.gnm6.ann1.Vradi10g07150/vigra.VC1973A.gnm6.ann1.Vradi11g02450
Biological process	GO:0072525	pyridine-containing compound biosynthetic process	0.0971183	12	vigra.VC1973A.gnm6.ann1.Vradi0393s00080/vigra.VC1973A.gnm6.ann1.Vradi01g06780/vigra.VC1973A.gnm6.ann1.Vradi01g00090/vigra.VC1973A.gnm6.ann1.Vradi08g18320/vigra.VC1973A.gnm6.ann1.Vradi03g04110/vigra.VC1973A.gnm6.ann1.Vradi08g16180/vigra.VC1973A.gnm6.ann1.Vradi05g20770/vigra.VC1973A.gnm6.ann1.Vradi05g18920/vigra.VC1973A.gnm6.ann1.Vradi08g06540/vigra.VC1973A.gnm6.ann1.Vradi07g28810/vigra.VC1973A.gnm…
Biological process	GO:0006855	drug transmembrane transport	0.101565	13	novel.419/novel.1092/vigra.VC1973A.gnm6.ann1.Vradi02g14410/vigra.VC1973A.gnm6.ann1.Vradi0007s01830/vigra.VC1973A.gnm6.ann1.Vradi01g00220/vigra.VC1973A.gnm6.ann1.Vradi01g13650/vigra.VC1973A.gnm6.ann1.Vradi06g00090/vigra.VC1973A.gnm6.ann1.Vradi05g22600/vigra.VC1973A.gnm6.ann1.Vradi05g07460/vigra.VC1973A.gnm6.ann1.Vradi11g10040/vigra.VC1973A.gnm6.ann1.Vradi11g10030/novel.2418/vigra.VC1973A.gnm6.ann1…
Biological process	GO:0009142	nucleoside triphosphate biosynthetic process	0.101565	13	vigra.VC1973A.gnm6.ann1.Vradi01g13100/vigra.VC1973A.gnm6.ann1.Vradi0393s00080/vigra.VC1973A.gnm6.ann1.Vradi01g06780/vigra.VC1973A.gnm6.ann1.Vradi01g00090/vigra.VC1973A.gnm6.ann1.Vradi08g18320/vigra.VC1973A.gnm6.ann1.Vradi03g04110/vigra.VC1973A.gnm6.ann1.Vradi08g16180/vigra.VC1973A.gnm6.ann1.Vradi05g20770/vigra.VC1973A.gnm6.ann1.Vradi05g18920/vigra.VC1973A.gnm6.ann1.Vradi08g06540/vigra.VC1973A.gnm…
Biological process	GO:0009145	purine nucleoside triphosphate biosynthetic process	0.101565	13	vigra.VC1973A.gnm6.ann1.Vradi01g13100/vigra.VC1973A.gnm6.ann1.Vradi0393s00080/vigra.VC1973A.gnm6.ann1.Vradi01g06780/vigra.VC1973A.gnm6.ann1.Vradi01g00090/vigra.VC1973A.gnm6.ann1.Vradi08g18320/vigra.VC1973A.gnm6.ann1.Vradi03g04110/vigra.VC1973A.gnm6.ann1.Vradi08g16180/vigra.VC1973A.gnm6.ann1.Vradi05g20770/vigra.VC1973A.gnm6.ann1.Vradi05g18920/vigra.VC1973A.gnm6.ann1.Vradi08g06540/vigra.VC1973A.gnm…
Biological process	GO:0009201	ribonucleoside triphosphate biosynthetic process	0.101565	13	vigra.VC1973A.gnm6.ann1.Vradi01g13100/vigra.VC1973A.gnm6.ann1.Vradi0393s00080/vigra.VC1973A.gnm6.ann1.Vradi01g06780/vigra.VC1973A.gnm6.ann1.Vradi01g00090/vigra.VC1973A.gnm6.ann1.Vradi08g18320/vigra.VC1973A.gnm6.ann1.Vradi03g04110/vigra.VC1973A.gnm6.ann1.Vradi08g16180/vigra.VC1973A.gnm6.ann1.Vradi05g20770/vigra.VC1973A.gnm6.ann1.Vradi05g18920/vigra.VC1973A.gnm6.ann1.Vradi08g06540/vigra.VC1973A.gnm…
Biological process	GO:0009206	purine ribonucleoside triphosphate biosynthetic process	0.101565	13	vigra.VC1973A.gnm6.ann1.Vradi01g13100/vigra.VC1973A.gnm6.ann1.Vradi0393s00080/vigra.VC1973A.gnm6.ann1.Vradi01g06780/vigra.VC1973A.gnm6.ann1.Vradi01g00090/vigra.VC1973A.gnm6.ann1.Vradi08g18320/vigra.VC1973A.gnm6.ann1.Vradi03g04110/vigra.VC1973A.gnm6.ann1.Vradi08g16180/vigra.VC1973A.gnm6.ann1.Vradi05g20770/vigra.VC1973A.gnm6.ann1.Vradi05g18920/vigra.VC1973A.gnm6.ann1.Vradi08g06540/vigra.VC1973A.gnm…
Biological process	GO:0015893	drug transport	0.101565	13	novel.419/novel.1092/vigra.VC1973A.gnm6.ann1.Vradi02g14410/vigra.VC1973A.gnm6.ann1.Vradi0007s01830/vigra.VC1973A.gnm6.ann1.Vradi01g00220/vigra.VC1973A.gnm6.ann1.Vradi01g13650/vigra.VC1973A.gnm6.ann1.Vradi06g00090/vigra.VC1973A.gnm6.ann1.Vradi05g22600/vigra.VC1973A.gnm6.ann1.Vradi05g07460/vigra.VC1973A.gnm6.ann1.Vradi11g10040/vigra.VC1973A.gnm6.ann1.Vradi11g10030/novel.2418/vigra.VC1973A.gnm6.ann1…
Biological process	GO:0042493	response to drug	0.101565	13	novel.419/novel.1092/vigra.VC1973A.gnm6.ann1.Vradi02g14410/vigra.VC1973A.gnm6.ann1.Vradi0007s01830/vigra.VC1973A.gnm6.ann1.Vradi01g00220/vigra.VC1973A.gnm6.ann1.Vradi01g13650/vigra.VC1973A.gnm6.ann1.Vradi06g00090/vigra.VC1973A.gnm6.ann1.Vradi05g22600/vigra.VC1973A.gnm6.ann1.Vradi05g07460/vigra.VC1973A.gnm6.ann1.Vradi11g10040/vigra.VC1973A.gnm6.ann1.Vradi11g10030/novel.2418/vigra.VC1973A.gnm6.ann1…
Biological process	GO:0006720	isoprenoid metabolic process	0.10723	8	vigra.VC1973A.gnm6.ann1.Vradi01g12290/vigra.VC1973A.gnm6.ann1.Vradi07g07740/vigra.VC1973A.gnm6.ann1.Vradi04g02770/vigra.VC1973A.gnm6.ann1.Vradi02g03550/vigra.VC1973A.gnm6.ann1.Vradi0425s00010/vigra.VC1973A.gnm6.ann1.Vradi11g05370/vigra.VC1973A.gnm6.ann1.Vradi10g07150/vigra.VC1973A.gnm6.ann1.Vradi11g02450
Biological process	GO:0009733	response to auxin	0.109493	10	vigra.VC1973A.gnm6.ann1.Vradi05g09300/vigra.VC1973A.gnm6.ann1.Vradi05g15250/vigra.VC1973A.gnm6.ann1.Vradi0250s00030/vigra.VC1973A.gnm6.ann1.Vradi0452s00020/vigra.VC1973A.gnm6.ann1.Vradi05g13790/vigra.VC1973A.gnm6.ann1.Vradi08g07080/vigra.VC1973A.gnm6.ann1.Vradi07g30110/vigra.VC1973A.gnm6.ann1.Vradi07g23660/vigra.VC1973A.gnm6.ann1.Vradi05g15360/vigra.VC1973A.gnm6.ann1.Vradi06g16720
Biological process	GO:0009152	purine ribonucleotide biosynthetic process	0.115745	14	vigra.VC1973A.gnm6.ann1.Vradi01g13100/vigra.VC1973A.gnm6.ann1.Vradi0393s00080/vigra.VC1973A.gnm6.ann1.Vradi01g06780/vigra.VC1973A.gnm6.ann1.Vradi01g00090/vigra.VC1973A.gnm6.ann1.Vradi08g18320/vigra.VC1973A.gnm6.ann1.Vradi03g04110/vigra.VC1973A.gnm6.ann1.Vradi08g16180/vigra.VC1973A.gnm6.ann1.Vradi05g20770/vigra.VC1973A.gnm6.ann1.Vradi05g18920/vigra.VC1973A.gnm6.ann1.Vradi08g06540/vigra.VC1973A.gnm…
Biological process	GO:0009260	ribonucleotide biosynthetic process	0.115745	14	vigra.VC1973A.gnm6.ann1.Vradi01g13100/vigra.VC1973A.gnm6.ann1.Vradi0393s00080/vigra.VC1973A.gnm6.ann1.Vradi01g06780/vigra.VC1973A.gnm6.ann1.Vradi01g00090/vigra.VC1973A.gnm6.ann1.Vradi08g18320/vigra.VC1973A.gnm6.ann1.Vradi03g04110/vigra.VC1973A.gnm6.ann1.Vradi08g16180/vigra.VC1973A.gnm6.ann1.Vradi05g20770/vigra.VC1973A.gnm6.ann1.Vradi05g18920/vigra.VC1973A.gnm6.ann1.Vradi08g06540/vigra.VC1973A.gnm…
Biological process	GO:0046390	ribose phosphate biosynthetic process	0.115745	14	vigra.VC1973A.gnm6.ann1.Vradi01g13100/vigra.VC1973A.gnm6.ann1.Vradi0393s00080/vigra.VC1973A.gnm6.ann1.Vradi01g06780/vigra.VC1973A.gnm6.ann1.Vradi01g00090/vigra.VC1973A.gnm6.ann1.Vradi08g18320/vigra.VC1973A.gnm6.ann1.Vradi03g04110/vigra.VC1973A.gnm6.ann1.Vradi08g16180/vigra.VC1973A.gnm6.ann1.Vradi05g20770/vigra.VC1973A.gnm6.ann1.Vradi05g18920/vigra.VC1973A.gnm6.ann1.Vradi08g06540/vigra.VC1973A.gnm…
Biological process	GO:0005992	trehalose biosynthetic process	0.117917	5	vigra.VC1973A.gnm6.ann1.Vradi0183s00080/vigra.VC1973A.gnm6.ann1.Vradi06g07880/vigra.VC1973A.gnm6.ann1.Vradi07g12720/vigra.VC1973A.gnm6.ann1.Vradi05g03980/vigra.VC1973A.gnm6.ann1.Vradi07g21850
Biological process	GO:0006629	lipid metabolic process	0.121379	52	vigra.VC1973A.gnm6.ann1.Vradi01g12290/novel.1022/novel.2058/vigra.VC1973A.gnm6.ann1.Vradi07g04050/vigra.VC1973A.gnm6.ann1.Vradi06g11750/vigra.VC1973A.gnm6.ann1.Vradi06g15350/vigra.VC1973A.gnm6.ann1.Vradi01g12050/vigra.VC1973A.gnm6.ann1.Vradi07g07740/vigra.VC1973A.gnm6.ann1.Vradi04g09370/vigra.VC1973A.gnm6.ann1.Vradi06g04520/vigra.VC1973A.gnm6.ann1.Vradi01g13760/vigra.VC1973A.gnm6.ann1.Vradi03g012…
Biological process	GO:0009126	purine nucleoside monophosphate metabolic process	0.126848	14	vigra.VC1973A.gnm6.ann1.Vradi01g13100/vigra.VC1973A.gnm6.ann1.Vradi0393s00080/vigra.VC1973A.gnm6.ann1.Vradi01g06780/vigra.VC1973A.gnm6.ann1.Vradi01g00090/vigra.VC1973A.gnm6.ann1.Vradi08g18320/vigra.VC1973A.gnm6.ann1.Vradi03g04110/vigra.VC1973A.gnm6.ann1.Vradi08g16180/vigra.VC1973A.gnm6.ann1.Vradi05g20770/vigra.VC1973A.gnm6.ann1.Vradi05g18920/vigra.VC1973A.gnm6.ann1.Vradi08g06540/vigra.VC1973A.gnm…
Biological process	GO:0009161	ribonucleoside monophosphate metabolic process	0.126848	14	vigra.VC1973A.gnm6.ann1.Vradi01g13100/vigra.VC1973A.gnm6.ann1.Vradi0393s00080/vigra.VC1973A.gnm6.ann1.Vradi01g06780/vigra.VC1973A.gnm6.ann1.Vradi01g00090/vigra.VC1973A.gnm6.ann1.Vradi08g18320/vigra.VC1973A.gnm6.ann1.Vradi03g04110/vigra.VC1973A.gnm6.ann1.Vradi08g16180/vigra.VC1973A.gnm6.ann1.Vradi05g20770/vigra.VC1973A.gnm6.ann1.Vradi05g18920/vigra.VC1973A.gnm6.ann1.Vradi08g06540/vigra.VC1973A.gnm…
Biological process	GO:0009167	purine ribonucleoside monophosphate metabolic process	0.126848	14	vigra.VC1973A.gnm6.ann1.Vradi01g13100/vigra.VC1973A.gnm6.ann1.Vradi0393s00080/vigra.VC1973A.gnm6.ann1.Vradi01g06780/vigra.VC1973A.gnm6.ann1.Vradi01g00090/vigra.VC1973A.gnm6.ann1.Vradi08g18320/vigra.VC1973A.gnm6.ann1.Vradi03g04110/vigra.VC1973A.gnm6.ann1.Vradi08g16180/vigra.VC1973A.gnm6.ann1.Vradi05g20770/vigra.VC1973A.gnm6.ann1.Vradi05g18920/vigra.VC1973A.gnm6.ann1.Vradi08g06540/vigra.VC1973A.gnm…
Biological process	GO:0034404	nucleobase-containing small molecule biosynthetic process	0.128385	11	vigra.VC1973A.gnm6.ann1.Vradi0393s00080/vigra.VC1973A.gnm6.ann1.Vradi01g06780/vigra.VC1973A.gnm6.ann1.Vradi01g00090/vigra.VC1973A.gnm6.ann1.Vradi08g18320/vigra.VC1973A.gnm6.ann1.Vradi03g04110/vigra.VC1973A.gnm6.ann1.Vradi08g16180/vigra.VC1973A.gnm6.ann1.Vradi05g20770/vigra.VC1973A.gnm6.ann1.Vradi05g18920/vigra.VC1973A.gnm6.ann1.Vradi08g06540/vigra.VC1973A.gnm6.ann1.Vradi07g28810/vigra.VC1973A.gnm…
Biological process	GO:0006164	purine nucleotide biosynthetic process	0.138535	14	vigra.VC1973A.gnm6.ann1.Vradi01g13100/vigra.VC1973A.gnm6.ann1.Vradi0393s00080/vigra.VC1973A.gnm6.ann1.Vradi01g06780/vigra.VC1973A.gnm6.ann1.Vradi01g00090/vigra.VC1973A.gnm6.ann1.Vradi08g18320/vigra.VC1973A.gnm6.ann1.Vradi03g04110/vigra.VC1973A.gnm6.ann1.Vradi08g16180/vigra.VC1973A.gnm6.ann1.Vradi05g20770/vigra.VC1973A.gnm6.ann1.Vradi05g18920/vigra.VC1973A.gnm6.ann1.Vradi08g06540/vigra.VC1973A.gnm…
Biological process	GO:0009607	response to biotic stimulus	0.139665	8	vigra.VC1973A.gnm6.ann1.Vradi09g03120/vigra.VC1973A.gnm6.ann1.Vradi09g03100/vigra.VC1973A.gnm6.ann1.Vradi09g03090/vigra.VC1973A.gnm6.ann1.Vradi08g11000/vigra.VC1973A.gnm6.ann1.Vradi07g24910/vigra.VC1973A.gnm6.ann1.Vradi0137s00030/vigra.VC1973A.gnm6.ann1.Vradi05g18220/vigra.VC1973A.gnm6.ann1.Vradi05g00670
Biological process	GO:0005991	trehalose metabolic process	0.141419	5	vigra.VC1973A.gnm6.ann1.Vradi0183s00080/vigra.VC1973A.gnm6.ann1.Vradi06g07880/vigra.VC1973A.gnm6.ann1.Vradi07g12720/vigra.VC1973A.gnm6.ann1.Vradi05g03980/vigra.VC1973A.gnm6.ann1.Vradi07g21850
Biological process	GO:0019359	nicotinamide nucleotide biosynthetic process	0.142162	11	vigra.VC1973A.gnm6.ann1.Vradi0393s00080/vigra.VC1973A.gnm6.ann1.Vradi01g06780/vigra.VC1973A.gnm6.ann1.Vradi01g00090/vigra.VC1973A.gnm6.ann1.Vradi08g18320/vigra.VC1973A.gnm6.ann1.Vradi03g04110/vigra.VC1973A.gnm6.ann1.Vradi08g16180/vigra.VC1973A.gnm6.ann1.Vradi05g20770/vigra.VC1973A.gnm6.ann1.Vradi05g18920/vigra.VC1973A.gnm6.ann1.Vradi08g06540/vigra.VC1973A.gnm6.ann1.Vradi07g28810/vigra.VC1973A.gnm…
Biological process	GO:0019363	pyridine nucleotide biosynthetic process	0.142162	11	vigra.VC1973A.gnm6.ann1.Vradi0393s00080/vigra.VC1973A.gnm6.ann1.Vradi01g06780/vigra.VC1973A.gnm6.ann1.Vradi01g00090/vigra.VC1973A.gnm6.ann1.Vradi08g18320/vigra.VC1973A.gnm6.ann1.Vradi03g04110/vigra.VC1973A.gnm6.ann1.Vradi08g16180/vigra.VC1973A.gnm6.ann1.Vradi05g20770/vigra.VC1973A.gnm6.ann1.Vradi05g18920/vigra.VC1973A.gnm6.ann1.Vradi08g06540/vigra.VC1973A.gnm6.ann1.Vradi07g28810/vigra.VC1973A.gnm…
Biological process	GO:0009664	plant-type cell wall organization	0.143891	4	novel.156/vigra.VC1973A.gnm6.ann1.Vradi0190s00230/vigra.VC1973A.gnm6.ann1.Vradi02g13670/vigra.VC1973A.gnm6.ann1.Vradi0190s00060
Biological process	GO:0071669	plant-type cell wall organization or biogenesis	0.143891	4	novel.156/vigra.VC1973A.gnm6.ann1.Vradi0190s00230/vigra.VC1973A.gnm6.ann1.Vradi02g13670/vigra.VC1973A.gnm6.ann1.Vradi0190s00060
Biological process	GO:0072522	purine-containing compound biosynthetic process	0.150796	14	vigra.VC1973A.gnm6.ann1.Vradi01g13100/vigra.VC1973A.gnm6.ann1.Vradi0393s00080/vigra.VC1973A.gnm6.ann1.Vradi01g06780/vigra.VC1973A.gnm6.ann1.Vradi01g00090/vigra.VC1973A.gnm6.ann1.Vradi08g18320/vigra.VC1973A.gnm6.ann1.Vradi03g04110/vigra.VC1973A.gnm6.ann1.Vradi08g16180/vigra.VC1973A.gnm6.ann1.Vradi05g20770/vigra.VC1973A.gnm6.ann1.Vradi05g18920/vigra.VC1973A.gnm6.ann1.Vradi08g06540/vigra.VC1973A.gnm…
Biological process	GO:0034655	nucleobase-containing compound catabolic process	0.159753	12	vigra.VC1973A.gnm6.ann1.Vradi0393s00080/vigra.VC1973A.gnm6.ann1.Vradi01g06780/vigra.VC1973A.gnm6.ann1.Vradi01g00090/vigra.VC1973A.gnm6.ann1.Vradi08g18320/vigra.VC1973A.gnm6.ann1.Vradi03g04110/vigra.VC1973A.gnm6.ann1.Vradi08g16180/vigra.VC1973A.gnm6.ann1.Vradi05g20770/vigra.VC1973A.gnm6.ann1.Vradi02g03760/vigra.VC1973A.gnm6.ann1.Vradi05g18920/vigra.VC1973A.gnm6.ann1.Vradi08g06540/vigra.VC1973A.gnm…
Biological process	GO:0046034	ATP metabolic process	0.162006	13	vigra.VC1973A.gnm6.ann1.Vradi01g13100/vigra.VC1973A.gnm6.ann1.Vradi0393s00080/vigra.VC1973A.gnm6.ann1.Vradi01g06780/vigra.VC1973A.gnm6.ann1.Vradi01g00090/vigra.VC1973A.gnm6.ann1.Vradi08g18320/vigra.VC1973A.gnm6.ann1.Vradi03g04110/vigra.VC1973A.gnm6.ann1.Vradi08g16180/vigra.VC1973A.gnm6.ann1.Vradi05g20770/vigra.VC1973A.gnm6.ann1.Vradi05g18920/vigra.VC1973A.gnm6.ann1.Vradi08g06540/vigra.VC1973A.gnm…
Biological process	GO:0009123	nucleoside monophosphate metabolic process	0.163616	14	vigra.VC1973A.gnm6.ann1.Vradi01g13100/vigra.VC1973A.gnm6.ann1.Vradi0393s00080/vigra.VC1973A.gnm6.ann1.Vradi01g06780/vigra.VC1973A.gnm6.ann1.Vradi01g00090/vigra.VC1973A.gnm6.ann1.Vradi08g18320/vigra.VC1973A.gnm6.ann1.Vradi03g04110/vigra.VC1973A.gnm6.ann1.Vradi08g16180/vigra.VC1973A.gnm6.ann1.Vradi05g20770/vigra.VC1973A.gnm6.ann1.Vradi05g18920/vigra.VC1973A.gnm6.ann1.Vradi08g06540/vigra.VC1973A.gnm…
Biological process	GO:0046351	disaccharide biosynthetic process	0.166759	5	vigra.VC1973A.gnm6.ann1.Vradi0183s00080/vigra.VC1973A.gnm6.ann1.Vradi06g07880/vigra.VC1973A.gnm6.ann1.Vradi07g12720/vigra.VC1973A.gnm6.ann1.Vradi05g03980/vigra.VC1973A.gnm6.ann1.Vradi07g21850
Biological process	GO:0005984	disaccharide metabolic process	0.168812	7	vigra.VC1973A.gnm6.ann1.Vradi03g06190/vigra.VC1973A.gnm6.ann1.Vradi0183s00080/vigra.VC1973A.gnm6.ann1.Vradi06g07880/vigra.VC1973A.gnm6.ann1.Vradi07g12720/vigra.VC1973A.gnm6.ann1.Vradi05g01720/vigra.VC1973A.gnm6.ann1.Vradi05g03980/vigra.VC1973A.gnm6.ann1.Vradi07g21850
Biological process	GO:0006091	generation of precursor metabolites and energy	0.17593	13	vigra.VC1973A.gnm6.ann1.Vradi0393s00080/vigra.VC1973A.gnm6.ann1.Vradi01g06780/vigra.VC1973A.gnm6.ann1.Vradi01g00090/vigra.VC1973A.gnm6.ann1.Vradi08g18320/vigra.VC1973A.gnm6.ann1.Vradi03g04110/vigra.VC1973A.gnm6.ann1.Vradi08g16180/vigra.VC1973A.gnm6.ann1.Vradi05g20770/vigra.VC1973A.gnm6.ann1.Vradi05g18920/vigra.VC1973A.gnm6.ann1.Vradi08g06540/vigra.VC1973A.gnm6.ann1.Vradi0236s00040/vigra.VC1973A.g…
Biological process	GO:0009144	purine nucleoside triphosphate metabolic process	0.19042	13	vigra.VC1973A.gnm6.ann1.Vradi01g13100/vigra.VC1973A.gnm6.ann1.Vradi0393s00080/vigra.VC1973A.gnm6.ann1.Vradi01g06780/vigra.VC1973A.gnm6.ann1.Vradi01g00090/vigra.VC1973A.gnm6.ann1.Vradi08g18320/vigra.VC1973A.gnm6.ann1.Vradi03g04110/vigra.VC1973A.gnm6.ann1.Vradi08g16180/vigra.VC1973A.gnm6.ann1.Vradi05g20770/vigra.VC1973A.gnm6.ann1.Vradi05g18920/vigra.VC1973A.gnm6.ann1.Vradi08g06540/vigra.VC1973A.gnm…
Biological process	GO:0009199	ribonucleoside triphosphate metabolic process	0.19042	13	vigra.VC1973A.gnm6.ann1.Vradi01g13100/vigra.VC1973A.gnm6.ann1.Vradi0393s00080/vigra.VC1973A.gnm6.ann1.Vradi01g06780/vigra.VC1973A.gnm6.ann1.Vradi01g00090/vigra.VC1973A.gnm6.ann1.Vradi08g18320/vigra.VC1973A.gnm6.ann1.Vradi03g04110/vigra.VC1973A.gnm6.ann1.Vradi08g16180/vigra.VC1973A.gnm6.ann1.Vradi05g20770/vigra.VC1973A.gnm6.ann1.Vradi05g18920/vigra.VC1973A.gnm6.ann1.Vradi08g06540/vigra.VC1973A.gnm…
Biological process	GO:0009205	purine ribonucleoside triphosphate metabolic process	0.19042	13	vigra.VC1973A.gnm6.ann1.Vradi01g13100/vigra.VC1973A.gnm6.ann1.Vradi0393s00080/vigra.VC1973A.gnm6.ann1.Vradi01g06780/vigra.VC1973A.gnm6.ann1.Vradi01g00090/vigra.VC1973A.gnm6.ann1.Vradi08g18320/vigra.VC1973A.gnm6.ann1.Vradi03g04110/vigra.VC1973A.gnm6.ann1.Vradi08g16180/vigra.VC1973A.gnm6.ann1.Vradi05g20770/vigra.VC1973A.gnm6.ann1.Vradi05g18920/vigra.VC1973A.gnm6.ann1.Vradi08g06540/vigra.VC1973A.gnm…
Biological process	GO:0044255	cellular lipid metabolic process	0.199596	30	vigra.VC1973A.gnm6.ann1.Vradi01g12290/novel.1022/novel.2058/vigra.VC1973A.gnm6.ann1.Vradi06g11750/vigra.VC1973A.gnm6.ann1.Vradi07g07740/vigra.VC1973A.gnm6.ann1.Vradi01g13760/vigra.VC1973A.gnm6.ann1.Vradi0606s00010/vigra.VC1973A.gnm6.ann1.Vradi07g20700/novel.1970/vigra.VC1973A.gnm6.ann1.Vradi0149s00060/vigra.VC1973A.gnm6.ann1.Vradi04g02770/vigra.VC1973A.gnm6.ann1.Vradi10g10840/vigra.VC1973A.gnm6.a…
Biological process	GO:0006633	fatty acid biosynthetic process	0.200236	9	novel.1022/novel.2058/vigra.VC1973A.gnm6.ann1.Vradi01g13760/vigra.VC1973A.gnm6.ann1.Vradi10g10840/vigra.VC1973A.gnm6.ann1.Vradi07g13020/vigra.VC1973A.gnm6.ann1.Vradi02g07050/vigra.VC1973A.gnm6.ann1.Vradi07g19840/vigra.VC1973A.gnm6.ann1.Vradi07g21750/vigra.VC1973A.gnm6.ann1.Vradi08g00150
Biological process	GO:0009165	nucleotide biosynthetic process	0.203854	16	vigra.VC1973A.gnm6.ann1.Vradi01g13100/vigra.VC1973A.gnm6.ann1.Vradi0393s00080/vigra.VC1973A.gnm6.ann1.Vradi01g06780/vigra.VC1973A.gnm6.ann1.Vradi01g00090/vigra.VC1973A.gnm6.ann1.Vradi08g18320/vigra.VC1973A.gnm6.ann1.Vradi03g04110/vigra.VC1973A.gnm6.ann1.Vradi08g16180/vigra.VC1973A.gnm6.ann1.Vradi05g20770/vigra.VC1973A.gnm6.ann1.Vradi05g18920/vigra.VC1973A.gnm6.ann1.Vradi08g06540/vigra.VC1973A.gnm…
Biological process	GO:1901293	nucleoside phosphate biosynthetic process	0.203854	16	vigra.VC1973A.gnm6.ann1.Vradi01g13100/vigra.VC1973A.gnm6.ann1.Vradi0393s00080/vigra.VC1973A.gnm6.ann1.Vradi01g06780/vigra.VC1973A.gnm6.ann1.Vradi01g00090/vigra.VC1973A.gnm6.ann1.Vradi08g18320/vigra.VC1973A.gnm6.ann1.Vradi03g04110/vigra.VC1973A.gnm6.ann1.Vradi08g16180/vigra.VC1973A.gnm6.ann1.Vradi05g20770/vigra.VC1973A.gnm6.ann1.Vradi05g18920/vigra.VC1973A.gnm6.ann1.Vradi08g06540/vigra.VC1973A.gnm…
Biological process	GO:0016052	carbohydrate catabolic process	0.205214	12	vigra.VC1973A.gnm6.ann1.Vradi0393s00080/vigra.VC1973A.gnm6.ann1.Vradi01g06780/vigra.VC1973A.gnm6.ann1.Vradi01g00090/vigra.VC1973A.gnm6.ann1.Vradi08g18320/vigra.VC1973A.gnm6.ann1.Vradi03g04110/vigra.VC1973A.gnm6.ann1.Vradi08g16180/vigra.VC1973A.gnm6.ann1.Vradi05g20770/vigra.VC1973A.gnm6.ann1.Vradi05g18920/vigra.VC1973A.gnm6.ann1.Vradi08g06540/vigra.VC1973A.gnm6.ann1.Vradi07g28810/vigra.VC1973A.gnm…
Biological process	GO:0015696	ammonium transport	0.218308	3	vigra.VC1973A.gnm6.ann1.Vradi0221s00090/vigra.VC1973A.gnm6.ann1.Vradi07g31300/vigra.VC1973A.gnm6.ann1.Vradi08g05120
Biological process	GO:0072350	tricarboxylic acid metabolic process	0.218308	3	vigra.VC1973A.gnm6.ann1.Vradi05g19040/vigra.VC1973A.gnm6.ann1.Vradi0236s00040/vigra.VC1973A.gnm6.ann1.Vradi0023s00540
Biological process	GO:0009141	nucleoside triphosphate metabolic process	0.220978	13	vigra.VC1973A.gnm6.ann1.Vradi01g13100/vigra.VC1973A.gnm6.ann1.Vradi0393s00080/vigra.VC1973A.gnm6.ann1.Vradi01g06780/vigra.VC1973A.gnm6.ann1.Vradi01g00090/vigra.VC1973A.gnm6.ann1.Vradi08g18320/vigra.VC1973A.gnm6.ann1.Vradi03g04110/vigra.VC1973A.gnm6.ann1.Vradi08g16180/vigra.VC1973A.gnm6.ann1.Vradi05g20770/vigra.VC1973A.gnm6.ann1.Vradi05g18920/vigra.VC1973A.gnm6.ann1.Vradi08g06540/vigra.VC1973A.gnm…
Biological process	GO:0000003	reproduction	0.220995	10	vigra.VC1973A.gnm6.ann1.Vradi05g22930/vigra.VC1973A.gnm6.ann1.Vradi02g10600/vigra.VC1973A.gnm6.ann1.Vradi0310s00070/vigra.VC1973A.gnm6.ann1.Vradi02g11420/vigra.VC1973A.gnm6.ann1.Vradi07g15610/vigra.VC1973A.gnm6.ann1.Vradi10g11640/vigra.VC1973A.gnm6.ann1.Vradi11g11750/novel.947/vigra.VC1973A.gnm6.ann1.Vradi02g06260/vigra.VC1973A.gnm6.ann1.Vradi08g15880
Biological process	GO:0022414	reproductive process	0.220995	10	vigra.VC1973A.gnm6.ann1.Vradi05g22930/vigra.VC1973A.gnm6.ann1.Vradi02g10600/vigra.VC1973A.gnm6.ann1.Vradi0310s00070/vigra.VC1973A.gnm6.ann1.Vradi02g11420/vigra.VC1973A.gnm6.ann1.Vradi07g15610/vigra.VC1973A.gnm6.ann1.Vradi10g11640/vigra.VC1973A.gnm6.ann1.Vradi11g11750/novel.947/vigra.VC1973A.gnm6.ann1.Vradi02g06260/vigra.VC1973A.gnm6.ann1.Vradi08g15880
Biological process	GO:0009108	coenzyme biosynthetic process	0.233561	15	vigra.VC1973A.gnm6.ann1.Vradi0393s00080/vigra.VC1973A.gnm6.ann1.Vradi01g06780/vigra.VC1973A.gnm6.ann1.Vradi01g00090/vigra.VC1973A.gnm6.ann1.Vradi08g18320/vigra.VC1973A.gnm6.ann1.Vradi03g04110/vigra.VC1973A.gnm6.ann1.Vradi08g16180/vigra.VC1973A.gnm6.ann1.Vradi05g20770/vigra.VC1973A.gnm6.ann1.Vradi05g18920/vigra.VC1973A.gnm6.ann1.Vradi08g06540/vigra.VC1973A.gnm6.ann1.Vradi07g28810/vigra.VC1973A.gnm…
Biological process	GO:0046700	heterocycle catabolic process	0.238323	12	vigra.VC1973A.gnm6.ann1.Vradi0393s00080/vigra.VC1973A.gnm6.ann1.Vradi01g06780/vigra.VC1973A.gnm6.ann1.Vradi01g00090/vigra.VC1973A.gnm6.ann1.Vradi08g18320/vigra.VC1973A.gnm6.ann1.Vradi03g04110/vigra.VC1973A.gnm6.ann1.Vradi08g16180/vigra.VC1973A.gnm6.ann1.Vradi05g20770/vigra.VC1973A.gnm6.ann1.Vradi02g03760/vigra.VC1973A.gnm6.ann1.Vradi05g18920/vigra.VC1973A.gnm6.ann1.Vradi08g06540/vigra.VC1973A.gnm…
Biological process	GO:0072524	pyridine-containing compound metabolic process	0.238323	12	vigra.VC1973A.gnm6.ann1.Vradi0393s00080/vigra.VC1973A.gnm6.ann1.Vradi01g06780/vigra.VC1973A.gnm6.ann1.Vradi01g00090/vigra.VC1973A.gnm6.ann1.Vradi08g18320/vigra.VC1973A.gnm6.ann1.Vradi03g04110/vigra.VC1973A.gnm6.ann1.Vradi08g16180/vigra.VC1973A.gnm6.ann1.Vradi05g20770/vigra.VC1973A.gnm6.ann1.Vradi05g18920/vigra.VC1973A.gnm6.ann1.Vradi08g06540/vigra.VC1973A.gnm6.ann1.Vradi07g28810/vigra.VC1973A.gnm…
Biological process	GO:0007186	G-protein coupled receptor signaling pathway	0.240674	4	vigra.VC1973A.gnm6.ann1.Vradi02g03750/vigra.VC1973A.gnm6.ann1.Vradi02g10620/vigra.VC1973A.gnm6.ann1.Vradi11g11270/vigra.VC1973A.gnm6.ann1.Vradi07g10020
Biological process	GO:0022402	cell cycle process	0.240674	4	vigra.VC1973A.gnm6.ann1.Vradi08g15490/vigra.VC1973A.gnm6.ann1.Vradi02g06260/vigra.VC1973A.gnm6.ann1.Vradi08g15880/vigra.VC1973A.gnm6.ann1.Vradi02g07150
Biological process	GO:0009150	purine ribonucleotide metabolic process	0.248597	15	vigra.VC1973A.gnm6.ann1.Vradi01g13100/vigra.VC1973A.gnm6.ann1.Vradi11g07350/vigra.VC1973A.gnm6.ann1.Vradi0393s00080/vigra.VC1973A.gnm6.ann1.Vradi01g06780/vigra.VC1973A.gnm6.ann1.Vradi01g00090/vigra.VC1973A.gnm6.ann1.Vradi08g18320/vigra.VC1973A.gnm6.ann1.Vradi03g04110/vigra.VC1973A.gnm6.ann1.Vradi08g16180/vigra.VC1973A.gnm6.ann1.Vradi05g20770/vigra.VC1973A.gnm6.ann1.Vradi05g18920/vigra.VC1973A.gnm…
Biological process	GO:0009259	ribonucleotide metabolic process	0.248597	15	vigra.VC1973A.gnm6.ann1.Vradi01g13100/vigra.VC1973A.gnm6.ann1.Vradi11g07350/vigra.VC1973A.gnm6.ann1.Vradi0393s00080/vigra.VC1973A.gnm6.ann1.Vradi01g06780/vigra.VC1973A.gnm6.ann1.Vradi01g00090/vigra.VC1973A.gnm6.ann1.Vradi08g18320/vigra.VC1973A.gnm6.ann1.Vradi03g04110/vigra.VC1973A.gnm6.ann1.Vradi08g16180/vigra.VC1973A.gnm6.ann1.Vradi05g20770/vigra.VC1973A.gnm6.ann1.Vradi05g18920/vigra.VC1973A.gnm…
Biological process	GO:0044270	cellular nitrogen compound catabolic process	0.255602	12	vigra.VC1973A.gnm6.ann1.Vradi0393s00080/vigra.VC1973A.gnm6.ann1.Vradi01g06780/vigra.VC1973A.gnm6.ann1.Vradi01g00090/vigra.VC1973A.gnm6.ann1.Vradi08g18320/vigra.VC1973A.gnm6.ann1.Vradi03g04110/vigra.VC1973A.gnm6.ann1.Vradi08g16180/vigra.VC1973A.gnm6.ann1.Vradi05g20770/vigra.VC1973A.gnm6.ann1.Vradi02g03760/vigra.VC1973A.gnm6.ann1.Vradi05g18920/vigra.VC1973A.gnm6.ann1.Vradi08g06540/vigra.VC1973A.gnm…
Biological process	GO:0016042	lipid catabolic process	0.26095	3	vigra.VC1973A.gnm6.ann1.Vradi0149s00060/vigra.VC1973A.gnm6.ann1.Vradi07g19010/novel.2007
Biological process	GO:0044272	sulfur compound biosynthetic process	0.275747	4	vigra.VC1973A.gnm6.ann1.Vradi06g01110/novel.2219/novel.931/novel.920
Biological process	GO:0006163	purine nucleotide metabolic process	0.279724	15	vigra.VC1973A.gnm6.ann1.Vradi01g13100/vigra.VC1973A.gnm6.ann1.Vradi11g07350/vigra.VC1973A.gnm6.ann1.Vradi0393s00080/vigra.VC1973A.gnm6.ann1.Vradi01g06780/vigra.VC1973A.gnm6.ann1.Vradi01g00090/vigra.VC1973A.gnm6.ann1.Vradi08g18320/vigra.VC1973A.gnm6.ann1.Vradi03g04110/vigra.VC1973A.gnm6.ann1.Vradi08g16180/vigra.VC1973A.gnm6.ann1.Vradi05g20770/vigra.VC1973A.gnm6.ann1.Vradi05g18920/vigra.VC1973A.gnm…
Biological process	GO:0017144	drug metabolic process	0.292365	22	vigra.VC1973A.gnm6.ann1.Vradi01g13100/vigra.VC1973A.gnm6.ann1.Vradi05g15830/vigra.VC1973A.gnm6.ann1.Vradi0393s00080/vigra.VC1973A.gnm6.ann1.Vradi01g06780/vigra.VC1973A.gnm6.ann1.Vradi01g00090/vigra.VC1973A.gnm6.ann1.Vradi08g18320/vigra.VC1973A.gnm6.ann1.Vradi03g04110/vigra.VC1973A.gnm6.ann1.Vradi08g16180/vigra.VC1973A.gnm6.ann1.Vradi05g20770/vigra.VC1973A.gnm6.ann1.Vradi05g19040/vigra.VC1973A.gnm…
Biological process	GO:0072521	purine-containing compound metabolic process	0.295753	15	vigra.VC1973A.gnm6.ann1.Vradi01g13100/vigra.VC1973A.gnm6.ann1.Vradi11g07350/vigra.VC1973A.gnm6.ann1.Vradi0393s00080/vigra.VC1973A.gnm6.ann1.Vradi01g06780/vigra.VC1973A.gnm6.ann1.Vradi01g00090/vigra.VC1973A.gnm6.ann1.Vradi08g18320/vigra.VC1973A.gnm6.ann1.Vradi03g04110/vigra.VC1973A.gnm6.ann1.Vradi08g16180/vigra.VC1973A.gnm6.ann1.Vradi05g20770/vigra.VC1973A.gnm6.ann1.Vradi05g18920/vigra.VC1973A.gnm…
Biological process	GO:0009832	plant-type cell wall biogenesis	0.3045	3	vigra.VC1973A.gnm6.ann1.Vradi0190s00230/vigra.VC1973A.gnm6.ann1.Vradi02g13670/vigra.VC1973A.gnm6.ann1.Vradi0190s00060
Biological process	GO:0010215	cellulose microfibril organization	0.3045	3	vigra.VC1973A.gnm6.ann1.Vradi0190s00230/vigra.VC1973A.gnm6.ann1.Vradi02g13670/vigra.VC1973A.gnm6.ann1.Vradi0190s00060
Biological process	GO:0016049	cell growth	0.3045	3	vigra.VC1973A.gnm6.ann1.Vradi0190s00230/vigra.VC1973A.gnm6.ann1.Vradi02g13670/vigra.VC1973A.gnm6.ann1.Vradi0190s00060
Biological process	GO:0030198	extracellular matrix organization	0.3045	3	vigra.VC1973A.gnm6.ann1.Vradi0190s00230/vigra.VC1973A.gnm6.ann1.Vradi02g13670/vigra.VC1973A.gnm6.ann1.Vradi0190s00060
Biological process	GO:0040007	growth	0.3045	3	vigra.VC1973A.gnm6.ann1.Vradi0190s00230/vigra.VC1973A.gnm6.ann1.Vradi02g13670/vigra.VC1973A.gnm6.ann1.Vradi0190s00060
Biological process	GO:0043062	extracellular structure organization	0.3045	3	vigra.VC1973A.gnm6.ann1.Vradi0190s00230/vigra.VC1973A.gnm6.ann1.Vradi02g13670/vigra.VC1973A.gnm6.ann1.Vradi0190s00060
Biological process	GO:0070726	cell wall assembly	0.3045	3	vigra.VC1973A.gnm6.ann1.Vradi0190s00230/vigra.VC1973A.gnm6.ann1.Vradi02g13670/vigra.VC1973A.gnm6.ann1.Vradi0190s00060
Biological process	GO:0071668	plant-type cell wall assembly	0.3045	3	vigra.VC1973A.gnm6.ann1.Vradi0190s00230/vigra.VC1973A.gnm6.ann1.Vradi02g13670/vigra.VC1973A.gnm6.ann1.Vradi0190s00060
Biological process	GO:0009719	response to endogenous stimulus	0.309809	12	vigra.VC1973A.gnm6.ann1.Vradi05g09300/vigra.VC1973A.gnm6.ann1.Vradi05g15250/vigra.VC1973A.gnm6.ann1.Vradi0250s00030/vigra.VC1973A.gnm6.ann1.Vradi0452s00020/vigra.VC1973A.gnm6.ann1.Vradi05g13790/vigra.VC1973A.gnm6.ann1.Vradi08g07080/vigra.VC1973A.gnm6.ann1.Vradi07g30110/vigra.VC1973A.gnm6.ann1.Vradi04g02680/vigra.VC1973A.gnm6.ann1.Vradi02g05690/vigra.VC1973A.gnm6.ann1.Vradi07g23660/vigra.VC1973A.g…
Biological process	GO:0009725	response to hormone	0.309809	12	vigra.VC1973A.gnm6.ann1.Vradi05g09300/vigra.VC1973A.gnm6.ann1.Vradi05g15250/vigra.VC1973A.gnm6.ann1.Vradi0250s00030/vigra.VC1973A.gnm6.ann1.Vradi0452s00020/vigra.VC1973A.gnm6.ann1.Vradi05g13790/vigra.VC1973A.gnm6.ann1.Vradi08g07080/vigra.VC1973A.gnm6.ann1.Vradi07g30110/vigra.VC1973A.gnm6.ann1.Vradi04g02680/vigra.VC1973A.gnm6.ann1.Vradi02g05690/vigra.VC1973A.gnm6.ann1.Vradi07g23660/vigra.VC1973A.g…
Biological process	GO:0010033	response to organic substance	0.309809	12	vigra.VC1973A.gnm6.ann1.Vradi05g09300/vigra.VC1973A.gnm6.ann1.Vradi05g15250/vigra.VC1973A.gnm6.ann1.Vradi0250s00030/vigra.VC1973A.gnm6.ann1.Vradi0452s00020/vigra.VC1973A.gnm6.ann1.Vradi05g13790/vigra.VC1973A.gnm6.ann1.Vradi08g07080/vigra.VC1973A.gnm6.ann1.Vradi07g30110/vigra.VC1973A.gnm6.ann1.Vradi04g02680/vigra.VC1973A.gnm6.ann1.Vradi02g05690/vigra.VC1973A.gnm6.ann1.Vradi07g23660/vigra.VC1973A.g…
Biological process	GO:1901361	organic cyclic compound catabolic process	0.309809	12	vigra.VC1973A.gnm6.ann1.Vradi0393s00080/vigra.VC1973A.gnm6.ann1.Vradi01g06780/vigra.VC1973A.gnm6.ann1.Vradi01g00090/vigra.VC1973A.gnm6.ann1.Vradi08g18320/vigra.VC1973A.gnm6.ann1.Vradi03g04110/vigra.VC1973A.gnm6.ann1.Vradi08g16180/vigra.VC1973A.gnm6.ann1.Vradi05g20770/vigra.VC1973A.gnm6.ann1.Vradi02g03760/vigra.VC1973A.gnm6.ann1.Vradi05g18920/vigra.VC1973A.gnm6.ann1.Vradi08g06540/vigra.VC1973A.gnm…
Biological process	GO:0019362	pyridine nucleotide metabolic process	0.314716	11	vigra.VC1973A.gnm6.ann1.Vradi0393s00080/vigra.VC1973A.gnm6.ann1.Vradi01g06780/vigra.VC1973A.gnm6.ann1.Vradi01g00090/vigra.VC1973A.gnm6.ann1.Vradi08g18320/vigra.VC1973A.gnm6.ann1.Vradi03g04110/vigra.VC1973A.gnm6.ann1.Vradi08g16180/vigra.VC1973A.gnm6.ann1.Vradi05g20770/vigra.VC1973A.gnm6.ann1.Vradi05g18920/vigra.VC1973A.gnm6.ann1.Vradi08g06540/vigra.VC1973A.gnm6.ann1.Vradi07g28810/vigra.VC1973A.gnm…
Biological process	GO:0046496	nicotinamide nucleotide metabolic process	0.314716	11	vigra.VC1973A.gnm6.ann1.Vradi0393s00080/vigra.VC1973A.gnm6.ann1.Vradi01g06780/vigra.VC1973A.gnm6.ann1.Vradi01g00090/vigra.VC1973A.gnm6.ann1.Vradi08g18320/vigra.VC1973A.gnm6.ann1.Vradi03g04110/vigra.VC1973A.gnm6.ann1.Vradi08g16180/vigra.VC1973A.gnm6.ann1.Vradi05g20770/vigra.VC1973A.gnm6.ann1.Vradi05g18920/vigra.VC1973A.gnm6.ann1.Vradi08g06540/vigra.VC1973A.gnm6.ann1.Vradi07g28810/vigra.VC1973A.gnm…
Biological process	GO:0019439	aromatic compound catabolic process	0.32851	12	vigra.VC1973A.gnm6.ann1.Vradi0393s00080/vigra.VC1973A.gnm6.ann1.Vradi01g06780/vigra.VC1973A.gnm6.ann1.Vradi01g00090/vigra.VC1973A.gnm6.ann1.Vradi08g18320/vigra.VC1973A.gnm6.ann1.Vradi03g04110/vigra.VC1973A.gnm6.ann1.Vradi08g16180/vigra.VC1973A.gnm6.ann1.Vradi05g20770/vigra.VC1973A.gnm6.ann1.Vradi02g03760/vigra.VC1973A.gnm6.ann1.Vradi05g18920/vigra.VC1973A.gnm6.ann1.Vradi08g06540/vigra.VC1973A.gnm…
Biological process	GO:0006733	oxidoreduction coenzyme metabolic process	0.334432	11	vigra.VC1973A.gnm6.ann1.Vradi0393s00080/vigra.VC1973A.gnm6.ann1.Vradi01g06780/vigra.VC1973A.gnm6.ann1.Vradi01g00090/vigra.VC1973A.gnm6.ann1.Vradi08g18320/vigra.VC1973A.gnm6.ann1.Vradi03g04110/vigra.VC1973A.gnm6.ann1.Vradi08g16180/vigra.VC1973A.gnm6.ann1.Vradi05g20770/vigra.VC1973A.gnm6.ann1.Vradi05g18920/vigra.VC1973A.gnm6.ann1.Vradi08g06540/vigra.VC1973A.gnm6.ann1.Vradi07g28810/vigra.VC1973A.gnm…
Biological process	GO:0009311	oligosaccharide metabolic process	0.335031	7	vigra.VC1973A.gnm6.ann1.Vradi03g06190/vigra.VC1973A.gnm6.ann1.Vradi0183s00080/vigra.VC1973A.gnm6.ann1.Vradi06g07880/vigra.VC1973A.gnm6.ann1.Vradi07g12720/vigra.VC1973A.gnm6.ann1.Vradi05g01720/vigra.VC1973A.gnm6.ann1.Vradi05g03980/vigra.VC1973A.gnm6.ann1.Vradi07g21850
Biological process	GO:0051188	cofactor biosynthetic process	0.338911	16	vigra.VC1973A.gnm6.ann1.Vradi0393s00080/vigra.VC1973A.gnm6.ann1.Vradi01g06780/vigra.VC1973A.gnm6.ann1.Vradi01g00090/vigra.VC1973A.gnm6.ann1.Vradi08g18320/vigra.VC1973A.gnm6.ann1.Vradi03g04110/vigra.VC1973A.gnm6.ann1.Vradi06g00200/vigra.VC1973A.gnm6.ann1.Vradi08g16180/vigra.VC1973A.gnm6.ann1.Vradi05g20770/vigra.VC1973A.gnm6.ann1.Vradi05g18920/vigra.VC1973A.gnm6.ann1.Vradi08g06540/vigra.VC1973A.gnm…
Biological process	GO:0009308	amine metabolic process	0.339954	6	vigra.VC1973A.gnm6.ann1.Vradi05g13490/vigra.VC1973A.gnm6.ann1.Vradi05g19040/novel.3223/novel.3219/vigra.VC1973A.gnm6.ann1.Vradi05g02400/novel.3224
Biological process	GO:0006260	DNA replication	0.347054	9	vigra.VC1973A.gnm6.ann1.Vradi06g02210/vigra.VC1973A.gnm6.ann1.Vradi10g03240/vigra.VC1973A.gnm6.ann1.Vradi07g17560/vigra.VC1973A.gnm6.ann1.Vradi05g05850/vigra.VC1973A.gnm6.ann1.Vradi01g09940/vigra.VC1973A.gnm6.ann1.Vradi02g03080/vigra.VC1973A.gnm6.ann1.Vradi03g06470/vigra.VC1973A.gnm6.ann1.Vradi04g04060/vigra.VC1973A.gnm6.ann1.Vradi0051s00470
Biological process	GO:0044262	cellular carbohydrate metabolic process	0.358781	20	vigra.VC1973A.gnm6.ann1.Vradi04g04000/vigra.VC1973A.gnm6.ann1.Vradi03g06190/vigra.VC1973A.gnm6.ann1.Vradi0183s00080/vigra.VC1973A.gnm6.ann1.Vradi06g07880/vigra.VC1973A.gnm6.ann1.Vradi07g12720/vigra.VC1973A.gnm6.ann1.Vradi10g02700/vigra.VC1973A.gnm6.ann1.Vradi05g01720/vigra.VC1973A.gnm6.ann1.Vradi02g01540/vigra.VC1973A.gnm6.ann1.Vradi02g06230/vigra.VC1973A.gnm6.ann1.Vradi05g03980/vigra.VC1973A.gnm…
Biological process	GO:0008610	lipid biosynthetic process	0.366401	21	vigra.VC1973A.gnm6.ann1.Vradi01g12290/novel.1022/novel.2058/vigra.VC1973A.gnm6.ann1.Vradi07g07740/vigra.VC1973A.gnm6.ann1.Vradi01g13760/vigra.VC1973A.gnm6.ann1.Vradi0606s00010/vigra.VC1973A.gnm6.ann1.Vradi07g20700/vigra.VC1973A.gnm6.ann1.Vradi04g02770/vigra.VC1973A.gnm6.ann1.Vradi10g10840/vigra.VC1973A.gnm6.ann1.Vradi02g03550/vigra.VC1973A.gnm6.ann1.Vradi07g13020/vigra.VC1973A.gnm6.ann1.Vradi0425…
Biological process	GO:0009312	oligosaccharide biosynthetic process	0.376041	5	vigra.VC1973A.gnm6.ann1.Vradi0183s00080/vigra.VC1973A.gnm6.ann1.Vradi06g07880/vigra.VC1973A.gnm6.ann1.Vradi07g12720/vigra.VC1973A.gnm6.ann1.Vradi05g03980/vigra.VC1973A.gnm6.ann1.Vradi07g21850
Biological process	GO:0006812	cation transport	0.376724	33	vigra.VC1973A.gnm6.ann1.Vradi01g13100/novel.48/vigra.VC1973A.gnm6.ann1.Vradi07g30860/vigra.VC1973A.gnm6.ann1.Vradi03g03650/vigra.VC1973A.gnm6.ann1.Vradi04g01890/novel.49/vigra.VC1973A.gnm6.ann1.Vradi01g13920/vigra.VC1973A.gnm6.ann1.Vradi02g02910/vigra.VC1973A.gnm6.ann1.Vradi10g07550/vigra.VC1973A.gnm6.ann1.Vradi08g06770/vigra.VC1973A.gnm6.ann1.Vradi08g02890/vigra.VC1973A.gnm6.ann1.Vradi11g13190/n…
Biological process	GO:0016053	organic acid biosynthetic process	0.386874	24	vigra.VC1973A.gnm6.ann1.Vradi06g01110/novel.1022/novel.2058/vigra.VC1973A.gnm6.ann1.Vradi0393s00080/vigra.VC1973A.gnm6.ann1.Vradi01g13760/vigra.VC1973A.gnm6.ann1.Vradi01g06780/vigra.VC1973A.gnm6.ann1.Vradi01g00090/vigra.VC1973A.gnm6.ann1.Vradi08g18320/vigra.VC1973A.gnm6.ann1.Vradi03g04110/vigra.VC1973A.gnm6.ann1.Vradi10g10840/vigra.VC1973A.gnm6.ann1.Vradi08g16180/vigra.VC1973A.gnm6.ann1.Vradi05g2…
Biological process	GO:0046394	carboxylic acid biosynthetic process	0.386874	24	vigra.VC1973A.gnm6.ann1.Vradi06g01110/novel.1022/novel.2058/vigra.VC1973A.gnm6.ann1.Vradi0393s00080/vigra.VC1973A.gnm6.ann1.Vradi01g13760/vigra.VC1973A.gnm6.ann1.Vradi01g06780/vigra.VC1973A.gnm6.ann1.Vradi01g00090/vigra.VC1973A.gnm6.ann1.Vradi08g18320/vigra.VC1973A.gnm6.ann1.Vradi03g04110/vigra.VC1973A.gnm6.ann1.Vradi10g10840/vigra.VC1973A.gnm6.ann1.Vradi08g16180/vigra.VC1973A.gnm6.ann1.Vradi05g2…
Biological process	GO:0006721	terpenoid metabolic process	0.391793	3	vigra.VC1973A.gnm6.ann1.Vradi07g07740/vigra.VC1973A.gnm6.ann1.Vradi04g02770/vigra.VC1973A.gnm6.ann1.Vradi0425s00010
Biological process	GO:0016114	terpenoid biosynthetic process	0.391793	3	vigra.VC1973A.gnm6.ann1.Vradi07g07740/vigra.VC1973A.gnm6.ann1.Vradi04g02770/vigra.VC1973A.gnm6.ann1.Vradi0425s00010
Biological process	GO:0019693	ribose phosphate metabolic process	0.413588	15	vigra.VC1973A.gnm6.ann1.Vradi01g13100/vigra.VC1973A.gnm6.ann1.Vradi11g07350/vigra.VC1973A.gnm6.ann1.Vradi0393s00080/vigra.VC1973A.gnm6.ann1.Vradi01g06780/vigra.VC1973A.gnm6.ann1.Vradi01g00090/vigra.VC1973A.gnm6.ann1.Vradi08g18320/vigra.VC1973A.gnm6.ann1.Vradi03g04110/vigra.VC1973A.gnm6.ann1.Vradi08g16180/vigra.VC1973A.gnm6.ann1.Vradi05g20770/vigra.VC1973A.gnm6.ann1.Vradi05g18920/vigra.VC1973A.gnm…
Biological process	GO:0006082	organic acid metabolic process	0.431238	43	vigra.VC1973A.gnm6.ann1.Vradi06g01110/novel.1022/novel.2058/vigra.VC1973A.gnm6.ann1.Vradi06g11750/vigra.VC1973A.gnm6.ann1.Vradi0393s00080/vigra.VC1973A.gnm6.ann1.Vradi01g08270/vigra.VC1973A.gnm6.ann1.Vradi06g11170/vigra.VC1973A.gnm6.ann1.Vradi01g13760/vigra.VC1973A.gnm6.ann1.Vradi01g05710/vigra.VC1973A.gnm6.ann1.Vradi01g06780/vigra.VC1973A.gnm6.ann1.Vradi01g00090/vigra.VC1973A.gnm6.ann1.Vradi08g1…
Biological process	GO:0043436	oxoacid metabolic process	0.431238	43	vigra.VC1973A.gnm6.ann1.Vradi06g01110/novel.1022/novel.2058/vigra.VC1973A.gnm6.ann1.Vradi06g11750/vigra.VC1973A.gnm6.ann1.Vradi0393s00080/vigra.VC1973A.gnm6.ann1.Vradi01g08270/vigra.VC1973A.gnm6.ann1.Vradi06g11170/vigra.VC1973A.gnm6.ann1.Vradi01g13760/vigra.VC1973A.gnm6.ann1.Vradi01g05710/vigra.VC1973A.gnm6.ann1.Vradi01g06780/vigra.VC1973A.gnm6.ann1.Vradi01g00090/vigra.VC1973A.gnm6.ann1.Vradi08g1…
Biological process	GO:0006022	aminoglycan metabolic process	0.434499	3	vigra.VC1973A.gnm6.ann1.Vradi05g15830/vigra.VC1973A.gnm6.ann1.Vradi08g16140/vigra.VC1973A.gnm6.ann1.Vradi0656s00030
Biological process	GO:0042546	cell wall biogenesis	0.434499	3	vigra.VC1973A.gnm6.ann1.Vradi0190s00230/vigra.VC1973A.gnm6.ann1.Vradi02g13670/vigra.VC1973A.gnm6.ann1.Vradi0190s00060
Biological process	GO:0006732	coenzyme metabolic process	0.437993	16	vigra.VC1973A.gnm6.ann1.Vradi11g07350/vigra.VC1973A.gnm6.ann1.Vradi0393s00080/vigra.VC1973A.gnm6.ann1.Vradi01g06780/vigra.VC1973A.gnm6.ann1.Vradi01g00090/vigra.VC1973A.gnm6.ann1.Vradi08g18320/vigra.VC1973A.gnm6.ann1.Vradi03g04110/vigra.VC1973A.gnm6.ann1.Vradi08g16180/vigra.VC1973A.gnm6.ann1.Vradi05g20770/vigra.VC1973A.gnm6.ann1.Vradi05g18920/vigra.VC1973A.gnm6.ann1.Vradi08g06540/vigra.VC1973A.gnm…
Biological process	GO:0009690	cytokinin metabolic process	0.452407	2	vigra.VC1973A.gnm6.ann1.Vradi05g13490/vigra.VC1973A.gnm6.ann1.Vradi05g02400
Biological process	GO:0010817	regulation of hormone levels	0.452407	2	vigra.VC1973A.gnm6.ann1.Vradi05g13490/vigra.VC1973A.gnm6.ann1.Vradi05g02400
Biological process	GO:0010876	lipid localization	0.452407	2	vigra.VC1973A.gnm6.ann1.Vradi06g09220/vigra.VC1973A.gnm6.ann1.Vradi0183s00060
Biological process	GO:0034754	cellular hormone metabolic process	0.452407	2	vigra.VC1973A.gnm6.ann1.Vradi05g13490/vigra.VC1973A.gnm6.ann1.Vradi05g02400
Biological process	GO:0042445	hormone metabolic process	0.452407	2	vigra.VC1973A.gnm6.ann1.Vradi05g13490/vigra.VC1973A.gnm6.ann1.Vradi05g02400
Biological process	GO:0006811	ion transport	0.474584	47	vigra.VC1973A.gnm6.ann1.Vradi01g13100/novel.48/vigra.VC1973A.gnm6.ann1.Vradi0327s00040/vigra.VC1973A.gnm6.ann1.Vradi07g30860/vigra.VC1973A.gnm6.ann1.Vradi03g03650/vigra.VC1973A.gnm6.ann1.Vradi05g09900/vigra.VC1973A.gnm6.ann1.Vradi04g01890/novel.49/vigra.VC1973A.gnm6.ann1.Vradi01g13920/vigra.VC1973A.gnm6.ann1.Vradi02g02910/vigra.VC1973A.gnm6.ann1.Vradi10g07550/vigra.VC1973A.gnm6.ann1.Vradi08g06770…
Biological process	GO:0090407	organophosphate biosynthetic process	0.476959	20	vigra.VC1973A.gnm6.ann1.Vradi01g13100/vigra.VC1973A.gnm6.ann1.Vradi0393s00080/vigra.VC1973A.gnm6.ann1.Vradi0606s00010/vigra.VC1973A.gnm6.ann1.Vradi01g06780/vigra.VC1973A.gnm6.ann1.Vradi01g00090/vigra.VC1973A.gnm6.ann1.Vradi08g18320/vigra.VC1973A.gnm6.ann1.Vradi03g04110/vigra.VC1973A.gnm6.ann1.Vradi08g16180/vigra.VC1973A.gnm6.ann1.Vradi05g20770/vigra.VC1973A.gnm6.ann1.Vradi02g03550/vigra.VC1973A.g…
Biological process	GO:0034637	cellular carbohydrate biosynthetic process	0.50159	12	vigra.VC1973A.gnm6.ann1.Vradi0183s00080/vigra.VC1973A.gnm6.ann1.Vradi06g07880/vigra.VC1973A.gnm6.ann1.Vradi07g12720/vigra.VC1973A.gnm6.ann1.Vradi10g02700/vigra.VC1973A.gnm6.ann1.Vradi02g01540/vigra.VC1973A.gnm6.ann1.Vradi05g03980/vigra.VC1973A.gnm6.ann1.Vradi0190s00080/vigra.VC1973A.gnm6.ann1.Vradi01g11990/novel.891/vigra.VC1973A.gnm6.ann1.Vradi03g06310/vigra.VC1973A.gnm6.ann1.Vradi1089s00010/vig…
Biological process	GO:0015980	energy derivation by oxidation of organic compounds	0.504429	2	vigra.VC1973A.gnm6.ann1.Vradi0236s00040/vigra.VC1973A.gnm6.ann1.Vradi0023s00540
Biological process	GO:0045333	cellular respiration	0.504429	2	vigra.VC1973A.gnm6.ann1.Vradi0236s00040/vigra.VC1973A.gnm6.ann1.Vradi0023s00540
Biological process	GO:0007049	cell cycle	0.508452	6	vigra.VC1973A.gnm6.ann1.Vradi08g15490/novel.1963/vigra.VC1973A.gnm6.ann1.Vradi0171s00140/vigra.VC1973A.gnm6.ann1.Vradi02g06260/vigra.VC1973A.gnm6.ann1.Vradi08g15880/vigra.VC1973A.gnm6.ann1.Vradi02g07150
Biological process	GO:0006753	nucleoside phosphate metabolic process	0.513122	18	vigra.VC1973A.gnm6.ann1.Vradi01g13100/vigra.VC1973A.gnm6.ann1.Vradi11g07350/vigra.VC1973A.gnm6.ann1.Vradi0393s00080/vigra.VC1973A.gnm6.ann1.Vradi01g06780/vigra.VC1973A.gnm6.ann1.Vradi01g00090/vigra.VC1973A.gnm6.ann1.Vradi08g18320/vigra.VC1973A.gnm6.ann1.Vradi03g04110/vigra.VC1973A.gnm6.ann1.Vradi08g16180/vigra.VC1973A.gnm6.ann1.Vradi05g20770/vigra.VC1973A.gnm6.ann1.Vradi05g18920/vigra.VC1973A.gnm…
Biological process	GO:0033014	tetrapyrrole biosynthetic process	0.51609	3	vigra.VC1973A.gnm6.ann1.Vradi06g00200/vigra.VC1973A.gnm6.ann1.Vradi05g12870/vigra.VC1973A.gnm6.ann1.Vradi06g08000
Biological process	GO:0008037	cell recognition	0.539854	7	vigra.VC1973A.gnm6.ann1.Vradi05g22930/vigra.VC1973A.gnm6.ann1.Vradi02g10600/vigra.VC1973A.gnm6.ann1.Vradi0310s00070/vigra.VC1973A.gnm6.ann1.Vradi02g11420/vigra.VC1973A.gnm6.ann1.Vradi07g15610/vigra.VC1973A.gnm6.ann1.Vradi10g11640/vigra.VC1973A.gnm6.ann1.Vradi11g11750
Biological process	GO:0009856	pollination	0.539854	7	vigra.VC1973A.gnm6.ann1.Vradi05g22930/vigra.VC1973A.gnm6.ann1.Vradi02g10600/vigra.VC1973A.gnm6.ann1.Vradi0310s00070/vigra.VC1973A.gnm6.ann1.Vradi02g11420/vigra.VC1973A.gnm6.ann1.Vradi07g15610/vigra.VC1973A.gnm6.ann1.Vradi10g11640/vigra.VC1973A.gnm6.ann1.Vradi11g11750
Biological process	GO:0009875	pollen-pistil interaction	0.539854	7	vigra.VC1973A.gnm6.ann1.Vradi05g22930/vigra.VC1973A.gnm6.ann1.Vradi02g10600/vigra.VC1973A.gnm6.ann1.Vradi0310s00070/vigra.VC1973A.gnm6.ann1.Vradi02g11420/vigra.VC1973A.gnm6.ann1.Vradi07g15610/vigra.VC1973A.gnm6.ann1.Vradi10g11640/vigra.VC1973A.gnm6.ann1.Vradi11g11750
Biological process	GO:0044706	multi-multicellular organism process	0.539854	7	vigra.VC1973A.gnm6.ann1.Vradi05g22930/vigra.VC1973A.gnm6.ann1.Vradi02g10600/vigra.VC1973A.gnm6.ann1.Vradi0310s00070/vigra.VC1973A.gnm6.ann1.Vradi02g11420/vigra.VC1973A.gnm6.ann1.Vradi07g15610/vigra.VC1973A.gnm6.ann1.Vradi10g11640/vigra.VC1973A.gnm6.ann1.Vradi11g11750
Biological process	GO:0048544	recognition of pollen	0.539854	7	vigra.VC1973A.gnm6.ann1.Vradi05g22930/vigra.VC1973A.gnm6.ann1.Vradi02g10600/vigra.VC1973A.gnm6.ann1.Vradi0310s00070/vigra.VC1973A.gnm6.ann1.Vradi02g11420/vigra.VC1973A.gnm6.ann1.Vradi07g15610/vigra.VC1973A.gnm6.ann1.Vradi10g11640/vigra.VC1973A.gnm6.ann1.Vradi11g11750
Biological process	GO:0044283	small molecule biosynthetic process	0.543834	27	vigra.VC1973A.gnm6.ann1.Vradi06g01110/novel.1022/novel.2058/vigra.VC1973A.gnm6.ann1.Vradi0393s00080/vigra.VC1973A.gnm6.ann1.Vradi01g13760/vigra.VC1973A.gnm6.ann1.Vradi01g06780/vigra.VC1973A.gnm6.ann1.Vradi01g00090/vigra.VC1973A.gnm6.ann1.Vradi08g18320/vigra.VC1973A.gnm6.ann1.Vradi03g04110/vigra.VC1973A.gnm6.ann1.Vradi10g10840/vigra.VC1973A.gnm6.ann1.Vradi08g16180/vigra.VC1973A.gnm6.ann1.Vradi05g2…
Biological process	GO:0005985	sucrose metabolic process	0.553125	2	vigra.VC1973A.gnm6.ann1.Vradi03g06190/vigra.VC1973A.gnm6.ann1.Vradi05g01720
Biological process	GO:0006026	aminoglycan catabolic process	0.553125	2	vigra.VC1973A.gnm6.ann1.Vradi05g15830/vigra.VC1973A.gnm6.ann1.Vradi0656s00030
Biological process	GO:0006030	chitin metabolic process	0.553125	2	vigra.VC1973A.gnm6.ann1.Vradi05g15830/vigra.VC1973A.gnm6.ann1.Vradi0656s00030
Biological process	GO:0006032	chitin catabolic process	0.553125	2	vigra.VC1973A.gnm6.ann1.Vradi05g15830/vigra.VC1973A.gnm6.ann1.Vradi0656s00030
Biological process	GO:0006040	amino sugar metabolic process	0.553125	2	vigra.VC1973A.gnm6.ann1.Vradi05g15830/vigra.VC1973A.gnm6.ann1.Vradi0656s00030
Biological process	GO:0016998	cell wall macromolecule catabolic process	0.553125	2	vigra.VC1973A.gnm6.ann1.Vradi05g15830/vigra.VC1973A.gnm6.ann1.Vradi0656s00030
Biological process	GO:0044036	cell wall macromolecule metabolic process	0.553125	2	vigra.VC1973A.gnm6.ann1.Vradi05g15830/vigra.VC1973A.gnm6.ann1.Vradi0656s00030
Biological process	GO:0046348	amino sugar catabolic process	0.553125	2	vigra.VC1973A.gnm6.ann1.Vradi05g15830/vigra.VC1973A.gnm6.ann1.Vradi0656s00030
Biological process	GO:1901071	glucosamine-containing compound metabolic process	0.553125	2	vigra.VC1973A.gnm6.ann1.Vradi05g15830/vigra.VC1973A.gnm6.ann1.Vradi0656s00030
Biological process	GO:1901072	glucosamine-containing compound catabolic process	0.553125	2	vigra.VC1973A.gnm6.ann1.Vradi05g15830/vigra.VC1973A.gnm6.ann1.Vradi0656s00030
Biological process	GO:0006887	exocytosis	0.561474	6	novel.1642/novel.1782/vigra.VC1973A.gnm6.ann1.Vradi04g02380/vigra.VC1973A.gnm6.ann1.Vradi08g04720/vigra.VC1973A.gnm6.ann1.Vradi08g07950/vigra.VC1973A.gnm6.ann1.Vradi0146s00210
Biological process	GO:0015979	photosynthesis	0.561474	6	vigra.VC1973A.gnm6.ann1.Vradi09g05500/vigra.VC1973A.gnm6.ann1.Vradi0189s00020/vigra.VC1973A.gnm6.ann1.Vradi08g08520/vigra.VC1973A.gnm6.ann1.Vradi0184s00050/vigra.VC1973A.gnm6.ann1.Vradi0315s00210/vigra.VC1973A.gnm6.ann1.Vradi08g18590
Biological process	GO:0032940	secretion by cell	0.561474	6	novel.1642/novel.1782/vigra.VC1973A.gnm6.ann1.Vradi04g02380/vigra.VC1973A.gnm6.ann1.Vradi08g04720/vigra.VC1973A.gnm6.ann1.Vradi08g07950/vigra.VC1973A.gnm6.ann1.Vradi0146s00210
Biological process	GO:0046903	secretion	0.561474	6	novel.1642/novel.1782/vigra.VC1973A.gnm6.ann1.Vradi04g02380/vigra.VC1973A.gnm6.ann1.Vradi08g04720/vigra.VC1973A.gnm6.ann1.Vradi08g07950/vigra.VC1973A.gnm6.ann1.Vradi0146s00210
Biological process	GO:0051704	multi-organism process	0.566449	8	vigra.VC1973A.gnm6.ann1.Vradi05g22930/vigra.VC1973A.gnm6.ann1.Vradi02g10600/vigra.VC1973A.gnm6.ann1.Vradi08g11000/vigra.VC1973A.gnm6.ann1.Vradi0310s00070/vigra.VC1973A.gnm6.ann1.Vradi02g11420/vigra.VC1973A.gnm6.ann1.Vradi07g15610/vigra.VC1973A.gnm6.ann1.Vradi10g11640/vigra.VC1973A.gnm6.ann1.Vradi11g11750
Biological process	GO:0009117	nucleotide metabolic process	0.571207	17	vigra.VC1973A.gnm6.ann1.Vradi01g13100/vigra.VC1973A.gnm6.ann1.Vradi11g07350/vigra.VC1973A.gnm6.ann1.Vradi0393s00080/vigra.VC1973A.gnm6.ann1.Vradi01g06780/vigra.VC1973A.gnm6.ann1.Vradi01g00090/vigra.VC1973A.gnm6.ann1.Vradi08g18320/vigra.VC1973A.gnm6.ann1.Vradi03g04110/vigra.VC1973A.gnm6.ann1.Vradi08g16180/vigra.VC1973A.gnm6.ann1.Vradi05g20770/vigra.VC1973A.gnm6.ann1.Vradi05g18920/vigra.VC1973A.gnm…
Biological process	GO:0030001	metal ion transport	0.586352	17	vigra.VC1973A.gnm6.ann1.Vradi07g30860/vigra.VC1973A.gnm6.ann1.Vradi03g03650/vigra.VC1973A.gnm6.ann1.Vradi04g01890/vigra.VC1973A.gnm6.ann1.Vradi01g13920/vigra.VC1973A.gnm6.ann1.Vradi02g02910/vigra.VC1973A.gnm6.ann1.Vradi10g07550/vigra.VC1973A.gnm6.ann1.Vradi08g06770/vigra.VC1973A.gnm6.ann1.Vradi08g02890/vigra.VC1973A.gnm6.ann1.Vradi08g18850/vigra.VC1973A.gnm6.ann1.Vradi0023s00510/vigra.VC1973A.gnm…
Biological process	GO:0015698	inorganic anion transport	0.58796	4	vigra.VC1973A.gnm6.ann1.Vradi05g07730/vigra.VC1973A.gnm6.ann1.Vradi05g20190/vigra.VC1973A.gnm6.ann1.Vradi01g04240/vigra.VC1973A.gnm6.ann1.Vradi06g07640
Biological process	GO:1901136	carbohydrate derivative catabolic process	0.590908	3	vigra.VC1973A.gnm6.ann1.Vradi05g15830/vigra.VC1973A.gnm6.ann1.Vradi0656s00030/vigra.VC1973A.gnm6.ann1.Vradi0154s00190
Biological process	GO:0019752	carboxylic acid metabolic process	0.595102	40	vigra.VC1973A.gnm6.ann1.Vradi06g01110/novel.1022/novel.2058/vigra.VC1973A.gnm6.ann1.Vradi06g11750/vigra.VC1973A.gnm6.ann1.Vradi0393s00080/vigra.VC1973A.gnm6.ann1.Vradi01g13760/vigra.VC1973A.gnm6.ann1.Vradi01g05710/vigra.VC1973A.gnm6.ann1.Vradi01g06780/vigra.VC1973A.gnm6.ann1.Vradi01g00090/vigra.VC1973A.gnm6.ann1.Vradi08g18320/vigra.VC1973A.gnm6.ann1.Vradi03g02630/vigra.VC1973A.gnm6.ann1.Vradi0149…
Biological process	GO:0055086	nucleobase-containing small molecule metabolic process	0.605878	20	vigra.VC1973A.gnm6.ann1.Vradi01g13100/vigra.VC1973A.gnm6.ann1.Vradi05g08880/vigra.VC1973A.gnm6.ann1.Vradi11g07350/vigra.VC1973A.gnm6.ann1.Vradi0393s00080/vigra.VC1973A.gnm6.ann1.Vradi01g06780/vigra.VC1973A.gnm6.ann1.Vradi01g00090/vigra.VC1973A.gnm6.ann1.Vradi08g18320/vigra.VC1973A.gnm6.ann1.Vradi03g04110/vigra.VC1973A.gnm6.ann1.Vradi08g16180/vigra.VC1973A.gnm6.ann1.Vradi05g20770/vigra.VC1973A.gnm…
Biological process	GO:0006820	anion transport	0.61002	10	vigra.VC1973A.gnm6.ann1.Vradi0327s00040/vigra.VC1973A.gnm6.ann1.Vradi05g09900/vigra.VC1973A.gnm6.ann1.Vradi0223s00160/vigra.VC1973A.gnm6.ann1.Vradi07g18340/vigra.VC1973A.gnm6.ann1.Vradi05g07730/vigra.VC1973A.gnm6.ann1.Vradi05g20190/vigra.VC1973A.gnm6.ann1.Vradi05g19980/vigra.VC1973A.gnm6.ann1.Vradi01g04240/vigra.VC1973A.gnm6.ann1.Vradi08g22410/vigra.VC1973A.gnm6.ann1.Vradi06g07640
Biological process	GO:0006073	cellular glucan metabolic process	0.611177	12	vigra.VC1973A.gnm6.ann1.Vradi04g04000/vigra.VC1973A.gnm6.ann1.Vradi10g02700/vigra.VC1973A.gnm6.ann1.Vradi02g01540/vigra.VC1973A.gnm6.ann1.Vradi02g06230/vigra.VC1973A.gnm6.ann1.Vradi0190s00080/vigra.VC1973A.gnm6.ann1.Vradi01g11990/vigra.VC1973A.gnm6.ann1.Vradi0450s00100/vigra.VC1973A.gnm6.ann1.Vradi0073s00060/vigra.VC1973A.gnm6.ann1.Vradi03g06310/vigra.VC1973A.gnm6.ann1.Vradi1089s00010/vigra.VC197…
Biological process	GO:0044042	glucan metabolic process	0.611177	12	vigra.VC1973A.gnm6.ann1.Vradi04g04000/vigra.VC1973A.gnm6.ann1.Vradi10g02700/vigra.VC1973A.gnm6.ann1.Vradi02g01540/vigra.VC1973A.gnm6.ann1.Vradi02g06230/vigra.VC1973A.gnm6.ann1.Vradi0190s00080/vigra.VC1973A.gnm6.ann1.Vradi01g11990/vigra.VC1973A.gnm6.ann1.Vradi0450s00100/vigra.VC1973A.gnm6.ann1.Vradi0073s00060/vigra.VC1973A.gnm6.ann1.Vradi03g06310/vigra.VC1973A.gnm6.ann1.Vradi1089s00010/vigra.VC197…
Biological process	GO:0044264	cellular polysaccharide metabolic process	0.611177	12	vigra.VC1973A.gnm6.ann1.Vradi04g04000/vigra.VC1973A.gnm6.ann1.Vradi10g02700/vigra.VC1973A.gnm6.ann1.Vradi02g01540/vigra.VC1973A.gnm6.ann1.Vradi02g06230/vigra.VC1973A.gnm6.ann1.Vradi0190s00080/vigra.VC1973A.gnm6.ann1.Vradi01g11990/vigra.VC1973A.gnm6.ann1.Vradi0450s00100/vigra.VC1973A.gnm6.ann1.Vradi0073s00060/vigra.VC1973A.gnm6.ann1.Vradi03g06310/vigra.VC1973A.gnm6.ann1.Vradi1089s00010/vigra.VC197…
Biological process	GO:0016051	carbohydrate biosynthetic process	0.611975	13	vigra.VC1973A.gnm6.ann1.Vradi0183s00080/vigra.VC1973A.gnm6.ann1.Vradi06g07880/vigra.VC1973A.gnm6.ann1.Vradi07g12720/vigra.VC1973A.gnm6.ann1.Vradi10g02700/vigra.VC1973A.gnm6.ann1.Vradi02g01540/vigra.VC1973A.gnm6.ann1.Vradi05g03980/vigra.VC1973A.gnm6.ann1.Vradi0190s00080/vigra.VC1973A.gnm6.ann1.Vradi01g11990/novel.891/vigra.VC1973A.gnm6.ann1.Vradi03g06310/vigra.VC1973A.gnm6.ann1.Vradi1089s00010/vig…
Biological process	GO:0015074	DNA integration	0.62539	3	novel.1669/novel.1914/novel.2690
Biological process	GO:0006006	glucose metabolic process	0.64	2	vigra.VC1973A.gnm6.ann1.Vradi09g01700/vigra.VC1973A.gnm6.ann1.Vradi0433s00010
Biological process	GO:0006081	cellular aldehyde metabolic process	0.64	2	vigra.VC1973A.gnm6.ann1.Vradi02g03550/vigra.VC1973A.gnm6.ann1.Vradi09g09800
Biological process	GO:0015985	energy coupled proton transport, down electrochemical gradient	0.64	2	vigra.VC1973A.gnm6.ann1.Vradi01g13100/vigra.VC1973A.gnm6.ann1.Vradi0381s00060
Biological process	GO:0015986	ATP synthesis coupled proton transport	0.64	2	vigra.VC1973A.gnm6.ann1.Vradi01g13100/vigra.VC1973A.gnm6.ann1.Vradi0381s00060
Biological process	GO:0005996	monosaccharide metabolic process	0.646656	4	vigra.VC1973A.gnm6.ann1.Vradi11g10440/vigra.VC1973A.gnm6.ann1.Vradi09g01700/vigra.VC1973A.gnm6.ann1.Vradi07g01370/vigra.VC1973A.gnm6.ann1.Vradi0433s00010
Biological process	GO:0033013	tetrapyrrole metabolic process	0.657819	3	vigra.VC1973A.gnm6.ann1.Vradi06g00200/vigra.VC1973A.gnm6.ann1.Vradi05g12870/vigra.VC1973A.gnm6.ann1.Vradi06g08000
Biological process	GO:0006790	sulfur compound metabolic process	0.658417	6	vigra.VC1973A.gnm6.ann1.Vradi06g01110/vigra.VC1973A.gnm6.ann1.Vradi0544s00020/novel.1981/novel.2219/novel.931/novel.920
Biological process	GO:0030243	cellulose metabolic process	0.658417	6	vigra.VC1973A.gnm6.ann1.Vradi10g02700/vigra.VC1973A.gnm6.ann1.Vradi02g01540/vigra.VC1973A.gnm6.ann1.Vradi0190s00080/vigra.VC1973A.gnm6.ann1.Vradi01g11990/vigra.VC1973A.gnm6.ann1.Vradi03g06310/vigra.VC1973A.gnm6.ann1.Vradi1089s00010
Biological process	GO:0030244	cellulose biosynthetic process	0.658417	6	vigra.VC1973A.gnm6.ann1.Vradi10g02700/vigra.VC1973A.gnm6.ann1.Vradi02g01540/vigra.VC1973A.gnm6.ann1.Vradi0190s00080/vigra.VC1973A.gnm6.ann1.Vradi01g11990/vigra.VC1973A.gnm6.ann1.Vradi03g06310/vigra.VC1973A.gnm6.ann1.Vradi1089s00010
Biological process	GO:0051186	cofactor metabolic process	0.671442	19	vigra.VC1973A.gnm6.ann1.Vradi0544s00020/novel.1981/vigra.VC1973A.gnm6.ann1.Vradi11g07350/vigra.VC1973A.gnm6.ann1.Vradi0393s00080/vigra.VC1973A.gnm6.ann1.Vradi01g06780/vigra.VC1973A.gnm6.ann1.Vradi01g00090/vigra.VC1973A.gnm6.ann1.Vradi08g18320/vigra.VC1973A.gnm6.ann1.Vradi03g04110/vigra.VC1973A.gnm6.ann1.Vradi06g00200/vigra.VC1973A.gnm6.ann1.Vradi08g16180/vigra.VC1973A.gnm6.ann1.Vradi05g20770/vigr…
Biological process	GO:0019637	organophosphate metabolic process	0.673042	28	vigra.VC1973A.gnm6.ann1.Vradi01g13100/vigra.VC1973A.gnm6.ann1.Vradi11g07350/vigra.VC1973A.gnm6.ann1.Vradi0393s00080/vigra.VC1973A.gnm6.ann1.Vradi0606s00010/vigra.VC1973A.gnm6.ann1.Vradi01g06780/novel.1970/vigra.VC1973A.gnm6.ann1.Vradi01g00090/vigra.VC1973A.gnm6.ann1.Vradi08g18320/vigra.VC1973A.gnm6.ann1.Vradi03g04110/vigra.VC1973A.gnm6.ann1.Vradi08g16180/vigra.VC1973A.gnm6.ann1.Vradi05g20770/vigr…
Biological process	GO:0006284	base-excision repair	0.678186	2	vigra.VC1973A.gnm6.ann1.Vradi0129s00030/vigra.VC1973A.gnm6.ann1.Vradi05g18610
Biological process	GO:0016054	organic acid catabolic process	0.678186	2	vigra.VC1973A.gnm6.ann1.Vradi0149s00060/vigra.VC1973A.gnm6.ann1.Vradi07g19010
Biological process	GO:0046395	carboxylic acid catabolic process	0.678186	2	vigra.VC1973A.gnm6.ann1.Vradi0149s00060/vigra.VC1973A.gnm6.ann1.Vradi07g19010
Biological process	GO:0048583	regulation of response to stimulus	0.678186	2	vigra.VC1973A.gnm6.ann1.Vradi09g09490/vigra.VC1973A.gnm6.ann1.Vradi08g11000
Biological process	GO:0046488	phosphatidylinositol metabolic process	0.68045	6	vigra.VC1973A.gnm6.ann1.Vradi0606s00010/novel.1970/vigra.VC1973A.gnm6.ann1.Vradi10g11530/vigra.VC1973A.gnm6.ann1.Vradi10g11340/vigra.VC1973A.gnm6.ann1.Vradi10g07520/vigra.VC1973A.gnm6.ann1.Vradi07g15880
Biological process	GO:0006650	glycerophospholipid metabolic process	0.70154	6	vigra.VC1973A.gnm6.ann1.Vradi0606s00010/novel.1970/vigra.VC1973A.gnm6.ann1.Vradi10g11530/vigra.VC1973A.gnm6.ann1.Vradi10g11340/vigra.VC1973A.gnm6.ann1.Vradi10g07520/vigra.VC1973A.gnm6.ann1.Vradi07g15880
Biological process	GO:0016567	protein ubiquitination	0.713699	7	vigra.VC1973A.gnm6.ann1.Vradi08g01140/vigra.VC1973A.gnm6.ann1.Vradi04g11500/vigra.VC1973A.gnm6.ann1.Vradi0091s00190/vigra.VC1973A.gnm6.ann1.Vradi06g06570/vigra.VC1973A.gnm6.ann1.Vradi07g15560/vigra.VC1973A.gnm6.ann1.Vradi02g07300/vigra.VC1973A.gnm6.ann1.Vradi0234s00030
Biological process	GO:0032446	protein modification by small protein conjugation	0.713699	7	vigra.VC1973A.gnm6.ann1.Vradi08g01140/vigra.VC1973A.gnm6.ann1.Vradi04g11500/vigra.VC1973A.gnm6.ann1.Vradi0091s00190/vigra.VC1973A.gnm6.ann1.Vradi06g06570/vigra.VC1973A.gnm6.ann1.Vradi07g15560/vigra.VC1973A.gnm6.ann1.Vradi02g07300/vigra.VC1973A.gnm6.ann1.Vradi0234s00030
Biological process	GO:0019318	hexose metabolic process	0.716457	3	vigra.VC1973A.gnm6.ann1.Vradi09g01700/vigra.VC1973A.gnm6.ann1.Vradi07g01370/vigra.VC1973A.gnm6.ann1.Vradi0433s00010
Biological process	GO:0005976	polysaccharide metabolic process	0.733042	13	vigra.VC1973A.gnm6.ann1.Vradi04g04000/vigra.VC1973A.gnm6.ann1.Vradi10g02700/vigra.VC1973A.gnm6.ann1.Vradi02g01540/vigra.VC1973A.gnm6.ann1.Vradi02g06230/vigra.VC1973A.gnm6.ann1.Vradi0190s00080/vigra.VC1973A.gnm6.ann1.Vradi01g11990/vigra.VC1973A.gnm6.ann1.Vradi0450s00100/vigra.VC1973A.gnm6.ann1.Vradi0073s00060/vigra.VC1973A.gnm6.ann1.Vradi03g06310/vigra.VC1973A.gnm6.ann1.Vradi1089s00010/vigra.VC197…
Biological process	GO:0006644	phospholipid metabolic process	0.741719	8	vigra.VC1973A.gnm6.ann1.Vradi0606s00010/novel.1970/vigra.VC1973A.gnm6.ann1.Vradi10g11530/vigra.VC1973A.gnm6.ann1.Vradi02g03550/vigra.VC1973A.gnm6.ann1.Vradi10g11340/novel.891/vigra.VC1973A.gnm6.ann1.Vradi10g07520/vigra.VC1973A.gnm6.ann1.Vradi07g15880
Biological process	GO:0006352	DNA-templated transcription, initiation	0.742711	3	vigra.VC1973A.gnm6.ann1.Vradi02g01250/vigra.VC1973A.gnm6.ann1.Vradi07g24390/vigra.VC1973A.gnm6.ann1.Vradi06g10780
Biological process	GO:0032501	multicellular organismal process	0.773073	8	vigra.VC1973A.gnm6.ann1.Vradi05g22930/vigra.VC1973A.gnm6.ann1.Vradi02g10600/vigra.VC1973A.gnm6.ann1.Vradi0310s00070/vigra.VC1973A.gnm6.ann1.Vradi02g11420/vigra.VC1973A.gnm6.ann1.Vradi07g15610/vigra.VC1973A.gnm6.ann1.Vradi10g11640/vigra.VC1973A.gnm6.ann1.Vradi11g11750/novel.947
Biological process	GO:0042737	drug catabolic process	0.773157	2	vigra.VC1973A.gnm6.ann1.Vradi05g15830/vigra.VC1973A.gnm6.ann1.Vradi0656s00030
Biological process	GO:1901615	organic hydroxy compound metabolic process	0.798889	2	vigra.VC1973A.gnm6.ann1.Vradi09g09800/novel.891
Biological process	GO:0000096	sulfur amino acid metabolic process	0.8012	1	vigra.VC1973A.gnm6.ann1.Vradi06g01110
Biological process	GO:0006265	DNA topological change	0.8012	1	vigra.VC1973A.gnm6.ann1.Vradi05g17120
Biological process	GO:0006415	translational termination	0.8012	1	vigra.VC1973A.gnm6.ann1.Vradi08g02750
Biological process	GO:0008202	steroid metabolic process	0.8012	1	vigra.VC1973A.gnm6.ann1.Vradi05g11270
Biological process	GO:0009084	glutamine family amino acid biosynthetic process	0.8012	1	vigra.VC1973A.gnm6.ann1.Vradi10g01300
Biological process	GO:0009966	regulation of signal transduction	0.8012	1	vigra.VC1973A.gnm6.ann1.Vradi09g09490
Biological process	GO:0010646	regulation of cell communication	0.8012	1	vigra.VC1973A.gnm6.ann1.Vradi09g09490
Biological process	GO:0019220	regulation of phosphate metabolic process	0.8012	1	vigra.VC1973A.gnm6.ann1.Vradi0171s00140
Biological process	GO:0023051	regulation of signaling	0.8012	1	vigra.VC1973A.gnm6.ann1.Vradi09g09490
Biological process	GO:0031399	regulation of protein modification process	0.8012	1	vigra.VC1973A.gnm6.ann1.Vradi0171s00140
Biological process	GO:0051174	regulation of phosphorus metabolic process	0.8012	1	vigra.VC1973A.gnm6.ann1.Vradi0171s00140
Biological process	GO:0046486	glycerolipid metabolic process	0.807959	6	vigra.VC1973A.gnm6.ann1.Vradi0606s00010/novel.1970/vigra.VC1973A.gnm6.ann1.Vradi10g11530/vigra.VC1973A.gnm6.ann1.Vradi10g11340/vigra.VC1973A.gnm6.ann1.Vradi10g07520/vigra.VC1973A.gnm6.ann1.Vradi07g15880
Biological process	GO:0006413	translational initiation	0.821998	2	vigra.VC1973A.gnm6.ann1.Vradi02g09360/vigra.VC1973A.gnm6.ann1.Vradi01g11620
Biological process	GO:0044282	small molecule catabolic process	0.821998	2	vigra.VC1973A.gnm6.ann1.Vradi0149s00060/vigra.VC1973A.gnm6.ann1.Vradi07g19010
Biological process	GO:0051726	regulation of cell cycle	0.821998	2	vigra.VC1973A.gnm6.ann1.Vradi08g15490/vigra.VC1973A.gnm6.ann1.Vradi0171s00140
Biological process	GO:0000375	RNA splicing, via transesterification reactions	0.830877	1	vigra.VC1973A.gnm6.ann1.Vradi02g02240
Biological process	GO:0000377	RNA splicing, via transesterification reactions with bulged adenosine as nucleophile	0.830877	1	vigra.VC1973A.gnm6.ann1.Vradi02g02240
Biological process	GO:0000398	mRNA splicing, via spliceosome	0.830877	1	vigra.VC1973A.gnm6.ann1.Vradi02g02240
Biological process	GO:0006220	pyrimidine nucleotide metabolic process	0.830877	1	vigra.VC1973A.gnm6.ann1.Vradi07g02350
Biological process	GO:0019682	glyceraldehyde-3-phosphate metabolic process	0.830877	1	vigra.VC1973A.gnm6.ann1.Vradi02g03550
Biological process	GO:0046148	pigment biosynthetic process	0.830877	1	vigra.VC1973A.gnm6.ann1.Vradi0425s00010
Biological process	GO:0007264	small GTPase mediated signal transduction	0.839139	8	vigra.VC1973A.gnm6.ann1.Vradi09g09490/vigra.VC1973A.gnm6.ann1.Vradi01g02470/vigra.VC1973A.gnm6.ann1.Vradi08g02100/vigra.VC1973A.gnm6.ann1.Vradi01g03860/vigra.VC1973A.gnm6.ann1.Vradi09g01230/vigra.VC1973A.gnm6.ann1.Vradi07g19900/vigra.VC1973A.gnm6.ann1.Vradi0179s00300/vigra.VC1973A.gnm6.ann1.Vradi07g28290
Biological process	GO:0044281	small molecule metabolic process	0.841391	58	vigra.VC1973A.gnm6.ann1.Vradi01g13100/vigra.VC1973A.gnm6.ann1.Vradi11g10440/vigra.VC1973A.gnm6.ann1.Vradi06g01110/vigra.VC1973A.gnm6.ann1.Vradi05g08880/novel.1022/novel.2058/vigra.VC1973A.gnm6.ann1.Vradi11g07350/vigra.VC1973A.gnm6.ann1.Vradi06g11750/vigra.VC1973A.gnm6.ann1.Vradi0393s00080/vigra.VC1973A.gnm6.ann1.Vradi01g08270/vigra.VC1973A.gnm6.ann1.Vradi06g11170/vigra.VC1973A.gnm6.ann1.Vradi01g1…
Biological process	GO:0000271	polysaccharide biosynthetic process	0.848761	6	vigra.VC1973A.gnm6.ann1.Vradi10g02700/vigra.VC1973A.gnm6.ann1.Vradi02g01540/vigra.VC1973A.gnm6.ann1.Vradi0190s00080/vigra.VC1973A.gnm6.ann1.Vradi01g11990/vigra.VC1973A.gnm6.ann1.Vradi03g06310/vigra.VC1973A.gnm6.ann1.Vradi1089s00010
Biological process	GO:0009250	glucan biosynthetic process	0.848761	6	vigra.VC1973A.gnm6.ann1.Vradi10g02700/vigra.VC1973A.gnm6.ann1.Vradi02g01540/vigra.VC1973A.gnm6.ann1.Vradi0190s00080/vigra.VC1973A.gnm6.ann1.Vradi01g11990/vigra.VC1973A.gnm6.ann1.Vradi03g06310/vigra.VC1973A.gnm6.ann1.Vradi1089s00010
Biological process	GO:0033692	cellular polysaccharide biosynthetic process	0.848761	6	vigra.VC1973A.gnm6.ann1.Vradi10g02700/vigra.VC1973A.gnm6.ann1.Vradi02g01540/vigra.VC1973A.gnm6.ann1.Vradi0190s00080/vigra.VC1973A.gnm6.ann1.Vradi01g11990/vigra.VC1973A.gnm6.ann1.Vradi03g06310/vigra.VC1973A.gnm6.ann1.Vradi1089s00010
Biological process	GO:0051273	beta-glucan metabolic process	0.848761	6	vigra.VC1973A.gnm6.ann1.Vradi10g02700/vigra.VC1973A.gnm6.ann1.Vradi02g01540/vigra.VC1973A.gnm6.ann1.Vradi0190s00080/vigra.VC1973A.gnm6.ann1.Vradi01g11990/vigra.VC1973A.gnm6.ann1.Vradi03g06310/vigra.VC1973A.gnm6.ann1.Vradi1089s00010
Biological process	GO:0051274	beta-glucan biosynthetic process	0.848761	6	vigra.VC1973A.gnm6.ann1.Vradi10g02700/vigra.VC1973A.gnm6.ann1.Vradi02g01540/vigra.VC1973A.gnm6.ann1.Vradi0190s00080/vigra.VC1973A.gnm6.ann1.Vradi01g11990/vigra.VC1973A.gnm6.ann1.Vradi03g06310/vigra.VC1973A.gnm6.ann1.Vradi1089s00010
Biological process	GO:1901137	carbohydrate derivative biosynthetic process	0.849787	18	vigra.VC1973A.gnm6.ann1.Vradi01g13100/vigra.VC1973A.gnm6.ann1.Vradi0393s00080/vigra.VC1973A.gnm6.ann1.Vradi0606s00010/vigra.VC1973A.gnm6.ann1.Vradi07g20700/vigra.VC1973A.gnm6.ann1.Vradi01g06780/vigra.VC1973A.gnm6.ann1.Vradi01g00090/vigra.VC1973A.gnm6.ann1.Vradi08g18320/vigra.VC1973A.gnm6.ann1.Vradi03g04110/vigra.VC1973A.gnm6.ann1.Vradi08g16180/vigra.VC1973A.gnm6.ann1.Vradi05g20770/vigra.VC1973A.g…
Biological process	GO:1902600	proton transmembrane transport	0.853716	4	vigra.VC1973A.gnm6.ann1.Vradi01g13100/novel.1477/vigra.VC1973A.gnm6.ann1.Vradi0381s00060/vigra.VC1973A.gnm6.ann1.Vradi07g07110
Biological process	GO:0006835	dicarboxylic acid transport	0.856128	1	vigra.VC1973A.gnm6.ann1.Vradi08g22410
Biological process	GO:0010629	negative regulation of gene expression	0.856128	1	vigra.VC1973A.gnm6.ann1.Vradi02g03760
Biological process	GO:0015740	C4-dicarboxylate transport	0.856128	1	vigra.VC1973A.gnm6.ann1.Vradi08g22410
Biological process	GO:0015743	malate transport	0.856128	1	vigra.VC1973A.gnm6.ann1.Vradi08g22410
Biological process	GO:0022411	cellular component disassembly	0.856128	1	vigra.VC1973A.gnm6.ann1.Vradi08g02750
Biological process	GO:0032984	protein-containing complex disassembly	0.856128	1	vigra.VC1973A.gnm6.ann1.Vradi08g02750
Biological process	GO:0043624	cellular protein complex disassembly	0.856128	1	vigra.VC1973A.gnm6.ann1.Vradi08g02750
Biological process	GO:0048523	negative regulation of cellular process	0.856128	1	vigra.VC1973A.gnm6.ann1.Vradi08g15490
Biological process	GO:0003333	amino acid transmembrane transport	0.86118	2	vigra.VC1973A.gnm6.ann1.Vradi0327s00040/vigra.VC1973A.gnm6.ann1.Vradi07g18340
Biological process	GO:0006865	amino acid transport	0.86118	2	vigra.VC1973A.gnm6.ann1.Vradi0327s00040/vigra.VC1973A.gnm6.ann1.Vradi07g18340
Biological process	GO:0016043	cellular component organization	0.87263	27	vigra.VC1973A.gnm6.ann1.Vradi08g06850/vigra.VC1973A.gnm6.ann1.Vradi07g27870/vigra.VC1973A.gnm6.ann1.Vradi08g02750/vigra.VC1973A.gnm6.ann1.Vradi09g09290/novel.1981/vigra.VC1973A.gnm6.ann1.Vradi07g28720/vigra.VC1973A.gnm6.ann1.Vradi10g07360/novel.156/vigra.VC1973A.gnm6.ann1.Vradi05g21610/vigra.VC1973A.gnm6.ann1.Vradi11g00490/vigra.VC1973A.gnm6.ann1.Vradi09g09280/vigra.VC1973A.gnm6.ann1.Vradi0190s00…
Biological process	GO:0006576	cellular biogenic amine metabolic process	0.877611	1	vigra.VC1973A.gnm6.ann1.Vradi05g19040
Biological process	GO:0006778	porphyrin-containing compound metabolic process	0.877611	1	vigra.VC1973A.gnm6.ann1.Vradi06g00200
Biological process	GO:0009064	glutamine family amino acid metabolic process	0.877611	1	vigra.VC1973A.gnm6.ann1.Vradi10g01300
Biological process	GO:0009073	aromatic amino acid family biosynthetic process	0.877611	1	vigra.VC1973A.gnm6.ann1.Vradi01g01400
Biological process	GO:0009892	negative regulation of metabolic process	0.877611	1	vigra.VC1973A.gnm6.ann1.Vradi02g03760
Biological process	GO:0010605	negative regulation of macromolecule metabolic process	0.877611	1	vigra.VC1973A.gnm6.ann1.Vradi02g03760
Biological process	GO:0033865	nucleoside bisphosphate metabolic process	0.877611	1	vigra.VC1973A.gnm6.ann1.Vradi11g07350
Biological process	GO:0033875	ribonucleoside bisphosphate metabolic process	0.877611	1	vigra.VC1973A.gnm6.ann1.Vradi11g07350
Biological process	GO:0034032	purine nucleoside bisphosphate metabolic process	0.877611	1	vigra.VC1973A.gnm6.ann1.Vradi11g07350
Biological process	GO:0044106	cellular amine metabolic process	0.877611	1	vigra.VC1973A.gnm6.ann1.Vradi05g19040
Biological process	GO:0050790	regulation of catalytic activity	0.877611	1	vigra.VC1973A.gnm6.ann1.Vradi0171s00140
Biological process	GO:0048519	negative regulation of biological process	0.877658	2	vigra.VC1973A.gnm6.ann1.Vradi02g03760/vigra.VC1973A.gnm6.ann1.Vradi08g15490
Biological process	GO:0098656	anion transmembrane transport	0.877658	2	vigra.VC1973A.gnm6.ann1.Vradi0327s00040/vigra.VC1973A.gnm6.ann1.Vradi07g18340
Biological process	GO:1903825	organic acid transmembrane transport	0.877658	2	vigra.VC1973A.gnm6.ann1.Vradi0327s00040/vigra.VC1973A.gnm6.ann1.Vradi07g18340
Biological process	GO:1905039	carboxylic acid transmembrane transport	0.877658	2	vigra.VC1973A.gnm6.ann1.Vradi0327s00040/vigra.VC1973A.gnm6.ann1.Vradi07g18340
Biological process	GO:0006643	membrane lipid metabolic process	0.888894	3	vigra.VC1973A.gnm6.ann1.Vradi0606s00010/vigra.VC1973A.gnm6.ann1.Vradi07g20700/vigra.VC1973A.gnm6.ann1.Vradi07g27370
Biological process	GO:0015988	energy coupled proton transmembrane transport, against electrochemical gradient	0.892312	2	novel.1477/vigra.VC1973A.gnm6.ann1.Vradi07g07110
Biological process	GO:0015991	ATP hydrolysis coupled proton transport	0.892312	2	novel.1477/vigra.VC1973A.gnm6.ann1.Vradi07g07110
Biological process	GO:0090662	ATP hydrolysis coupled transmembrane transport	0.892312	2	novel.1477/vigra.VC1973A.gnm6.ann1.Vradi07g07110
Biological process	GO:0099131	ATP hydrolysis coupled ion transmembrane transport	0.892312	2	novel.1477/vigra.VC1973A.gnm6.ann1.Vradi07g07110
Biological process	GO:0099132	ATP hydrolysis coupled cation transmembrane transport	0.892312	2	novel.1477/vigra.VC1973A.gnm6.ann1.Vradi07g07110
Biological process	GO:0009605	response to external stimulus	0.895889	1	vigra.VC1973A.gnm6.ann1.Vradi08g11000
Biological process	GO:0032268	regulation of cellular protein metabolic process	0.895889	1	vigra.VC1973A.gnm6.ann1.Vradi0171s00140
Biological process	GO:0065009	regulation of molecular function	0.895889	1	vigra.VC1973A.gnm6.ann1.Vradi0171s00140
Biological process	GO:0007010	cytoskeleton organization	0.905321	2	vigra.VC1973A.gnm6.ann1.Vradi10g07360/vigra.VC1973A.gnm6.ann1.Vradi07g22430
Biological process	GO:0009116	nucleoside metabolic process	0.905321	2	vigra.VC1973A.gnm6.ann1.Vradi05g08880/vigra.VC1973A.gnm6.ann1.Vradi01g02890
Biological process	GO:1901657	glycosyl compound metabolic process	0.905321	2	vigra.VC1973A.gnm6.ann1.Vradi05g08880/vigra.VC1973A.gnm6.ann1.Vradi01g02890
Biological process	GO:0015711	organic anion transport	0.911215	3	vigra.VC1973A.gnm6.ann1.Vradi0327s00040/vigra.VC1973A.gnm6.ann1.Vradi07g18340/vigra.VC1973A.gnm6.ann1.Vradi08g22410
Biological process	GO:0015849	organic acid transport	0.911215	3	vigra.VC1973A.gnm6.ann1.Vradi0327s00040/vigra.VC1973A.gnm6.ann1.Vradi07g18340/vigra.VC1973A.gnm6.ann1.Vradi08g22410
Biological process	GO:0046942	carboxylic acid transport	0.911215	3	vigra.VC1973A.gnm6.ann1.Vradi0327s00040/vigra.VC1973A.gnm6.ann1.Vradi07g18340/vigra.VC1973A.gnm6.ann1.Vradi08g22410
Biological process	GO:0000272	polysaccharide catabolic process	0.911439	1	vigra.VC1973A.gnm6.ann1.Vradi07g12000
Biological process	GO:0008380	RNA splicing	0.911439	1	vigra.VC1973A.gnm6.ann1.Vradi02g02240
Biological process	GO:0016226	iron-sulfur cluster assembly	0.911439	1	novel.1981
Biological process	GO:0019751	polyol metabolic process	0.911439	1	novel.891
Biological process	GO:0031163	metallo-sulfur cluster assembly	0.911439	1	novel.1981
Biological process	GO:0042440	pigment metabolic process	0.911439	1	vigra.VC1973A.gnm6.ann1.Vradi0425s00010
Biological process	GO:1901135	carbohydrate derivative metabolic process	0.921229	25	vigra.VC1973A.gnm6.ann1.Vradi01g13100/vigra.VC1973A.gnm6.ann1.Vradi05g08880/vigra.VC1973A.gnm6.ann1.Vradi05g15830/vigra.VC1973A.gnm6.ann1.Vradi11g07350/vigra.VC1973A.gnm6.ann1.Vradi0393s00080/vigra.VC1973A.gnm6.ann1.Vradi0606s00010/vigra.VC1973A.gnm6.ann1.Vradi07g20700/vigra.VC1973A.gnm6.ann1.Vradi01g06780/vigra.VC1973A.gnm6.ann1.Vradi01g00090/vigra.VC1973A.gnm6.ann1.Vradi08g18320/vigra.VC1973A.g…
Biological process	GO:0006066	alcohol metabolic process	0.924668	1	novel.891
Biological process	GO:0051246	regulation of protein metabolic process	0.924668	1	vigra.VC1973A.gnm6.ann1.Vradi0171s00140
Biological process	GO:0072528	pyrimidine-containing compound biosynthetic process	0.924668	1	vigra.VC1973A.gnm6.ann1.Vradi07g02350
Biological process	GO:0006364	rRNA processing	0.927047	2	novel.2796/vigra.VC1973A.gnm6.ann1.Vradi06g12360
Biological process	GO:0009247	glycolipid biosynthetic process	0.927047	2	vigra.VC1973A.gnm6.ann1.Vradi0606s00010/vigra.VC1973A.gnm6.ann1.Vradi07g20700
Biological process	GO:0016072	rRNA metabolic process	0.927047	2	novel.2796/vigra.VC1973A.gnm6.ann1.Vradi06g12360
Biological process	GO:0046467	membrane lipid biosynthetic process	0.927047	2	vigra.VC1973A.gnm6.ann1.Vradi0606s00010/vigra.VC1973A.gnm6.ann1.Vradi07g20700
Biological process	GO:0071103	DNA conformation change	0.927047	2	vigra.VC1973A.gnm6.ann1.Vradi05g17120/vigra.VC1973A.gnm6.ann1.Vradi02g07150
Biological process	GO:0008654	phospholipid biosynthetic process	0.929385	3	vigra.VC1973A.gnm6.ann1.Vradi0606s00010/vigra.VC1973A.gnm6.ann1.Vradi02g03550/novel.891
Biological process	GO:0007154	cell communication	0.935516	42	vigra.VC1973A.gnm6.ann1.Vradi09g06980/novel.2763/vigra.VC1973A.gnm6.ann1.Vradi09g09490/vigra.VC1973A.gnm6.ann1.Vradi01g02470/novel.3119/novel.779/novel.2034/vigra.VC1973A.gnm6.ann1.Vradi07g04750/vigra.VC1973A.gnm6.ann1.Vradi08g02100/novel.2896/vigra.VC1973A.gnm6.ann1.Vradi0198s00180/vigra.VC1973A.gnm6.ann1.Vradi05g22930/novel.2654/vigra.VC1973A.gnm6.ann1.Vradi02g10600/vigra.VC1973A.gnm6.ann1.Vrad…
Biological process	GO:0006323	DNA packaging	0.935923	1	vigra.VC1973A.gnm6.ann1.Vradi02g07150
Biological process	GO:0006664	glycolipid metabolic process	0.936056	2	vigra.VC1973A.gnm6.ann1.Vradi0606s00010/vigra.VC1973A.gnm6.ann1.Vradi07g20700
Biological process	GO:1903509	liposaccharide metabolic process	0.936056	2	vigra.VC1973A.gnm6.ann1.Vradi0606s00010/vigra.VC1973A.gnm6.ann1.Vradi07g20700
Biological process	GO:0007165	signal transduction	0.941111	35	vigra.VC1973A.gnm6.ann1.Vradi09g06980/novel.2763/vigra.VC1973A.gnm6.ann1.Vradi09g09490/vigra.VC1973A.gnm6.ann1.Vradi01g02470/novel.3119/novel.779/novel.2034/vigra.VC1973A.gnm6.ann1.Vradi07g04750/vigra.VC1973A.gnm6.ann1.Vradi08g02100/novel.2896/vigra.VC1973A.gnm6.ann1.Vradi0198s00180/novel.2654/vigra.VC1973A.gnm6.ann1.Vradi08g22070/novel.3120/vigra.VC1973A.gnm6.ann1.Vradi10g01550/novel.3114/vigra.…
Biological process	GO:0023052	signaling	0.941111	35	vigra.VC1973A.gnm6.ann1.Vradi09g06980/novel.2763/vigra.VC1973A.gnm6.ann1.Vradi09g09490/vigra.VC1973A.gnm6.ann1.Vradi01g02470/novel.3119/novel.779/novel.2034/vigra.VC1973A.gnm6.ann1.Vradi07g04750/vigra.VC1973A.gnm6.ann1.Vradi08g02100/novel.2896/vigra.VC1973A.gnm6.ann1.Vradi0198s00180/novel.2654/vigra.VC1973A.gnm6.ann1.Vradi08g22070/novel.3120/vigra.VC1973A.gnm6.ann1.Vradi10g01550/novel.3114/vigra.…
Biological process	GO:0006766	vitamin metabolic process	0.945497	1	vigra.VC1973A.gnm6.ann1.Vradi09g09800
Biological process	GO:0006767	water-soluble vitamin metabolic process	0.945497	1	vigra.VC1973A.gnm6.ann1.Vradi09g09800
Biological process	GO:0009110	vitamin biosynthetic process	0.945497	1	vigra.VC1973A.gnm6.ann1.Vradi09g09800
Biological process	GO:0042364	water-soluble vitamin biosynthetic process	0.945497	1	vigra.VC1973A.gnm6.ann1.Vradi09g09800
Biological process	GO:0006497	protein lipidation	0.953642	1	vigra.VC1973A.gnm6.ann1.Vradi0606s00010
Biological process	GO:0006506	GPI anchor biosynthetic process	0.953642	1	vigra.VC1973A.gnm6.ann1.Vradi0606s00010
Biological process	GO:0006575	cellular modified amino acid metabolic process	0.953642	1	vigra.VC1973A.gnm6.ann1.Vradi0544s00020
Biological process	GO:0006661	phosphatidylinositol biosynthetic process	0.953642	1	vigra.VC1973A.gnm6.ann1.Vradi0606s00010
Biological process	GO:0007275	multicellular organism development	0.953642	1	novel.947
Biological process	GO:0032502	developmental process	0.953642	1	novel.947
Biological process	GO:0042157	lipoprotein metabolic process	0.953642	1	vigra.VC1973A.gnm6.ann1.Vradi0606s00010
Biological process	GO:0042158	lipoprotein biosynthetic process	0.953642	1	vigra.VC1973A.gnm6.ann1.Vradi0606s00010
Biological process	GO:0048856	anatomical structure development	0.953642	1	novel.947
Biological process	GO:0072527	pyrimidine-containing compound metabolic process	0.953642	1	vigra.VC1973A.gnm6.ann1.Vradi07g02350
Biological process	GO:1901575	organic substance catabolic process	0.956471	20	vigra.VC1973A.gnm6.ann1.Vradi05g15830/vigra.VC1973A.gnm6.ann1.Vradi0393s00080/vigra.VC1973A.gnm6.ann1.Vradi01g06780/vigra.VC1973A.gnm6.ann1.Vradi01g00090/vigra.VC1973A.gnm6.ann1.Vradi08g18320/vigra.VC1973A.gnm6.ann1.Vradi0149s00060/vigra.VC1973A.gnm6.ann1.Vradi03g04110/vigra.VC1973A.gnm6.ann1.Vradi08g16180/vigra.VC1973A.gnm6.ann1.Vradi05g20770/vigra.VC1973A.gnm6.ann1.Vradi02g03760/vigra.VC1973A.g…
Biological process	GO:0006505	GPI anchor metabolic process	0.960571	1	vigra.VC1973A.gnm6.ann1.Vradi0606s00010
Biological process	GO:0046474	glycerophospholipid biosynthetic process	0.960571	1	vigra.VC1973A.gnm6.ann1.Vradi0606s00010
Biological process	GO:0044248	cellular catabolic process	0.961149	17	vigra.VC1973A.gnm6.ann1.Vradi05g15830/vigra.VC1973A.gnm6.ann1.Vradi0393s00080/vigra.VC1973A.gnm6.ann1.Vradi01g06780/vigra.VC1973A.gnm6.ann1.Vradi01g00090/vigra.VC1973A.gnm6.ann1.Vradi08g18320/vigra.VC1973A.gnm6.ann1.Vradi0149s00060/vigra.VC1973A.gnm6.ann1.Vradi03g04110/vigra.VC1973A.gnm6.ann1.Vradi08g16180/vigra.VC1973A.gnm6.ann1.Vradi05g20770/vigra.VC1973A.gnm6.ann1.Vradi02g03760/vigra.VC1973A.g…
Biological process	GO:0071840	cellular component organization or biogenesis	0.962354	30	vigra.VC1973A.gnm6.ann1.Vradi08g06850/vigra.VC1973A.gnm6.ann1.Vradi07g27870/vigra.VC1973A.gnm6.ann1.Vradi08g02750/vigra.VC1973A.gnm6.ann1.Vradi09g09290/novel.1981/novel.2796/vigra.VC1973A.gnm6.ann1.Vradi07g28720/vigra.VC1973A.gnm6.ann1.Vradi10g07360/novel.156/vigra.VC1973A.gnm6.ann1.Vradi05g21610/vigra.VC1973A.gnm6.ann1.Vradi11g00490/vigra.VC1973A.gnm6.ann1.Vradi09g09280/vigra.VC1973A.gnm6.ann1.V…
Biological process	GO:0009072	aromatic amino acid family metabolic process	0.966465	1	vigra.VC1973A.gnm6.ann1.Vradi01g01400
Biological process	GO:0035556	intracellular signal transduction	0.96921	14	vigra.VC1973A.gnm6.ann1.Vradi09g09490/vigra.VC1973A.gnm6.ann1.Vradi01g02470/novel.2034/vigra.VC1973A.gnm6.ann1.Vradi08g02100/vigra.VC1973A.gnm6.ann1.Vradi0198s00180/vigra.VC1973A.gnm6.ann1.Vradi06g04520/novel.2050/vigra.VC1973A.gnm6.ann1.Vradi01g03860/vigra.VC1973A.gnm6.ann1.Vradi09g01230/novel.1946/vigra.VC1973A.gnm6.ann1.Vradi07g19900/vigra.VC1973A.gnm6.ann1.Vradi11g02670/vigra.VC1973A.gnm6.ann…
Biological process	GO:0015672	monovalent inorganic cation transport	0.971284	5	vigra.VC1973A.gnm6.ann1.Vradi01g13100/vigra.VC1973A.gnm6.ann1.Vradi10g07550/novel.1477/vigra.VC1973A.gnm6.ann1.Vradi0381s00060/vigra.VC1973A.gnm6.ann1.Vradi07g07110
Biological process	GO:0070647	protein modification by small protein conjugation or removal	0.973249	7	vigra.VC1973A.gnm6.ann1.Vradi08g01140/vigra.VC1973A.gnm6.ann1.Vradi04g11500/vigra.VC1973A.gnm6.ann1.Vradi0091s00190/vigra.VC1973A.gnm6.ann1.Vradi06g06570/vigra.VC1973A.gnm6.ann1.Vradi07g15560/vigra.VC1973A.gnm6.ann1.Vradi02g07300/vigra.VC1973A.gnm6.ann1.Vradi0234s00030
Biological process	GO:0009056	catabolic process	0.973912	20	vigra.VC1973A.gnm6.ann1.Vradi05g15830/vigra.VC1973A.gnm6.ann1.Vradi0393s00080/vigra.VC1973A.gnm6.ann1.Vradi01g06780/vigra.VC1973A.gnm6.ann1.Vradi01g00090/vigra.VC1973A.gnm6.ann1.Vradi08g18320/vigra.VC1973A.gnm6.ann1.Vradi0149s00060/vigra.VC1973A.gnm6.ann1.Vradi03g04110/vigra.VC1973A.gnm6.ann1.Vradi08g16180/vigra.VC1973A.gnm6.ann1.Vradi05g20770/vigra.VC1973A.gnm6.ann1.Vradi02g03760/vigra.VC1973A.g…
Biological process	GO:0042254	ribosome biogenesis	0.975996	3	novel.2796/vigra.VC1973A.gnm6.ann1.Vradi06g04650/vigra.VC1973A.gnm6.ann1.Vradi06g12360
Biological process	GO:0006418	tRNA aminoacylation for protein translation	0.978796	3	vigra.VC1973A.gnm6.ann1.Vradi06g13610/vigra.VC1973A.gnm6.ann1.Vradi05g08580/vigra.VC1973A.gnm6.ann1.Vradi09g03900
Biological process	GO:0022613	ribonucleoprotein complex biogenesis	0.981284	3	novel.2796/vigra.VC1973A.gnm6.ann1.Vradi06g04650/vigra.VC1973A.gnm6.ann1.Vradi06g12360
Biological process	GO:0006259	DNA metabolic process	0.982749	15	vigra.VC1973A.gnm6.ann1.Vradi06g02210/novel.1669/vigra.VC1973A.gnm6.ann1.Vradi10g03240/novel.1914/vigra.VC1973A.gnm6.ann1.Vradi07g17560/vigra.VC1973A.gnm6.ann1.Vradi05g05850/vigra.VC1973A.gnm6.ann1.Vradi01g09940/vigra.VC1973A.gnm6.ann1.Vradi05g17120/vigra.VC1973A.gnm6.ann1.Vradi0129s00030/vigra.VC1973A.gnm6.ann1.Vradi02g03080/vigra.VC1973A.gnm6.ann1.Vradi03g06470/novel.2690/vigra.VC1973A.gnm6.ann…
Biological process	GO:0043038	amino acid activation	0.983492	3	vigra.VC1973A.gnm6.ann1.Vradi06g13610/vigra.VC1973A.gnm6.ann1.Vradi05g08580/vigra.VC1973A.gnm6.ann1.Vradi09g03900
Biological process	GO:0043039	tRNA aminoacylation	0.983492	3	vigra.VC1973A.gnm6.ann1.Vradi06g13610/vigra.VC1973A.gnm6.ann1.Vradi05g08580/vigra.VC1973A.gnm6.ann1.Vradi09g03900
Biological process	GO:0000160	phosphorelay signal transduction system	0.984771	4	novel.2034/vigra.VC1973A.gnm6.ann1.Vradi0198s00180/novel.2050/novel.1946
Biological process	GO:0006457	protein folding	0.984868	8	vigra.VC1973A.gnm6.ann1.Vradi07g05440/vigra.VC1973A.gnm6.ann1.Vradi05g21910/vigra.VC1973A.gnm6.ann1.Vradi01g13880/vigra.VC1973A.gnm6.ann1.Vradi05g15430/vigra.VC1973A.gnm6.ann1.Vradi07g18060/novel.3042/vigra.VC1973A.gnm6.ann1.Vradi07g23550/vigra.VC1973A.gnm6.ann1.Vradi06g01480
Biological process	GO:0045017	glycerolipid biosynthetic process	0.98508	1	vigra.VC1973A.gnm6.ann1.Vradi0606s00010
Biological process	GO:0071705	nitrogen compound transport	0.985207	15	vigra.VC1973A.gnm6.ann1.Vradi06g09260/vigra.VC1973A.gnm6.ann1.Vradi0327s00040/vigra.VC1973A.gnm6.ann1.Vradi05g21910/vigra.VC1973A.gnm6.ann1.Vradi0221s00090/vigra.VC1973A.gnm6.ann1.Vradi07g31300/vigra.VC1973A.gnm6.ann1.Vradi06g11590/vigra.VC1973A.gnm6.ann1.Vradi05g08980/vigra.VC1973A.gnm6.ann1.Vradi10g11330/vigra.VC1973A.gnm6.ann1.Vradi07g18340/vigra.VC1973A.gnm6.ann1.Vradi0100s00600/vigra.VC1973A…
Biological process	GO:1901607	alpha-amino acid biosynthetic process	0.985735	2	vigra.VC1973A.gnm6.ann1.Vradi06g01110/vigra.VC1973A.gnm6.ann1.Vradi10g01300
Biological process	GO:0045454	cell redox homeostasis	0.986246	8	vigra.VC1973A.gnm6.ann1.Vradi11g10820/vigra.VC1973A.gnm6.ann1.Vradi06g16340/vigra.VC1973A.gnm6.ann1.Vradi08g10010/vigra.VC1973A.gnm6.ann1.Vradi07g24760/vigra.VC1973A.gnm6.ann1.Vradi05g17210/vigra.VC1973A.gnm6.ann1.Vradi0007s01870/vigra.VC1973A.gnm6.ann1.Vradi0154s00400/vigra.VC1973A.gnm6.ann1.Vradi07g05450
Biological process	GO:0008652	cellular amino acid biosynthetic process	0.987182	3	vigra.VC1973A.gnm6.ann1.Vradi06g01110/vigra.VC1973A.gnm6.ann1.Vradi10g01300/vigra.VC1973A.gnm6.ann1.Vradi01g01400
Biological process	GO:0000413	protein peptidyl-prolyl isomerization	0.98921	1	vigra.VC1973A.gnm6.ann1.Vradi05g15430
Biological process	GO:0018208	peptidyl-proline modification	0.98921	1	vigra.VC1973A.gnm6.ann1.Vradi05g15430
Biological process	GO:0016071	mRNA metabolic process	0.989226	2	vigra.VC1973A.gnm6.ann1.Vradi02g03760/vigra.VC1973A.gnm6.ann1.Vradi02g02240
Biological process	GO:0022607	cellular component assembly	0.990559	6	novel.1981/vigra.VC1973A.gnm6.ann1.Vradi0190s00230/vigra.VC1973A.gnm6.ann1.Vradi07g30680/vigra.VC1973A.gnm6.ann1.Vradi02g13670/vigra.VC1973A.gnm6.ann1.Vradi05g18200/vigra.VC1973A.gnm6.ann1.Vradi0190s00060
Biological process	GO:0019725	cellular homeostasis	0.991548	8	vigra.VC1973A.gnm6.ann1.Vradi11g10820/vigra.VC1973A.gnm6.ann1.Vradi06g16340/vigra.VC1973A.gnm6.ann1.Vradi08g10010/vigra.VC1973A.gnm6.ann1.Vradi07g24760/vigra.VC1973A.gnm6.ann1.Vradi05g17210/vigra.VC1973A.gnm6.ann1.Vradi0007s01870/vigra.VC1973A.gnm6.ann1.Vradi0154s00400/vigra.VC1973A.gnm6.ann1.Vradi07g05450
Biological process	GO:0098655	cation transmembrane transport	0.992538	4	vigra.VC1973A.gnm6.ann1.Vradi01g13100/novel.1477/vigra.VC1973A.gnm6.ann1.Vradi0381s00060/vigra.VC1973A.gnm6.ann1.Vradi07g07110
Biological process	GO:0098660	inorganic ion transmembrane transport	0.992538	4	vigra.VC1973A.gnm6.ann1.Vradi01g13100/novel.1477/vigra.VC1973A.gnm6.ann1.Vradi0381s00060/vigra.VC1973A.gnm6.ann1.Vradi07g07110
Biological process	GO:0098662	inorganic cation transmembrane transport	0.992538	4	vigra.VC1973A.gnm6.ann1.Vradi01g13100/novel.1477/vigra.VC1973A.gnm6.ann1.Vradi0381s00060/vigra.VC1973A.gnm6.ann1.Vradi07g07110
Biological process	GO:0042592	homeostatic process	0.993073	8	vigra.VC1973A.gnm6.ann1.Vradi11g10820/vigra.VC1973A.gnm6.ann1.Vradi06g16340/vigra.VC1973A.gnm6.ann1.Vradi08g10010/vigra.VC1973A.gnm6.ann1.Vradi07g24760/vigra.VC1973A.gnm6.ann1.Vradi05g17210/vigra.VC1973A.gnm6.ann1.Vradi0007s01870/vigra.VC1973A.gnm6.ann1.Vradi0154s00400/vigra.VC1973A.gnm6.ann1.Vradi07g05450
Biological process	GO:0034220	ion transmembrane transport	0.995084	6	vigra.VC1973A.gnm6.ann1.Vradi01g13100/vigra.VC1973A.gnm6.ann1.Vradi0327s00040/novel.1477/vigra.VC1973A.gnm6.ann1.Vradi07g18340/vigra.VC1973A.gnm6.ann1.Vradi0381s00060/vigra.VC1973A.gnm6.ann1.Vradi07g07110
Biological process	GO:0009100	glycoprotein metabolic process	0.995409	2	vigra.VC1973A.gnm6.ann1.Vradi08g16140/vigra.VC1973A.gnm6.ann1.Vradi07g22140
Biological process	GO:0009101	glycoprotein biosynthetic process	0.995409	2	vigra.VC1973A.gnm6.ann1.Vradi08g16140/vigra.VC1973A.gnm6.ann1.Vradi07g22140
Biological process	GO:0016192	vesicle-mediated transport	0.99545	11	vigra.VC1973A.gnm6.ann1.Vradi06g09260/novel.1642/novel.1201/novel.1782/vigra.VC1973A.gnm6.ann1.Vradi04g02380/vigra.VC1973A.gnm6.ann1.Vradi08g04720/vigra.VC1973A.gnm6.ann1.Vradi01g09620/vigra.VC1973A.gnm6.ann1.Vradi08g07950/vigra.VC1973A.gnm6.ann1.Vradi0073s00170/vigra.VC1973A.gnm6.ann1.Vradi01g11590/vigra.VC1973A.gnm6.ann1.Vradi0146s00210
Biological process	GO:0043933	protein-containing complex subunit organization	0.996507	3	vigra.VC1973A.gnm6.ann1.Vradi08g02750/vigra.VC1973A.gnm6.ann1.Vradi07g30680/vigra.VC1973A.gnm6.ann1.Vradi05g18200
Biological process	GO:0015031	protein transport	0.996764	9	vigra.VC1973A.gnm6.ann1.Vradi06g09260/vigra.VC1973A.gnm6.ann1.Vradi05g21910/vigra.VC1973A.gnm6.ann1.Vradi06g11590/vigra.VC1973A.gnm6.ann1.Vradi05g08980/vigra.VC1973A.gnm6.ann1.Vradi10g11330/vigra.VC1973A.gnm6.ann1.Vradi0083s00830/vigra.VC1973A.gnm6.ann1.Vradi07g01710/vigra.VC1973A.gnm6.ann1.Vradi04g11270/vigra.VC1973A.gnm6.ann1.Vradi0073s00170
Biological process	GO:0015833	peptide transport	0.996764	9	vigra.VC1973A.gnm6.ann1.Vradi06g09260/vigra.VC1973A.gnm6.ann1.Vradi05g21910/vigra.VC1973A.gnm6.ann1.Vradi06g11590/vigra.VC1973A.gnm6.ann1.Vradi05g08980/vigra.VC1973A.gnm6.ann1.Vradi10g11330/vigra.VC1973A.gnm6.ann1.Vradi0083s00830/vigra.VC1973A.gnm6.ann1.Vradi07g01710/vigra.VC1973A.gnm6.ann1.Vradi04g11270/vigra.VC1973A.gnm6.ann1.Vradi0073s00170
Biological process	GO:0042886	amide transport	0.996764	9	vigra.VC1973A.gnm6.ann1.Vradi06g09260/vigra.VC1973A.gnm6.ann1.Vradi05g21910/vigra.VC1973A.gnm6.ann1.Vradi06g11590/vigra.VC1973A.gnm6.ann1.Vradi05g08980/vigra.VC1973A.gnm6.ann1.Vradi10g11330/vigra.VC1973A.gnm6.ann1.Vradi0083s00830/vigra.VC1973A.gnm6.ann1.Vradi07g01710/vigra.VC1973A.gnm6.ann1.Vradi04g11270/vigra.VC1973A.gnm6.ann1.Vradi0073s00170
Biological process	GO:0071702	organic substance transport	0.996847	14	vigra.VC1973A.gnm6.ann1.Vradi06g09260/vigra.VC1973A.gnm6.ann1.Vradi0327s00040/vigra.VC1973A.gnm6.ann1.Vradi05g21910/vigra.VC1973A.gnm6.ann1.Vradi06g11590/vigra.VC1973A.gnm6.ann1.Vradi06g09220/vigra.VC1973A.gnm6.ann1.Vradi05g08980/vigra.VC1973A.gnm6.ann1.Vradi10g11330/vigra.VC1973A.gnm6.ann1.Vradi0183s00060/vigra.VC1973A.gnm6.ann1.Vradi07g18340/vigra.VC1973A.gnm6.ann1.Vradi0083s00830/vigra.VC1973A…
Biological process	GO:0006397	mRNA processing	0.997052	1	vigra.VC1973A.gnm6.ann1.Vradi02g02240
Biological process	GO:0051716	cellular response to stimulus	0.997076	37	vigra.VC1973A.gnm6.ann1.Vradi09g06980/novel.2763/vigra.VC1973A.gnm6.ann1.Vradi09g09490/vigra.VC1973A.gnm6.ann1.Vradi01g02470/novel.3119/novel.779/novel.2034/vigra.VC1973A.gnm6.ann1.Vradi07g04750/vigra.VC1973A.gnm6.ann1.Vradi08g02100/novel.2896/vigra.VC1973A.gnm6.ann1.Vradi0198s00180/novel.2654/vigra.VC1973A.gnm6.ann1.Vradi08g22070/novel.3120/vigra.VC1973A.gnm6.ann1.Vradi10g01550/novel.3114/vigra.…
Biological process	GO:0033036	macromolecule localization	0.99716	11	vigra.VC1973A.gnm6.ann1.Vradi06g09260/vigra.VC1973A.gnm6.ann1.Vradi05g21910/vigra.VC1973A.gnm6.ann1.Vradi06g11590/vigra.VC1973A.gnm6.ann1.Vradi06g09220/vigra.VC1973A.gnm6.ann1.Vradi05g08980/vigra.VC1973A.gnm6.ann1.Vradi10g11330/vigra.VC1973A.gnm6.ann1.Vradi0183s00060/vigra.VC1973A.gnm6.ann1.Vradi0083s00830/vigra.VC1973A.gnm6.ann1.Vradi07g01710/vigra.VC1973A.gnm6.ann1.Vradi04g11270/vigra.VC1973A.g…
Biological process	GO:0006996	organelle organization	0.997183	7	vigra.VC1973A.gnm6.ann1.Vradi08g06850/vigra.VC1973A.gnm6.ann1.Vradi10g07360/vigra.VC1973A.gnm6.ann1.Vradi07g22430/vigra.VC1973A.gnm6.ann1.Vradi05g17120/vigra.VC1973A.gnm6.ann1.Vradi02g06260/vigra.VC1973A.gnm6.ann1.Vradi08g15880/vigra.VC1973A.gnm6.ann1.Vradi02g07150
Biological process	GO:0051276	chromosome organization	0.997323	3	vigra.VC1973A.gnm6.ann1.Vradi08g06850/vigra.VC1973A.gnm6.ann1.Vradi05g17120/vigra.VC1973A.gnm6.ann1.Vradi02g07150
Biological process	GO:0065003	protein-containing complex assembly	0.997421	2	vigra.VC1973A.gnm6.ann1.Vradi07g30680/vigra.VC1973A.gnm6.ann1.Vradi05g18200
Biological process	GO:0065008	regulation of biological quality	0.997948	10	vigra.VC1973A.gnm6.ann1.Vradi11g10820/vigra.VC1973A.gnm6.ann1.Vradi06g16340/vigra.VC1973A.gnm6.ann1.Vradi05g13490/vigra.VC1973A.gnm6.ann1.Vradi08g10010/vigra.VC1973A.gnm6.ann1.Vradi07g24760/vigra.VC1973A.gnm6.ann1.Vradi05g17210/vigra.VC1973A.gnm6.ann1.Vradi0007s01870/vigra.VC1973A.gnm6.ann1.Vradi05g02400/vigra.VC1973A.gnm6.ann1.Vradi0154s00400/vigra.VC1973A.gnm6.ann1.Vradi07g05450
Biological process	GO:0045184	establishment of protein localization	0.998055	9	vigra.VC1973A.gnm6.ann1.Vradi06g09260/vigra.VC1973A.gnm6.ann1.Vradi05g21910/vigra.VC1973A.gnm6.ann1.Vradi06g11590/vigra.VC1973A.gnm6.ann1.Vradi05g08980/vigra.VC1973A.gnm6.ann1.Vradi10g11330/vigra.VC1973A.gnm6.ann1.Vradi0083s00830/vigra.VC1973A.gnm6.ann1.Vradi07g01710/vigra.VC1973A.gnm6.ann1.Vradi04g11270/vigra.VC1973A.gnm6.ann1.Vradi0073s00170
Biological process	GO:0044085	cellular component biogenesis	0.998575	9	novel.1981/novel.2796/vigra.VC1973A.gnm6.ann1.Vradi0190s00230/vigra.VC1973A.gnm6.ann1.Vradi06g04650/vigra.VC1973A.gnm6.ann1.Vradi07g30680/vigra.VC1973A.gnm6.ann1.Vradi02g13670/vigra.VC1973A.gnm6.ann1.Vradi05g18200/vigra.VC1973A.gnm6.ann1.Vradi0190s00060/vigra.VC1973A.gnm6.ann1.Vradi06g12360
Biological process	GO:0006508	proteolysis	0.998661	32	vigra.VC1973A.gnm6.ann1.Vradi0500s00020/vigra.VC1973A.gnm6.ann1.Vradi0416s00010/vigra.VC1973A.gnm6.ann1.Vradi0320s00040/novel.701/vigra.VC1973A.gnm6.ann1.Vradi08g07280/vigra.VC1973A.gnm6.ann1.Vradi07g23410/novel.2463/novel.858/vigra.VC1973A.gnm6.ann1.Vradi0149s00250/vigra.VC1973A.gnm6.ann1.Vradi1253s00010/vigra.VC1973A.gnm6.ann1.Vradi0436s00030/vigra.VC1973A.gnm6.ann1.Vradi08g19310/vigra.VC1973A.…
Biological process	GO:0006886	intracellular protein transport	0.998685	5	vigra.VC1973A.gnm6.ann1.Vradi06g09260/vigra.VC1973A.gnm6.ann1.Vradi06g11590/vigra.VC1973A.gnm6.ann1.Vradi05g08980/vigra.VC1973A.gnm6.ann1.Vradi0083s00830/vigra.VC1973A.gnm6.ann1.Vradi0073s00170
Biological process	GO:1901605	alpha-amino acid metabolic process	0.998755	2	vigra.VC1973A.gnm6.ann1.Vradi06g01110/vigra.VC1973A.gnm6.ann1.Vradi10g01300
Biological process	GO:0008104	protein localization	0.998845	9	vigra.VC1973A.gnm6.ann1.Vradi06g09260/vigra.VC1973A.gnm6.ann1.Vradi05g21910/vigra.VC1973A.gnm6.ann1.Vradi06g11590/vigra.VC1973A.gnm6.ann1.Vradi05g08980/vigra.VC1973A.gnm6.ann1.Vradi10g11330/vigra.VC1973A.gnm6.ann1.Vradi0083s00830/vigra.VC1973A.gnm6.ann1.Vradi07g01710/vigra.VC1973A.gnm6.ann1.Vradi04g11270/vigra.VC1973A.gnm6.ann1.Vradi0073s00170
Biological process	GO:0006486	protein glycosylation	0.999054	1	vigra.VC1973A.gnm6.ann1.Vradi07g22140
Biological process	GO:0043413	macromolecule glycosylation	0.999054	1	vigra.VC1973A.gnm6.ann1.Vradi07g22140
Biological process	GO:0006511	ubiquitin-dependent protein catabolic process	0.999419	1	vigra.VC1973A.gnm6.ann1.Vradi01g14140
Biological process	GO:0019941	modification-dependent protein catabolic process	0.999419	1	vigra.VC1973A.gnm6.ann1.Vradi01g14140
Biological process	GO:0043632	modification-dependent macromolecule catabolic process	0.999419	1	vigra.VC1973A.gnm6.ann1.Vradi01g14140
Biological process	GO:0006520	cellular amino acid metabolic process	0.999515	8	vigra.VC1973A.gnm6.ann1.Vradi06g01110/novel.2603/vigra.VC1973A.gnm6.ann1.Vradi06g13610/vigra.VC1973A.gnm6.ann1.Vradi08g13530/vigra.VC1973A.gnm6.ann1.Vradi10g01300/vigra.VC1973A.gnm6.ann1.Vradi05g08580/vigra.VC1973A.gnm6.ann1.Vradi09g03900/vigra.VC1973A.gnm6.ann1.Vradi01g01400
Biological process	GO:0018193	peptidyl-amino acid modification	0.99958	1	vigra.VC1973A.gnm6.ann1.Vradi05g15430
Biological process	GO:0070085	glycosylation	0.99958	1	vigra.VC1973A.gnm6.ann1.Vradi07g22140
Biological process	GO:0034613	cellular protein localization	0.999618	5	vigra.VC1973A.gnm6.ann1.Vradi06g09260/vigra.VC1973A.gnm6.ann1.Vradi06g11590/vigra.VC1973A.gnm6.ann1.Vradi05g08980/vigra.VC1973A.gnm6.ann1.Vradi0083s00830/vigra.VC1973A.gnm6.ann1.Vradi0073s00170
Biological process	GO:0070727	cellular macromolecule localization	0.999618	5	vigra.VC1973A.gnm6.ann1.Vradi06g09260/vigra.VC1973A.gnm6.ann1.Vradi06g11590/vigra.VC1973A.gnm6.ann1.Vradi05g08980/vigra.VC1973A.gnm6.ann1.Vradi0083s00830/vigra.VC1973A.gnm6.ann1.Vradi0073s00170
Biological process	GO:0046907	intracellular transport	0.999663	5	vigra.VC1973A.gnm6.ann1.Vradi06g09260/vigra.VC1973A.gnm6.ann1.Vradi06g11590/vigra.VC1973A.gnm6.ann1.Vradi05g08980/vigra.VC1973A.gnm6.ann1.Vradi0083s00830/vigra.VC1973A.gnm6.ann1.Vradi0073s00170
Biological process	GO:0051649	establishment of localization in cell	0.999663	5	vigra.VC1973A.gnm6.ann1.Vradi06g09260/vigra.VC1973A.gnm6.ann1.Vradi06g11590/vigra.VC1973A.gnm6.ann1.Vradi05g08980/vigra.VC1973A.gnm6.ann1.Vradi0083s00830/vigra.VC1973A.gnm6.ann1.Vradi0073s00170
Biological process	GO:0009057	macromolecule catabolic process	0.999703	5	vigra.VC1973A.gnm6.ann1.Vradi05g15830/vigra.VC1973A.gnm6.ann1.Vradi02g03760/vigra.VC1973A.gnm6.ann1.Vradi0656s00030/vigra.VC1973A.gnm6.ann1.Vradi07g12000/vigra.VC1973A.gnm6.ann1.Vradi01g14140
Biological process	GO:0034470	ncRNA processing	0.999716	2	novel.2796/vigra.VC1973A.gnm6.ann1.Vradi06g12360
Biological process	GO:0006281	DNA repair	0.999755	2	vigra.VC1973A.gnm6.ann1.Vradi0129s00030/vigra.VC1973A.gnm6.ann1.Vradi05g18610
Biological process	GO:0006974	cellular response to DNA damage stimulus	0.999818	2	vigra.VC1973A.gnm6.ann1.Vradi0129s00030/vigra.VC1973A.gnm6.ann1.Vradi05g18610
Biological process	GO:0033554	cellular response to stress	0.999818	2	vigra.VC1973A.gnm6.ann1.Vradi0129s00030/vigra.VC1973A.gnm6.ann1.Vradi05g18610
Biological process	GO:0044265	cellular macromolecule catabolic process	0.9999	2	vigra.VC1973A.gnm6.ann1.Vradi02g03760/vigra.VC1973A.gnm6.ann1.Vradi01g14140
Biological process	GO:0006399	tRNA metabolic process	0.999902	3	vigra.VC1973A.gnm6.ann1.Vradi06g13610/vigra.VC1973A.gnm6.ann1.Vradi05g08580/vigra.VC1973A.gnm6.ann1.Vradi09g03900
Biological process	GO:0034660	ncRNA metabolic process	0.999928	5	novel.2796/vigra.VC1973A.gnm6.ann1.Vradi06g13610/vigra.VC1973A.gnm6.ann1.Vradi05g08580/vigra.VC1973A.gnm6.ann1.Vradi09g03900/vigra.VC1973A.gnm6.ann1.Vradi06g12360
Biological process	GO:1901565	organonitrogen compound catabolic process	0.999945	3	vigra.VC1973A.gnm6.ann1.Vradi05g15830/vigra.VC1973A.gnm6.ann1.Vradi0656s00030/vigra.VC1973A.gnm6.ann1.Vradi01g14140
Biological process	GO:0044257	cellular protein catabolic process	0.999949	1	vigra.VC1973A.gnm6.ann1.Vradi01g14140
Biological process	GO:0051603	proteolysis involved in cellular protein catabolic process	0.999949	1	vigra.VC1973A.gnm6.ann1.Vradi01g14140
Biological process	GO:0030163	protein catabolic process	0.999969	1	vigra.VC1973A.gnm6.ann1.Vradi01g14140
Biological process	GO:0051641	cellular localization	0.999983	5	vigra.VC1973A.gnm6.ann1.Vradi06g09260/vigra.VC1973A.gnm6.ann1.Vradi06g11590/vigra.VC1973A.gnm6.ann1.Vradi05g08980/vigra.VC1973A.gnm6.ann1.Vradi0083s00830/vigra.VC1973A.gnm6.ann1.Vradi0073s00170
Biological process	GO:0006396	RNA processing	1	4	novel.2796/novel.3462/vigra.VC1973A.gnm6.ann1.Vradi06g12360/vigra.VC1973A.gnm6.ann1.Vradi02g02240
Biological process	GO:0006412	translation	1	14	novel.1541/vigra.VC1973A.gnm6.ann1.Vradi08g02750/novel.2647/novel.1371/novel.2248/vigra.VC1973A.gnm6.ann1.Vradi06g13610/vigra.VC1973A.gnm6.ann1.Vradi02g09360/vigra.VC1973A.gnm6.ann1.Vradi01g11620/vigra.VC1973A.gnm6.ann1.Vradi04g02300/novel.1303/vigra.VC1973A.gnm6.ann1.Vradi05g08580/vigra.VC1973A.gnm6.ann1.Vradi09g03900/novel.2536/novel.1690
Biological process	GO:0006518	peptide metabolic process	1	15	novel.1541/vigra.VC1973A.gnm6.ann1.Vradi08g02750/vigra.VC1973A.gnm6.ann1.Vradi0544s00020/novel.2647/novel.1371/novel.2248/vigra.VC1973A.gnm6.ann1.Vradi06g13610/vigra.VC1973A.gnm6.ann1.Vradi02g09360/vigra.VC1973A.gnm6.ann1.Vradi01g11620/vigra.VC1973A.gnm6.ann1.Vradi04g02300/novel.1303/vigra.VC1973A.gnm6.ann1.Vradi05g08580/vigra.VC1973A.gnm6.ann1.Vradi09g03900/novel.2536/novel.1690
Biological process	GO:0043043	peptide biosynthetic process	1	14	novel.1541/vigra.VC1973A.gnm6.ann1.Vradi08g02750/novel.2647/novel.1371/novel.2248/vigra.VC1973A.gnm6.ann1.Vradi06g13610/vigra.VC1973A.gnm6.ann1.Vradi02g09360/vigra.VC1973A.gnm6.ann1.Vradi01g11620/vigra.VC1973A.gnm6.ann1.Vradi04g02300/novel.1303/vigra.VC1973A.gnm6.ann1.Vradi05g08580/vigra.VC1973A.gnm6.ann1.Vradi09g03900/novel.2536/novel.1690
Biological process	GO:0043604	amide biosynthetic process	1	14	novel.1541/vigra.VC1973A.gnm6.ann1.Vradi08g02750/novel.2647/novel.1371/novel.2248/vigra.VC1973A.gnm6.ann1.Vradi06g13610/vigra.VC1973A.gnm6.ann1.Vradi02g09360/vigra.VC1973A.gnm6.ann1.Vradi01g11620/vigra.VC1973A.gnm6.ann1.Vradi04g02300/novel.1303/vigra.VC1973A.gnm6.ann1.Vradi05g08580/vigra.VC1973A.gnm6.ann1.Vradi09g03900/novel.2536/novel.1690
Biological process	GO:0043603	cellular amide metabolic process	1	15	novel.1541/vigra.VC1973A.gnm6.ann1.Vradi08g02750/vigra.VC1973A.gnm6.ann1.Vradi0544s00020/novel.2647/novel.1371/novel.2248/vigra.VC1973A.gnm6.ann1.Vradi06g13610/vigra.VC1973A.gnm6.ann1.Vradi02g09360/vigra.VC1973A.gnm6.ann1.Vradi01g11620/vigra.VC1973A.gnm6.ann1.Vradi04g02300/novel.1303/vigra.VC1973A.gnm6.ann1.Vradi05g08580/vigra.VC1973A.gnm6.ann1.Vradi09g03900/novel.2536/novel.1690
Cellular component	GO:0005618	cell wall	0.000971926	19	vigra.VC1973A.gnm6.ann1.Vradi07g27870/vigra.VC1973A.gnm6.ann1.Vradi04g04000/vigra.VC1973A.gnm6.ann1.Vradi09g09290/vigra.VC1973A.gnm6.ann1.Vradi07g28720/vigra.VC1973A.gnm6.ann1.Vradi05g21610/vigra.VC1973A.gnm6.ann1.Vradi11g00490/vigra.VC1973A.gnm6.ann1.Vradi09g09280/vigra.VC1973A.gnm6.ann1.Vradi07g22530/vigra.VC1973A.gnm6.ann1.Vradi02g06230/vigra.VC1973A.gnm6.ann1.Vradi0289s00030/vigra.VC1973A.gnm…
Cellular component	GO:0030312	external encapsulating structure	0.000971926	19	vigra.VC1973A.gnm6.ann1.Vradi07g27870/vigra.VC1973A.gnm6.ann1.Vradi04g04000/vigra.VC1973A.gnm6.ann1.Vradi09g09290/vigra.VC1973A.gnm6.ann1.Vradi07g28720/vigra.VC1973A.gnm6.ann1.Vradi05g21610/vigra.VC1973A.gnm6.ann1.Vradi11g00490/vigra.VC1973A.gnm6.ann1.Vradi09g09280/vigra.VC1973A.gnm6.ann1.Vradi07g22530/vigra.VC1973A.gnm6.ann1.Vradi02g06230/vigra.VC1973A.gnm6.ann1.Vradi0289s00030/vigra.VC1973A.gnm…
Cellular component	GO:0071944	cell periphery	0.00857592	25	vigra.VC1973A.gnm6.ann1.Vradi07g27870/novel.1642/vigra.VC1973A.gnm6.ann1.Vradi04g04000/vigra.VC1973A.gnm6.ann1.Vradi09g09290/vigra.VC1973A.gnm6.ann1.Vradi07g28720/novel.1782/vigra.VC1973A.gnm6.ann1.Vradi04g02380/vigra.VC1973A.gnm6.ann1.Vradi05g21610/vigra.VC1973A.gnm6.ann1.Vradi11g00490/vigra.VC1973A.gnm6.ann1.Vradi09g09280/vigra.VC1973A.gnm6.ann1.Vradi08g04720/vigra.VC1973A.gnm6.ann1.Vradi07g225…
Cellular component	GO:0005576	extracellular region	0.014368	11	vigra.VC1973A.gnm6.ann1.Vradi0500s00020/vigra.VC1973A.gnm6.ann1.Vradi0320s00040/vigra.VC1973A.gnm6.ann1.Vradi04g04000/vigra.VC1973A.gnm6.ann1.Vradi0149s00250/vigra.VC1973A.gnm6.ann1.Vradi0436s00030/vigra.VC1973A.gnm6.ann1.Vradi02g06230/vigra.VC1973A.gnm6.ann1.Vradi0450s00100/vigra.VC1973A.gnm6.ann1.Vradi0073s00060/vigra.VC1973A.gnm6.ann1.Vradi05g22880/novel.238/novel.1710
Cellular component	GO:0031012	extracellular matrix	0.0423858	4	vigra.VC1973A.gnm6.ann1.Vradi0500s00020/vigra.VC1973A.gnm6.ann1.Vradi0320s00040/vigra.VC1973A.gnm6.ann1.Vradi0149s00250/vigra.VC1973A.gnm6.ann1.Vradi0436s00030
Cellular component	GO:0044421	extracellular region part	0.0423858	4	vigra.VC1973A.gnm6.ann1.Vradi0500s00020/vigra.VC1973A.gnm6.ann1.Vradi0320s00040/vigra.VC1973A.gnm6.ann1.Vradi0149s00250/vigra.VC1973A.gnm6.ann1.Vradi0436s00030
Cellular component	GO:0098687	chromosomal region	0.101962	3	novel.1963/vigra.VC1973A.gnm6.ann1.Vradi02g06260/vigra.VC1973A.gnm6.ann1.Vradi08g15880
Cellular component	GO:0048046	apoplast	0.114297	6	vigra.VC1973A.gnm6.ann1.Vradi04g04000/vigra.VC1973A.gnm6.ann1.Vradi02g06230/vigra.VC1973A.gnm6.ann1.Vradi0450s00100/vigra.VC1973A.gnm6.ann1.Vradi0073s00060/vigra.VC1973A.gnm6.ann1.Vradi05g22880/novel.238
Cellular component	GO:0000145	exocyst	0.163016	6	novel.1642/novel.1782/vigra.VC1973A.gnm6.ann1.Vradi04g02380/vigra.VC1973A.gnm6.ann1.Vradi08g04720/vigra.VC1973A.gnm6.ann1.Vradi08g07950/vigra.VC1973A.gnm6.ann1.Vradi0146s00210
Cellular component	GO:0005938	cell cortex	0.163016	6	novel.1642/novel.1782/vigra.VC1973A.gnm6.ann1.Vradi04g02380/vigra.VC1973A.gnm6.ann1.Vradi08g04720/vigra.VC1973A.gnm6.ann1.Vradi08g07950/vigra.VC1973A.gnm6.ann1.Vradi0146s00210
Cellular component	GO:0044448	cell cortex part	0.163016	6	novel.1642/novel.1782/vigra.VC1973A.gnm6.ann1.Vradi04g02380/vigra.VC1973A.gnm6.ann1.Vradi08g04720/vigra.VC1973A.gnm6.ann1.Vradi08g07950/vigra.VC1973A.gnm6.ann1.Vradi0146s00210
Cellular component	GO:0099568	cytoplasmic region	0.163016	6	novel.1642/novel.1782/vigra.VC1973A.gnm6.ann1.Vradi04g02380/vigra.VC1973A.gnm6.ann1.Vradi08g04720/vigra.VC1973A.gnm6.ann1.Vradi08g07950/vigra.VC1973A.gnm6.ann1.Vradi0146s00210
Cellular component	GO:0009654	photosystem II oxygen evolving complex	0.199013	4	vigra.VC1973A.gnm6.ann1.Vradi09g05500/vigra.VC1973A.gnm6.ann1.Vradi0189s00020/vigra.VC1973A.gnm6.ann1.Vradi0184s00050/vigra.VC1973A.gnm6.ann1.Vradi08g18590
Cellular component	GO:0019898	extrinsic component of membrane	0.199013	4	vigra.VC1973A.gnm6.ann1.Vradi09g05500/vigra.VC1973A.gnm6.ann1.Vradi0189s00020/vigra.VC1973A.gnm6.ann1.Vradi0184s00050/vigra.VC1973A.gnm6.ann1.Vradi08g18590
Cellular component	GO:0009521	photosystem	0.199664	6	vigra.VC1973A.gnm6.ann1.Vradi09g05500/vigra.VC1973A.gnm6.ann1.Vradi0189s00020/vigra.VC1973A.gnm6.ann1.Vradi08g08520/vigra.VC1973A.gnm6.ann1.Vradi0184s00050/vigra.VC1973A.gnm6.ann1.Vradi0315s00210/vigra.VC1973A.gnm6.ann1.Vradi08g18590
Cellular component	GO:0099023	tethering complex	0.199664	6	novel.1642/novel.1782/vigra.VC1973A.gnm6.ann1.Vradi04g02380/vigra.VC1973A.gnm6.ann1.Vradi08g04720/vigra.VC1973A.gnm6.ann1.Vradi08g07950/vigra.VC1973A.gnm6.ann1.Vradi0146s00210
Cellular component	GO:0034357	photosynthetic membrane	0.219039	6	vigra.VC1973A.gnm6.ann1.Vradi09g05500/vigra.VC1973A.gnm6.ann1.Vradi0189s00020/vigra.VC1973A.gnm6.ann1.Vradi08g08520/vigra.VC1973A.gnm6.ann1.Vradi0184s00050/vigra.VC1973A.gnm6.ann1.Vradi0315s00210/vigra.VC1973A.gnm6.ann1.Vradi08g18590
Cellular component	GO:0031225	anchored component of membrane	0.219542	3	vigra.VC1973A.gnm6.ann1.Vradi0190s00230/vigra.VC1973A.gnm6.ann1.Vradi02g13670/vigra.VC1973A.gnm6.ann1.Vradi0190s00060
Cellular component	GO:0042651	thylakoid membrane	0.224806	4	vigra.VC1973A.gnm6.ann1.Vradi09g05500/vigra.VC1973A.gnm6.ann1.Vradi0189s00020/vigra.VC1973A.gnm6.ann1.Vradi0184s00050/vigra.VC1973A.gnm6.ann1.Vradi08g18590
Cellular component	GO:0009579	thylakoid	0.259518	6	vigra.VC1973A.gnm6.ann1.Vradi09g05500/vigra.VC1973A.gnm6.ann1.Vradi0189s00020/vigra.VC1973A.gnm6.ann1.Vradi08g08520/vigra.VC1973A.gnm6.ann1.Vradi0184s00050/vigra.VC1973A.gnm6.ann1.Vradi0315s00210/vigra.VC1973A.gnm6.ann1.Vradi08g18590
Cellular component	GO:0044436	thylakoid part	0.259518	6	vigra.VC1973A.gnm6.ann1.Vradi09g05500/vigra.VC1973A.gnm6.ann1.Vradi0189s00020/vigra.VC1973A.gnm6.ann1.Vradi08g08520/vigra.VC1973A.gnm6.ann1.Vradi0184s00050/vigra.VC1973A.gnm6.ann1.Vradi0315s00210/vigra.VC1973A.gnm6.ann1.Vradi08g18590
Cellular component	GO:1990204	oxidoreductase complex	0.278598	4	vigra.VC1973A.gnm6.ann1.Vradi09g05500/vigra.VC1973A.gnm6.ann1.Vradi0189s00020/vigra.VC1973A.gnm6.ann1.Vradi0184s00050/vigra.VC1973A.gnm6.ann1.Vradi08g18590
Cellular component	GO:0009523	photosystem II	0.334147	4	vigra.VC1973A.gnm6.ann1.Vradi09g05500/vigra.VC1973A.gnm6.ann1.Vradi0189s00020/vigra.VC1973A.gnm6.ann1.Vradi0184s00050/vigra.VC1973A.gnm6.ann1.Vradi08g18590
Cellular component	GO:0005777	peroxisome	0.374703	2	vigra.VC1973A.gnm6.ann1.Vradi0149s00060/vigra.VC1973A.gnm6.ann1.Vradi07g19010
Cellular component	GO:0042579	microbody	0.374703	2	vigra.VC1973A.gnm6.ann1.Vradi0149s00060/vigra.VC1973A.gnm6.ann1.Vradi07g19010
Cellular component	GO:0044427	chromosomal part	0.390344	5	novel.1118/novel.1963/vigra.VC1973A.gnm6.ann1.Vradi02g06260/vigra.VC1973A.gnm6.ann1.Vradi08g15880/vigra.VC1973A.gnm6.ann1.Vradi02g07150
Cellular component	GO:0045259	proton-transporting ATP synthase complex	0.418187	2	vigra.VC1973A.gnm6.ann1.Vradi01g13100/vigra.VC1973A.gnm6.ann1.Vradi0381s00060
Cellular component	GO:0033178	proton-transporting two-sector ATPase complex, catalytic domain	0.574389	2	vigra.VC1973A.gnm6.ann1.Vradi01g13100/vigra.VC1973A.gnm6.ann1.Vradi0381s00060
Cellular component	GO:0044815	DNA packaging complex	0.574389	2	novel.1118/vigra.VC1973A.gnm6.ann1.Vradi02g07150
Cellular component	GO:0005694	chromosome	0.579745	6	vigra.VC1973A.gnm6.ann1.Vradi08g06850/novel.1118/novel.1963/vigra.VC1973A.gnm6.ann1.Vradi02g06260/vigra.VC1973A.gnm6.ann1.Vradi08g15880/vigra.VC1973A.gnm6.ann1.Vradi02g07150
Cellular component	GO:0016469	proton-transporting two-sector ATPase complex	0.621988	4	vigra.VC1973A.gnm6.ann1.Vradi01g13100/novel.1477/vigra.VC1973A.gnm6.ann1.Vradi0381s00060/vigra.VC1973A.gnm6.ann1.Vradi07g07110
Cellular component	GO:0033177	proton-transporting two-sector ATPase complex, proton-transporting domain	0.697859	2	novel.1477/vigra.VC1973A.gnm6.ann1.Vradi07g07110
Cellular component	GO:0000159	protein phosphatase type 2A complex	0.712378	1	vigra.VC1973A.gnm6.ann1.Vradi08g22070
Cellular component	GO:0008287	protein serine/threonine phosphatase complex	0.712378	1	vigra.VC1973A.gnm6.ann1.Vradi08g22070
Cellular component	GO:0030118	clathrin coat	0.712378	1	vigra.VC1973A.gnm6.ann1.Vradi0073s00170
Cellular component	GO:0033176	proton-transporting V-type ATPase complex	0.712378	1	vigra.VC1973A.gnm6.ann1.Vradi07g07110
Cellular component	GO:1903293	phosphatase complex	0.712378	1	vigra.VC1973A.gnm6.ann1.Vradi08g22070
Cellular component	GO:0005875	microtubule associated complex	0.746146	1	vigra.VC1973A.gnm6.ann1.Vradi0321s00060
Cellular component	GO:0000786	nucleosome	0.825522	1	novel.1118
Cellular component	GO:0000785	chromatin	0.846037	1	novel.1118
Cellular component	GO:0032993	protein-DNA complex	0.846037	1	novel.1118
Cellular component	GO:0015630	microtubule cytoskeleton	0.864147	1	vigra.VC1973A.gnm6.ann1.Vradi0321s00060
Cellular component	GO:0005634	nucleus	0.909178	46	novel.44/vigra.VC1973A.gnm6.ann1.Vradi07g16480/vigra.VC1973A.gnm6.ann1.Vradi03g01100/vigra.VC1973A.gnm6.ann1.Vradi0359s00040/vigra.VC1973A.gnm6.ann1.Vradi0222s00050/vigra.VC1973A.gnm6.ann1.Vradi08g01990/vigra.VC1973A.gnm6.ann1.Vradi08g09150/vigra.VC1973A.gnm6.ann1.Vradi03g01240/novel.3462/vigra.VC1973A.gnm6.ann1.Vradi09g05540/vigra.VC1973A.gnm6.ann1.Vradi10g00620/vigra.VC1973A.gnm6.ann1.Vradi0007…
Cellular component	GO:0098796	membrane protein complex	0.950133	11	vigra.VC1973A.gnm6.ann1.Vradi01g13100/novel.1477/vigra.VC1973A.gnm6.ann1.Vradi09g05500/vigra.VC1973A.gnm6.ann1.Vradi0189s00020/vigra.VC1973A.gnm6.ann1.Vradi0381s00060/vigra.VC1973A.gnm6.ann1.Vradi08g08520/vigra.VC1973A.gnm6.ann1.Vradi0184s00050/vigra.VC1973A.gnm6.ann1.Vradi0073s00170/vigra.VC1973A.gnm6.ann1.Vradi0315s00210/vigra.VC1973A.gnm6.ann1.Vradi08g18590/vigra.VC1973A.gnm6.ann1.Vradi07g07110
Cellular component	GO:0005783	endoplasmic reticulum	0.953171	3	vigra.VC1973A.gnm6.ann1.Vradi0606s00010/vigra.VC1973A.gnm6.ann1.Vradi05g03600/novel.3042
Cellular component	GO:0005789	endoplasmic reticulum membrane	0.976563	1	vigra.VC1973A.gnm6.ann1.Vradi0606s00010
Cellular component	GO:0030117	membrane coat	0.976563	1	vigra.VC1973A.gnm6.ann1.Vradi0073s00170
Cellular component	GO:0042175	nuclear outer membrane-endoplasmic reticulum membrane network	0.976563	1	vigra.VC1973A.gnm6.ann1.Vradi0606s00010
Cellular component	GO:0044432	endoplasmic reticulum part	0.976563	1	vigra.VC1973A.gnm6.ann1.Vradi0606s00010
Cellular component	GO:0048475	coated membrane	0.976563	1	vigra.VC1973A.gnm6.ann1.Vradi0073s00170
Cellular component	GO:0098827	endoplasmic reticulum subcompartment	0.976563	1	vigra.VC1973A.gnm6.ann1.Vradi0606s00010
Cellular component	GO:0044430	cytoskeletal part	0.988997	1	vigra.VC1973A.gnm6.ann1.Vradi0321s00060
Cellular component	GO:0031984	organelle subcompartment	0.990302	1	vigra.VC1973A.gnm6.ann1.Vradi0606s00010
Cellular component	GO:0005856	cytoskeleton	0.991452	1	vigra.VC1973A.gnm6.ann1.Vradi0321s00060
Cellular component	GO:1902494	catalytic complex	0.993587	8	novel.2058/vigra.VC1973A.gnm6.ann1.Vradi08g22070/vigra.VC1973A.gnm6.ann1.Vradi01g06780/novel.3462/vigra.VC1973A.gnm6.ann1.Vradi09g05500/vigra.VC1973A.gnm6.ann1.Vradi0189s00020/vigra.VC1973A.gnm6.ann1.Vradi0184s00050/vigra.VC1973A.gnm6.ann1.Vradi08g18590
Cellular component	GO:0031981	nuclear lumen	0.998874	1	novel.3462
Cellular component	GO:0012505	endomembrane system	0.999196	3	vigra.VC1973A.gnm6.ann1.Vradi0606s00010/vigra.VC1973A.gnm6.ann1.Vradi05g03600/novel.3042
Cellular component	GO:0044428	nuclear part	0.999454	2	novel.3462/vigra.VC1973A.gnm6.ann1.Vradi02g02240
Cellular component	GO:0031974	membrane-enclosed lumen	0.999685	1	novel.3462
Cellular component	GO:0043233	organelle lumen	0.999685	1	novel.3462
Cellular component	GO:0070013	intracellular organelle lumen	0.999685	1	novel.3462
Cellular component	GO:0005739	mitochondrion	0.999723	1	vigra.VC1973A.gnm6.ann1.Vradi11g03470
Cellular component	GO:0043228	non-membrane-bounded organelle	0.999998	15	vigra.VC1973A.gnm6.ann1.Vradi08g06850/novel.1541/novel.2647/novel.1118/novel.2248/vigra.VC1973A.gnm6.ann1.Vradi04g02300/novel.1303/novel.2536/novel.1963/vigra.VC1973A.gnm6.ann1.Vradi07g18080/vigra.VC1973A.gnm6.ann1.Vradi02g06260/vigra.VC1973A.gnm6.ann1.Vradi08g15880/vigra.VC1973A.gnm6.ann1.Vradi02g07150/novel.1690/vigra.VC1973A.gnm6.ann1.Vradi0321s00060
Cellular component	GO:0043232	intracellular non-membrane-bounded organelle	0.999998	15	vigra.VC1973A.gnm6.ann1.Vradi08g06850/novel.1541/novel.2647/novel.1118/novel.2248/vigra.VC1973A.gnm6.ann1.Vradi04g02300/novel.1303/novel.2536/novel.1963/vigra.VC1973A.gnm6.ann1.Vradi07g18080/vigra.VC1973A.gnm6.ann1.Vradi02g06260/vigra.VC1973A.gnm6.ann1.Vradi08g15880/vigra.VC1973A.gnm6.ann1.Vradi02g07150/novel.1690/vigra.VC1973A.gnm6.ann1.Vradi0321s00060
Cellular component	GO:0044422	organelle part	0.999999	9	vigra.VC1973A.gnm6.ann1.Vradi0606s00010/novel.3462/novel.1118/novel.1963/vigra.VC1973A.gnm6.ann1.Vradi02g06260/vigra.VC1973A.gnm6.ann1.Vradi08g15880/vigra.VC1973A.gnm6.ann1.Vradi02g02240/vigra.VC1973A.gnm6.ann1.Vradi02g07150/vigra.VC1973A.gnm6.ann1.Vradi0321s00060
Cellular component	GO:0044446	intracellular organelle part	0.999999	9	vigra.VC1973A.gnm6.ann1.Vradi0606s00010/novel.3462/novel.1118/novel.1963/vigra.VC1973A.gnm6.ann1.Vradi02g06260/vigra.VC1973A.gnm6.ann1.Vradi08g15880/vigra.VC1973A.gnm6.ann1.Vradi02g02240/vigra.VC1973A.gnm6.ann1.Vradi02g07150/vigra.VC1973A.gnm6.ann1.Vradi0321s00060
Cellular component	GO:0005840	ribosome	0.999999	7	novel.1541/novel.2647/novel.2248/vigra.VC1973A.gnm6.ann1.Vradi04g02300/novel.1303/novel.2536/novel.1690
Cellular component	GO:1990904	ribonucleoprotein complex	1	8	novel.1541/novel.2647/novel.2248/vigra.VC1973A.gnm6.ann1.Vradi04g02300/novel.1303/novel.2536/vigra.VC1973A.gnm6.ann1.Vradi02g02240/novel.1690
Cellular component	GO:0044444	cytoplasmic part	1	22	novel.1541/novel.2058/novel.1642/vigra.VC1973A.gnm6.ann1.Vradi11g03470/novel.2647/novel.1782/vigra.VC1973A.gnm6.ann1.Vradi04g02380/vigra.VC1973A.gnm6.ann1.Vradi0606s00010/vigra.VC1973A.gnm6.ann1.Vradi01g06780/vigra.VC1973A.gnm6.ann1.Vradi0149s00060/novel.2248/vigra.VC1973A.gnm6.ann1.Vradi05g03600/vigra.VC1973A.gnm6.ann1.Vradi08g04720/vigra.VC1973A.gnm6.ann1.Vradi04g02300/novel.1303/novel.2536/vig…
Molecular function	GO:0008017	microtubule binding	2.62034e-09	31	vigra.VC1973A.gnm6.ann1.Vradi10g07360/vigra.VC1973A.gnm6.ann1.Vradi07g23700/vigra.VC1973A.gnm6.ann1.Vradi08g12550/vigra.VC1973A.gnm6.ann1.Vradi07g01040/vigra.VC1973A.gnm6.ann1.Vradi07g03300/vigra.VC1973A.gnm6.ann1.Vradi07g30590/vigra.VC1973A.gnm6.ann1.Vradi05g13960/vigra.VC1973A.gnm6.ann1.Vradi08g08090/vigra.VC1973A.gnm6.ann1.Vradi08g10470/vigra.VC1973A.gnm6.ann1.Vradi06g01260/vigra.VC1973A.gnm6.…
Molecular function	GO:0015631	tubulin binding	5.55202e-09	31	vigra.VC1973A.gnm6.ann1.Vradi10g07360/vigra.VC1973A.gnm6.ann1.Vradi07g23700/vigra.VC1973A.gnm6.ann1.Vradi08g12550/vigra.VC1973A.gnm6.ann1.Vradi07g01040/vigra.VC1973A.gnm6.ann1.Vradi07g03300/vigra.VC1973A.gnm6.ann1.Vradi07g30590/vigra.VC1973A.gnm6.ann1.Vradi05g13960/vigra.VC1973A.gnm6.ann1.Vradi08g08090/vigra.VC1973A.gnm6.ann1.Vradi08g10470/vigra.VC1973A.gnm6.ann1.Vradi06g01260/vigra.VC1973A.gnm6.…
Molecular function	GO:0004553	hydrolase activity, hydrolyzing O-glycosyl compounds	2.87333e-08	80	vigra.VC1973A.gnm6.ann1.Vradi0635s00020/novel.1214/vigra.VC1973A.gnm6.ann1.Vradi10g06200/vigra.VC1973A.gnm6.ann1.Vradi07g30810/vigra.VC1973A.gnm6.ann1.Vradi11g10440/vigra.VC1973A.gnm6.ann1.Vradi03g08610/vigra.VC1973A.gnm6.ann1.Vradi0206s00080/vigra.VC1973A.gnm6.ann1.Vradi05g15830/vigra.VC1973A.gnm6.ann1.Vradi07g09670/vigra.VC1973A.gnm6.ann1.Vradi10g08240/vigra.VC1973A.gnm6.ann1.Vradi05g18560/vigr…
Molecular function	GO:0003777	microtubule motor activity	3.76885e-08	27	vigra.VC1973A.gnm6.ann1.Vradi07g23700/vigra.VC1973A.gnm6.ann1.Vradi08g12550/vigra.VC1973A.gnm6.ann1.Vradi07g01040/vigra.VC1973A.gnm6.ann1.Vradi07g03300/vigra.VC1973A.gnm6.ann1.Vradi07g30590/vigra.VC1973A.gnm6.ann1.Vradi05g13960/vigra.VC1973A.gnm6.ann1.Vradi08g08090/vigra.VC1973A.gnm6.ann1.Vradi08g10470/vigra.VC1973A.gnm6.ann1.Vradi06g01260/vigra.VC1973A.gnm6.ann1.Vradi11g09240/vigra.VC1973A.gnm6.…
Molecular function	GO:0016798	hydrolase activity, acting on glycosyl bonds	4.65622e-08	83	vigra.VC1973A.gnm6.ann1.Vradi0635s00020/novel.1214/vigra.VC1973A.gnm6.ann1.Vradi10g06200/vigra.VC1973A.gnm6.ann1.Vradi07g30810/vigra.VC1973A.gnm6.ann1.Vradi11g10440/vigra.VC1973A.gnm6.ann1.Vradi03g08610/vigra.VC1973A.gnm6.ann1.Vradi0206s00080/vigra.VC1973A.gnm6.ann1.Vradi05g15830/vigra.VC1973A.gnm6.ann1.Vradi07g09670/vigra.VC1973A.gnm6.ann1.Vradi10g08240/vigra.VC1973A.gnm6.ann1.Vradi05g18560/vigr…
Molecular function	GO:0020037	heme binding	6.20693e-08	81	novel.1295/novel.485/vigra.VC1973A.gnm6.ann1.Vradi06g06610/vigra.VC1973A.gnm6.ann1.Vradi07g03690/novel.1779/vigra.VC1973A.gnm6.ann1.Vradi0131s00110/novel.65/novel.3272/vigra.VC1973A.gnm6.ann1.Vradi07g24460/vigra.VC1973A.gnm6.ann1.Vradi0007s01920/vigra.VC1973A.gnm6.ann1.Vradi02g13960/vigra.VC1973A.gnm6.ann1.Vradi04g05800/vigra.VC1973A.gnm6.ann1.Vradi08g21470/vigra.VC1973A.gnm6.ann1.Vradi0007s01310…
Molecular function	GO:0046906	tetrapyrrole binding	6.20693e-08	81	novel.1295/novel.485/vigra.VC1973A.gnm6.ann1.Vradi06g06610/vigra.VC1973A.gnm6.ann1.Vradi07g03690/novel.1779/vigra.VC1973A.gnm6.ann1.Vradi0131s00110/novel.65/novel.3272/vigra.VC1973A.gnm6.ann1.Vradi07g24460/vigra.VC1973A.gnm6.ann1.Vradi0007s01920/vigra.VC1973A.gnm6.ann1.Vradi02g13960/vigra.VC1973A.gnm6.ann1.Vradi04g05800/vigra.VC1973A.gnm6.ann1.Vradi08g21470/vigra.VC1973A.gnm6.ann1.Vradi0007s01310…
Molecular function	GO:0008092	cytoskeletal protein binding	2.56297e-07	35	vigra.VC1973A.gnm6.ann1.Vradi10g07360/vigra.VC1973A.gnm6.ann1.Vradi07g23700/vigra.VC1973A.gnm6.ann1.Vradi07g22430/vigra.VC1973A.gnm6.ann1.Vradi08g11420/vigra.VC1973A.gnm6.ann1.Vradi08g12550/vigra.VC1973A.gnm6.ann1.Vradi07g01040/vigra.VC1973A.gnm6.ann1.Vradi07g03300/vigra.VC1973A.gnm6.ann1.Vradi03g01600/vigra.VC1973A.gnm6.ann1.Vradi07g30590/vigra.VC1973A.gnm6.ann1.Vradi05g13960/vigra.VC1973A.gnm6.…
Molecular function	GO:0004601	peroxidase activity	9.11068e-07	36	vigra.VC1973A.gnm6.ann1.Vradi06g06610/vigra.VC1973A.gnm6.ann1.Vradi11g02190/vigra.VC1973A.gnm6.ann1.Vradi07g24460/vigra.VC1973A.gnm6.ann1.Vradi0007s01920/vigra.VC1973A.gnm6.ann1.Vradi02g13960/vigra.VC1973A.gnm6.ann1.Vradi04g05800/vigra.VC1973A.gnm6.ann1.Vradi0007s01310/vigra.VC1973A.gnm6.ann1.Vradi0043s00080/vigra.VC1973A.gnm6.ann1.Vradi01g11690/vigra.VC1973A.gnm6.ann1.Vradi06g06580/vigra.VC1973A…
Molecular function	GO:0016684	oxidoreductase activity, acting on peroxide as acceptor	1.42327e-06	36	vigra.VC1973A.gnm6.ann1.Vradi06g06610/vigra.VC1973A.gnm6.ann1.Vradi11g02190/vigra.VC1973A.gnm6.ann1.Vradi07g24460/vigra.VC1973A.gnm6.ann1.Vradi0007s01920/vigra.VC1973A.gnm6.ann1.Vradi02g13960/vigra.VC1973A.gnm6.ann1.Vradi04g05800/vigra.VC1973A.gnm6.ann1.Vradi0007s01310/vigra.VC1973A.gnm6.ann1.Vradi0043s00080/vigra.VC1973A.gnm6.ann1.Vradi01g11690/vigra.VC1973A.gnm6.ann1.Vradi06g06580/vigra.VC1973A…
Molecular function	GO:0016209	antioxidant activity	1.81026e-06	37	vigra.VC1973A.gnm6.ann1.Vradi06g06610/vigra.VC1973A.gnm6.ann1.Vradi11g02190/vigra.VC1973A.gnm6.ann1.Vradi07g24460/vigra.VC1973A.gnm6.ann1.Vradi08g15680/vigra.VC1973A.gnm6.ann1.Vradi0007s01920/vigra.VC1973A.gnm6.ann1.Vradi02g13960/vigra.VC1973A.gnm6.ann1.Vradi04g05800/vigra.VC1973A.gnm6.ann1.Vradi0007s01310/vigra.VC1973A.gnm6.ann1.Vradi0043s00080/vigra.VC1973A.gnm6.ann1.Vradi01g11690/vigra.VC1973A…
Molecular function	GO:0003774	motor activity	2.45072e-06	27	vigra.VC1973A.gnm6.ann1.Vradi07g23700/vigra.VC1973A.gnm6.ann1.Vradi08g12550/vigra.VC1973A.gnm6.ann1.Vradi07g01040/vigra.VC1973A.gnm6.ann1.Vradi07g03300/vigra.VC1973A.gnm6.ann1.Vradi07g30590/vigra.VC1973A.gnm6.ann1.Vradi05g13960/vigra.VC1973A.gnm6.ann1.Vradi08g08090/vigra.VC1973A.gnm6.ann1.Vradi08g10470/vigra.VC1973A.gnm6.ann1.Vradi06g01260/vigra.VC1973A.gnm6.ann1.Vradi11g09240/vigra.VC1973A.gnm6.…
Molecular function	GO:0004866	endopeptidase inhibitor activity	1.77541e-05	12	vigra.VC1973A.gnm6.ann1.Vradi0282s00020/novel.109/vigra.VC1973A.gnm6.ann1.Vradi01g06050/vigra.VC1973A.gnm6.ann1.Vradi01g06610/vigra.VC1973A.gnm6.ann1.Vradi01g06070/vigra.VC1973A.gnm6.ann1.Vradi01g06090/novel.263/novel.99/novel.264/vigra.VC1973A.gnm6.ann1.Vradi06g08980/novel.3153/vigra.VC1973A.gnm6.ann1.Vradi01g06060
Molecular function	GO:0030414	peptidase inhibitor activity	1.77541e-05	12	vigra.VC1973A.gnm6.ann1.Vradi0282s00020/novel.109/vigra.VC1973A.gnm6.ann1.Vradi01g06050/vigra.VC1973A.gnm6.ann1.Vradi01g06610/vigra.VC1973A.gnm6.ann1.Vradi01g06070/vigra.VC1973A.gnm6.ann1.Vradi01g06090/novel.263/novel.99/novel.264/vigra.VC1973A.gnm6.ann1.Vradi06g08980/novel.3153/vigra.VC1973A.gnm6.ann1.Vradi01g06060
Molecular function	GO:0061134	peptidase regulator activity	1.77541e-05	12	vigra.VC1973A.gnm6.ann1.Vradi0282s00020/novel.109/vigra.VC1973A.gnm6.ann1.Vradi01g06050/vigra.VC1973A.gnm6.ann1.Vradi01g06610/vigra.VC1973A.gnm6.ann1.Vradi01g06070/vigra.VC1973A.gnm6.ann1.Vradi01g06090/novel.263/novel.99/novel.264/vigra.VC1973A.gnm6.ann1.Vradi06g08980/novel.3153/vigra.VC1973A.gnm6.ann1.Vradi01g06060
Molecular function	GO:0061135	endopeptidase regulator activity	1.77541e-05	12	vigra.VC1973A.gnm6.ann1.Vradi0282s00020/novel.109/vigra.VC1973A.gnm6.ann1.Vradi01g06050/vigra.VC1973A.gnm6.ann1.Vradi01g06610/vigra.VC1973A.gnm6.ann1.Vradi01g06070/vigra.VC1973A.gnm6.ann1.Vradi01g06090/novel.263/novel.99/novel.264/vigra.VC1973A.gnm6.ann1.Vradi06g08980/novel.3153/vigra.VC1973A.gnm6.ann1.Vradi01g06060
Molecular function	GO:0017111	nucleoside-triphosphatase activity	5.90436e-05	69	novel.376/vigra.VC1973A.gnm6.ann1.Vradi01g13100/vigra.VC1973A.gnm6.ann1.Vradi01g13150/novel.44/vigra.VC1973A.gnm6.ann1.Vradi01g13160/vigra.VC1973A.gnm6.ann1.Vradi01g02650/vigra.VC1973A.gnm6.ann1.Vradi08g01180/novel.3073/vigra.VC1973A.gnm6.ann1.Vradi0380s00030/novel.928/vigra.VC1973A.gnm6.ann1.Vradi09g03010/novel.377/vigra.VC1973A.gnm6.ann1.Vradi05g21430/vigra.VC1973A.gnm6.ann1.Vradi07g30530/vigra…
Molecular function	GO:0016462	pyrophosphatase activity	0.000141097	69	novel.376/vigra.VC1973A.gnm6.ann1.Vradi01g13100/vigra.VC1973A.gnm6.ann1.Vradi01g13150/novel.44/vigra.VC1973A.gnm6.ann1.Vradi01g13160/vigra.VC1973A.gnm6.ann1.Vradi01g02650/vigra.VC1973A.gnm6.ann1.Vradi08g01180/novel.3073/vigra.VC1973A.gnm6.ann1.Vradi0380s00030/novel.928/vigra.VC1973A.gnm6.ann1.Vradi09g03010/novel.377/vigra.VC1973A.gnm6.ann1.Vradi05g21430/vigra.VC1973A.gnm6.ann1.Vradi07g30530/vigra…
Molecular function	GO:0016818	hydrolase activity, acting on acid anhydrides, in phosphorus-containing anhydrides	0.000184911	70	novel.376/vigra.VC1973A.gnm6.ann1.Vradi01g13100/vigra.VC1973A.gnm6.ann1.Vradi01g13150/novel.44/vigra.VC1973A.gnm6.ann1.Vradi01g13160/vigra.VC1973A.gnm6.ann1.Vradi01g02650/vigra.VC1973A.gnm6.ann1.Vradi08g01180/novel.3073/vigra.VC1973A.gnm6.ann1.Vradi0380s00030/novel.928/vigra.VC1973A.gnm6.ann1.Vradi09g03010/novel.377/vigra.VC1973A.gnm6.ann1.Vradi05g21430/vigra.VC1973A.gnm6.ann1.Vradi07g30530/vigra…
Molecular function	GO:0016817	hydrolase activity, acting on acid anhydrides	0.000221163	70	novel.376/vigra.VC1973A.gnm6.ann1.Vradi01g13100/vigra.VC1973A.gnm6.ann1.Vradi01g13150/novel.44/vigra.VC1973A.gnm6.ann1.Vradi01g13160/vigra.VC1973A.gnm6.ann1.Vradi01g02650/vigra.VC1973A.gnm6.ann1.Vradi08g01180/novel.3073/vigra.VC1973A.gnm6.ann1.Vradi0380s00030/novel.928/vigra.VC1973A.gnm6.ann1.Vradi09g03010/novel.377/vigra.VC1973A.gnm6.ann1.Vradi05g21430/vigra.VC1973A.gnm6.ann1.Vradi07g30530/vigra…
Molecular function	GO:0004857	enzyme inhibitor activity	0.00036722	26	vigra.VC1973A.gnm6.ann1.Vradi07g27870/vigra.VC1973A.gnm6.ann1.Vradi0282s00020/vigra.VC1973A.gnm6.ann1.Vradi09g09290/novel.109/vigra.VC1973A.gnm6.ann1.Vradi07g24440/vigra.VC1973A.gnm6.ann1.Vradi01g06050/vigra.VC1973A.gnm6.ann1.Vradi01g06610/vigra.VC1973A.gnm6.ann1.Vradi05g21610/vigra.VC1973A.gnm6.ann1.Vradi11g00490/vigra.VC1973A.gnm6.ann1.Vradi01g06070/vigra.VC1973A.gnm6.ann1.Vradi09g09280/vigra.V…
Molecular function	GO:0005507	copper ion binding	0.000572149	17	vigra.VC1973A.gnm6.ann1.Vradi01g10370/vigra.VC1973A.gnm6.ann1.Vradi02g13130/vigra.VC1973A.gnm6.ann1.Vradi04g00560/vigra.VC1973A.gnm6.ann1.Vradi0111s00240/vigra.VC1973A.gnm6.ann1.Vradi0111s00040/vigra.VC1973A.gnm6.ann1.Vradi10g03490/vigra.VC1973A.gnm6.ann1.Vradi08g20560/vigra.VC1973A.gnm6.ann1.Vradi06g16270/vigra.VC1973A.gnm6.ann1.Vradi09g07310/vigra.VC1973A.gnm6.ann1.Vradi05g14240/vigra.VC1973A.g…
Molecular function	GO:0005506	iron ion binding	0.000657522	53	novel.1295/novel.485/vigra.VC1973A.gnm6.ann1.Vradi07g03690/novel.1779/vigra.VC1973A.gnm6.ann1.Vradi0131s00110/novel.65/novel.3272/vigra.VC1973A.gnm6.ann1.Vradi08g21470/novel.1694/novel.1637/vigra.VC1973A.gnm6.ann1.Vradi06g12780/vigra.VC1973A.gnm6.ann1.Vradi06g02170/novel.1778/vigra.VC1973A.gnm6.ann1.Vradi07g14480/novel.484/vigra.VC1973A.gnm6.ann1.Vradi01g13760/vigra.VC1973A.gnm6.ann1.Vradi03g0138…
Molecular function	GO:0016705	oxidoreductase activity, acting on paired donors, with incorporation or reduction of molecular oxygen	0.000869176	54	novel.1295/novel.485/vigra.VC1973A.gnm6.ann1.Vradi07g03690/novel.1779/vigra.VC1973A.gnm6.ann1.Vradi0131s00110/novel.65/novel.3272/vigra.VC1973A.gnm6.ann1.Vradi06g11750/vigra.VC1973A.gnm6.ann1.Vradi08g21470/novel.1694/vigra.VC1973A.gnm6.ann1.Vradi07g17300/novel.1637/vigra.VC1973A.gnm6.ann1.Vradi06g12780/vigra.VC1973A.gnm6.ann1.Vradi06g02170/novel.1778/vigra.VC1973A.gnm6.ann1.Vradi07g14480/novel.48…
Molecular function	GO:0098772	molecular function regulator	0.0022161	36	vigra.VC1973A.gnm6.ann1.Vradi07g27870/vigra.VC1973A.gnm6.ann1.Vradi0282s00020/vigra.VC1973A.gnm6.ann1.Vradi09g09490/vigra.VC1973A.gnm6.ann1.Vradi09g09290/novel.109/vigra.VC1973A.gnm6.ann1.Vradi07g24440/vigra.VC1973A.gnm6.ann1.Vradi01g06050/vigra.VC1973A.gnm6.ann1.Vradi01g06610/vigra.VC1973A.gnm6.ann1.Vradi05g21610/vigra.VC1973A.gnm6.ann1.Vradi11g00490/vigra.VC1973A.gnm6.ann1.Vradi01g06070/vigra.V…
Molecular function	GO:0004674	protein serine/threonine kinase activity	0.00282996	8	vigra.VC1973A.gnm6.ann1.Vradi05g17540/vigra.VC1973A.gnm6.ann1.Vradi02g10600/vigra.VC1973A.gnm6.ann1.Vradi02g11420/novel.1539/novel.3175/vigra.VC1973A.gnm6.ann1.Vradi10g11640/vigra.VC1973A.gnm6.ann1.Vradi02g03760/novel.1951
Molecular function	GO:0004650	polygalacturonase activity	0.00587107	12	vigra.VC1973A.gnm6.ann1.Vradi10g06200/vigra.VC1973A.gnm6.ann1.Vradi07g30810/vigra.VC1973A.gnm6.ann1.Vradi0206s00080/vigra.VC1973A.gnm6.ann1.Vradi07g09670/vigra.VC1973A.gnm6.ann1.Vradi04g06970/vigra.VC1973A.gnm6.ann1.Vradi01g00610/vigra.VC1973A.gnm6.ann1.Vradi0171s00250/vigra.VC1973A.gnm6.ann1.Vradi05g17010/vigra.VC1973A.gnm6.ann1.Vradi0206s00040/vigra.VC1973A.gnm6.ann1.Vradi08g11020/vigra.VC1973A…
Molecular function	GO:0030234	enzyme regulator activity	0.00667068	30	vigra.VC1973A.gnm6.ann1.Vradi07g27870/vigra.VC1973A.gnm6.ann1.Vradi0282s00020/vigra.VC1973A.gnm6.ann1.Vradi09g09290/novel.109/vigra.VC1973A.gnm6.ann1.Vradi07g24440/vigra.VC1973A.gnm6.ann1.Vradi01g06050/vigra.VC1973A.gnm6.ann1.Vradi01g06610/vigra.VC1973A.gnm6.ann1.Vradi05g21610/vigra.VC1973A.gnm6.ann1.Vradi11g00490/vigra.VC1973A.gnm6.ann1.Vradi01g06070/vigra.VC1973A.gnm6.ann1.Vradi09g09280/vigra.V…
Molecular function	GO:0003924	GTPase activity	0.00783396	15	novel.3073/vigra.VC1973A.gnm6.ann1.Vradi07g30530/vigra.VC1973A.gnm6.ann1.Vradi02g03750/vigra.VC1973A.gnm6.ann1.Vradi09g06260/vigra.VC1973A.gnm6.ann1.Vradi07g11590/vigra.VC1973A.gnm6.ann1.Vradi05g13910/vigra.VC1973A.gnm6.ann1.Vradi11g11890/vigra.VC1973A.gnm6.ann1.Vradi09g07240/vigra.VC1973A.gnm6.ann1.Vradi08g19840/vigra.VC1973A.gnm6.ann1.Vradi11g11270/vigra.VC1973A.gnm6.ann1.Vradi11g03780/vigra.VC…
Molecular function	GO:0016702	oxidoreductase activity, acting on single donors with incorporation of molecular oxygen, incorporation of two atoms of oxygen	0.010726	12	vigra.VC1973A.gnm6.ann1.Vradi0315s00160/vigra.VC1973A.gnm6.ann1.Vradi04g04580/novel.2718/vigra.VC1973A.gnm6.ann1.Vradi04g08570/novel.1115/vigra.VC1973A.gnm6.ann1.Vradi0187s00010/vigra.VC1973A.gnm6.ann1.Vradi05g00060/vigra.VC1973A.gnm6.ann1.Vradi0007s01550/vigra.VC1973A.gnm6.ann1.Vradi05g08760/vigra.VC1973A.gnm6.ann1.Vradi05g18970/novel.497/novel.2722
Molecular function	GO:0003700	DNA binding transcription factor activity	0.0129474	72	vigra.VC1973A.gnm6.ann1.Vradi06g02270/vigra.VC1973A.gnm6.ann1.Vradi10g06370/vigra.VC1973A.gnm6.ann1.Vradi05g05170/vigra.VC1973A.gnm6.ann1.Vradi05g16390/vigra.VC1973A.gnm6.ann1.Vradi08g10430/vigra.VC1973A.gnm6.ann1.Vradi03g01100/novel.2463/novel.1101/vigra.VC1973A.gnm6.ann1.Vradi0359s00040/vigra.VC1973A.gnm6.ann1.Vradi05g10480/vigra.VC1973A.gnm6.ann1.Vradi10g09040/vigra.VC1973A.gnm6.ann1.Vradi02g0…
Molecular function	GO:0016701	oxidoreductase activity, acting on single donors with incorporation of molecular oxygen	0.0144989	13	vigra.VC1973A.gnm6.ann1.Vradi0315s00160/vigra.VC1973A.gnm6.ann1.Vradi04g04580/novel.2718/vigra.VC1973A.gnm6.ann1.Vradi04g08570/vigra.VC1973A.gnm6.ann1.Vradi10g12410/novel.1115/vigra.VC1973A.gnm6.ann1.Vradi0187s00010/vigra.VC1973A.gnm6.ann1.Vradi05g00060/vigra.VC1973A.gnm6.ann1.Vradi0007s01550/vigra.VC1973A.gnm6.ann1.Vradi05g08760/vigra.VC1973A.gnm6.ann1.Vradi05g18970/novel.497/novel.2722
Molecular function	GO:0051213	dioxygenase activity	0.0153797	12	vigra.VC1973A.gnm6.ann1.Vradi0315s00160/vigra.VC1973A.gnm6.ann1.Vradi04g04580/novel.2718/vigra.VC1973A.gnm6.ann1.Vradi04g08570/novel.1115/vigra.VC1973A.gnm6.ann1.Vradi0187s00010/vigra.VC1973A.gnm6.ann1.Vradi05g00060/vigra.VC1973A.gnm6.ann1.Vradi0007s01550/vigra.VC1973A.gnm6.ann1.Vradi05g08760/vigra.VC1973A.gnm6.ann1.Vradi05g18970/novel.497/novel.2722
Molecular function	GO:0004659	prenyltransferase activity	0.0188006	6	vigra.VC1973A.gnm6.ann1.Vradi08g05710/vigra.VC1973A.gnm6.ann1.Vradi08g05740/vigra.VC1973A.gnm6.ann1.Vradi0073s00420/vigra.VC1973A.gnm6.ann1.Vradi0387s00040/vigra.VC1973A.gnm6.ann1.Vradi08g05700/vigra.VC1973A.gnm6.ann1.Vradi08g05750
Molecular function	GO:0030599	pectinesterase activity	0.0250241	12	vigra.VC1973A.gnm6.ann1.Vradi07g27870/vigra.VC1973A.gnm6.ann1.Vradi09g09290/vigra.VC1973A.gnm6.ann1.Vradi07g28720/vigra.VC1973A.gnm6.ann1.Vradi05g21610/vigra.VC1973A.gnm6.ann1.Vradi11g00490/vigra.VC1973A.gnm6.ann1.Vradi09g09280/vigra.VC1973A.gnm6.ann1.Vradi0289s00030/vigra.VC1973A.gnm6.ann1.Vradi03g06170/vigra.VC1973A.gnm6.ann1.Vradi11g02930/vigra.VC1973A.gnm6.ann1.Vradi0289s00090/vigra.VC1973A.g…
Molecular function	GO:0140110	transcription regulator activity	0.0264303	73	vigra.VC1973A.gnm6.ann1.Vradi06g02270/vigra.VC1973A.gnm6.ann1.Vradi10g06370/vigra.VC1973A.gnm6.ann1.Vradi05g05170/vigra.VC1973A.gnm6.ann1.Vradi05g16390/vigra.VC1973A.gnm6.ann1.Vradi07g02230/vigra.VC1973A.gnm6.ann1.Vradi08g10430/vigra.VC1973A.gnm6.ann1.Vradi03g01100/novel.2463/novel.1101/vigra.VC1973A.gnm6.ann1.Vradi0359s00040/vigra.VC1973A.gnm6.ann1.Vradi05g10480/vigra.VC1973A.gnm6.ann1.Vradi10g0…
Molecular function	GO:0015238	drug transmembrane transporter activity	0.031771	14	novel.419/novel.1092/vigra.VC1973A.gnm6.ann1.Vradi02g14410/vigra.VC1973A.gnm6.ann1.Vradi0007s01830/vigra.VC1973A.gnm6.ann1.Vradi01g00220/vigra.VC1973A.gnm6.ann1.Vradi01g13650/vigra.VC1973A.gnm6.ann1.Vradi06g00090/vigra.VC1973A.gnm6.ann1.Vradi05g22600/vigra.VC1973A.gnm6.ann1.Vradi05g07460/vigra.VC1973A.gnm6.ann1.Vradi11g10040/vigra.VC1973A.gnm6.ann1.Vradi11g10030/novel.2418/vigra.VC1973A.gnm6.ann1…
Molecular function	GO:0016614	oxidoreductase activity, acting on CH-OH group of donors	0.0327371	27	vigra.VC1973A.gnm6.ann1.Vradi01g00840/vigra.VC1973A.gnm6.ann1.Vradi09g00400/vigra.VC1973A.gnm6.ann1.Vradi11g07350/vigra.VC1973A.gnm6.ann1.Vradi05g08600/vigra.VC1973A.gnm6.ann1.Vradi0048s00090/vigra.VC1973A.gnm6.ann1.Vradi0048s00200/vigra.VC1973A.gnm6.ann1.Vradi0048s00600/vigra.VC1973A.gnm6.ann1.Vradi09g01700/vigra.VC1973A.gnm6.ann1.Vradi0048s00560/vigra.VC1973A.gnm6.ann1.Vradi05g13490/vigra.VC197…
Molecular function	GO:0043565	sequence-specific DNA binding	0.0427032	41	vigra.VC1973A.gnm6.ann1.Vradi06g02270/vigra.VC1973A.gnm6.ann1.Vradi10g06370/vigra.VC1973A.gnm6.ann1.Vradi05g05170/vigra.VC1973A.gnm6.ann1.Vradi03g01100/novel.2463/novel.1101/vigra.VC1973A.gnm6.ann1.Vradi02g02960/vigra.VC1973A.gnm6.ann1.Vradi08g09150/vigra.VC1973A.gnm6.ann1.Vradi05g18150/vigra.VC1973A.gnm6.ann1.Vradi02g12480/vigra.VC1973A.gnm6.ann1.Vradi09g05540/vigra.VC1973A.gnm6.ann1.Vradi03g066…
Molecular function	GO:0022857	transmembrane transporter activity	0.0450813	74	novel.376/vigra.VC1973A.gnm6.ann1.Vradi01g13100/vigra.VC1973A.gnm6.ann1.Vradi01g13150/vigra.VC1973A.gnm6.ann1.Vradi05g23300/vigra.VC1973A.gnm6.ann1.Vradi01g13160/novel.48/vigra.VC1973A.gnm6.ann1.Vradi0327s00040/vigra.VC1973A.gnm6.ann1.Vradi0315s00100/novel.928/vigra.VC1973A.gnm6.ann1.Vradi0169s00180/vigra.VC1973A.gnm6.ann1.Vradi05g23290/vigra.VC1973A.gnm6.ann1.Vradi06g07960/vigra.VC1973A.gnm6.ann…
Molecular function	GO:0016765	transferase activity, transferring alkyl or aryl (other than methyl) groups	0.0463516	10	vigra.VC1973A.gnm6.ann1.Vradi08g05710/vigra.VC1973A.gnm6.ann1.Vradi08g05740/vigra.VC1973A.gnm6.ann1.Vradi05g19040/vigra.VC1973A.gnm6.ann1.Vradi0073s00420/vigra.VC1973A.gnm6.ann1.Vradi0387s00040/vigra.VC1973A.gnm6.ann1.Vradi08g05700/novel.2219/vigra.VC1973A.gnm6.ann1.Vradi08g05750/novel.931/novel.920
Molecular function	GO:0004252	serine-type endopeptidase activity	0.0511684	15	vigra.VC1973A.gnm6.ann1.Vradi08g07280/vigra.VC1973A.gnm6.ann1.Vradi07g23410/novel.2463/novel.858/vigra.VC1973A.gnm6.ann1.Vradi08g19310/vigra.VC1973A.gnm6.ann1.Vradi0122s00080/vigra.VC1973A.gnm6.ann1.Vradi10g09630/vigra.VC1973A.gnm6.ann1.Vradi04g08170/novel.1762/vigra.VC1973A.gnm6.ann1.Vradi07g22530/vigra.VC1973A.gnm6.ann1.Vradi05g02930/vigra.VC1973A.gnm6.ann1.Vradi03g08470/vigra.VC1973A.gnm6.ann1…
Molecular function	GO:0004743	pyruvate kinase activity	0.0649419	4	vigra.VC1973A.gnm6.ann1.Vradi01g00090/vigra.VC1973A.gnm6.ann1.Vradi08g18320/vigra.VC1973A.gnm6.ann1.Vradi03g04110/vigra.VC1973A.gnm6.ann1.Vradi08g16180
Molecular function	GO:0015116	sulfate transmembrane transporter activity	0.0649419	4	vigra.VC1973A.gnm6.ann1.Vradi05g07730/vigra.VC1973A.gnm6.ann1.Vradi05g20190/vigra.VC1973A.gnm6.ann1.Vradi01g04240/vigra.VC1973A.gnm6.ann1.Vradi06g07640
Molecular function	GO:0030955	potassium ion binding	0.0649419	4	vigra.VC1973A.gnm6.ann1.Vradi01g00090/vigra.VC1973A.gnm6.ann1.Vradi08g18320/vigra.VC1973A.gnm6.ann1.Vradi03g04110/vigra.VC1973A.gnm6.ann1.Vradi08g16180
Molecular function	GO:0031420	alkali metal ion binding	0.0649419	4	vigra.VC1973A.gnm6.ann1.Vradi01g00090/vigra.VC1973A.gnm6.ann1.Vradi08g18320/vigra.VC1973A.gnm6.ann1.Vradi03g04110/vigra.VC1973A.gnm6.ann1.Vradi08g16180
Molecular function	GO:1901682	sulfur compound transmembrane transporter activity	0.0649419	4	vigra.VC1973A.gnm6.ann1.Vradi05g07730/vigra.VC1973A.gnm6.ann1.Vradi05g20190/vigra.VC1973A.gnm6.ann1.Vradi01g04240/vigra.VC1973A.gnm6.ann1.Vradi06g07640
Molecular function	GO:0003993	acid phosphatase activity	0.065912	5	vigra.VC1973A.gnm6.ann1.Vradi10g00550/vigra.VC1973A.gnm6.ann1.Vradi03g04490/vigra.VC1973A.gnm6.ann1.Vradi07g13490/vigra.VC1973A.gnm6.ann1.Vradi0100s00640/vigra.VC1973A.gnm6.ann1.Vradi03g04480
Molecular function	GO:0016616	oxidoreductase activity, acting on the CH-OH group of donors, NAD or NADP as acceptor	0.0681145	16	vigra.VC1973A.gnm6.ann1.Vradi01g00840/vigra.VC1973A.gnm6.ann1.Vradi11g07350/vigra.VC1973A.gnm6.ann1.Vradi05g08600/vigra.VC1973A.gnm6.ann1.Vradi09g01700/vigra.VC1973A.gnm6.ann1.Vradi10g05180/vigra.VC1973A.gnm6.ann1.Vradi05g20670/vigra.VC1973A.gnm6.ann1.Vradi07g28600/vigra.VC1973A.gnm6.ann1.Vradi07g12670/vigra.VC1973A.gnm6.ann1.Vradi08g12900/vigra.VC1973A.gnm6.ann1.Vradi08g20360/vigra.VC1973A.gnm6.…
Molecular function	GO:0015297	antiporter activity	0.0713364	18	novel.419/novel.1092/vigra.VC1973A.gnm6.ann1.Vradi02g14410/vigra.VC1973A.gnm6.ann1.Vradi0007s01830/vigra.VC1973A.gnm6.ann1.Vradi01g00220/vigra.VC1973A.gnm6.ann1.Vradi01g13650/vigra.VC1973A.gnm6.ann1.Vradi06g00090/vigra.VC1973A.gnm6.ann1.Vradi05g22600/vigra.VC1973A.gnm6.ann1.Vradi05g07460/vigra.VC1973A.gnm6.ann1.Vradi07g09000/vigra.VC1973A.gnm6.ann1.Vradi11g10040/vigra.VC1973A.gnm6.ann1.Vradi08g12…
Molecular function	GO:0022804	active transmembrane transporter activity	0.0743453	30	novel.376/vigra.VC1973A.gnm6.ann1.Vradi01g13100/vigra.VC1973A.gnm6.ann1.Vradi01g13150/vigra.VC1973A.gnm6.ann1.Vradi01g13160/novel.928/novel.419/novel.377/novel.1092/vigra.VC1973A.gnm6.ann1.Vradi02g14410/vigra.VC1973A.gnm6.ann1.Vradi0007s01830/vigra.VC1973A.gnm6.ann1.Vradi05g21430/vigra.VC1973A.gnm6.ann1.Vradi01g00220/novel.1411/vigra.VC1973A.gnm6.ann1.Vradi01g13650/vigra.VC1973A.gnm6.ann1.Vradi06…
Molecular function	GO:0051087	chaperone binding	0.0816144	5	vigra.VC1973A.gnm6.ann1.Vradi04g10380/vigra.VC1973A.gnm6.ann1.Vradi09g03830/vigra.VC1973A.gnm6.ann1.Vradi10g09410/vigra.VC1973A.gnm6.ann1.Vradi06g01480/vigra.VC1973A.gnm6.ann1.Vradi04g10370
Molecular function	GO:0016757	transferase activity, transferring glycosyl groups	0.0851659	58	vigra.VC1973A.gnm6.ann1.Vradi01g06100/vigra.VC1973A.gnm6.ann1.Vradi06g02140/vigra.VC1973A.gnm6.ann1.Vradi01g06080/novel.565/vigra.VC1973A.gnm6.ann1.Vradi0246s00280/vigra.VC1973A.gnm6.ann1.Vradi10g01720/vigra.VC1973A.gnm6.ann1.Vradi04g04000/vigra.VC1973A.gnm6.ann1.Vradi01g07780/novel.122/vigra.VC1973A.gnm6.ann1.Vradi08g21840/vigra.VC1973A.gnm6.ann1.Vradi03g06190/novel.3210/novel.2752/vigra.VC1973A…
Molecular function	GO:0016758	transferase activity, transferring hexosyl groups	0.0943728	47	vigra.VC1973A.gnm6.ann1.Vradi01g06100/vigra.VC1973A.gnm6.ann1.Vradi01g06080/novel.565/vigra.VC1973A.gnm6.ann1.Vradi0246s00280/vigra.VC1973A.gnm6.ann1.Vradi10g01720/vigra.VC1973A.gnm6.ann1.Vradi04g04000/novel.122/vigra.VC1973A.gnm6.ann1.Vradi08g21840/vigra.VC1973A.gnm6.ann1.Vradi03g06190/novel.3210/novel.2752/vigra.VC1973A.gnm6.ann1.Vradi0023s00080/novel.121/vigra.VC1973A.gnm6.ann1.Vradi0407s00010…
Molecular function	GO:0015291	secondary active transmembrane transporter activity	0.105711	18	novel.419/novel.1092/vigra.VC1973A.gnm6.ann1.Vradi02g14410/vigra.VC1973A.gnm6.ann1.Vradi0007s01830/vigra.VC1973A.gnm6.ann1.Vradi01g00220/vigra.VC1973A.gnm6.ann1.Vradi01g13650/vigra.VC1973A.gnm6.ann1.Vradi06g00090/vigra.VC1973A.gnm6.ann1.Vradi05g22600/vigra.VC1973A.gnm6.ann1.Vradi05g07460/vigra.VC1973A.gnm6.ann1.Vradi07g09000/vigra.VC1973A.gnm6.ann1.Vradi11g10040/vigra.VC1973A.gnm6.ann1.Vradi08g12…
Molecular function	GO:0005088	Ras guanyl-nucleotide exchange factor activity	0.10595	4	vigra.VC1973A.gnm6.ann1.Vradi06g04900/vigra.VC1973A.gnm6.ann1.Vradi11g07710/vigra.VC1973A.gnm6.ann1.Vradi04g06740/vigra.VC1973A.gnm6.ann1.Vradi03g08490
Molecular function	GO:0005089	Rho guanyl-nucleotide exchange factor activity	0.10595	4	vigra.VC1973A.gnm6.ann1.Vradi06g04900/vigra.VC1973A.gnm6.ann1.Vradi11g07710/vigra.VC1973A.gnm6.ann1.Vradi04g06740/vigra.VC1973A.gnm6.ann1.Vradi03g08490
Molecular function	GO:0016638	oxidoreductase activity, acting on the CH-NH2 group of donors	0.10595	4	vigra.VC1973A.gnm6.ann1.Vradi10g01300/novel.3223/novel.3219/novel.3224
Molecular function	GO:0017048	Rho GTPase binding	0.10595	4	vigra.VC1973A.gnm6.ann1.Vradi06g04900/vigra.VC1973A.gnm6.ann1.Vradi11g07710/vigra.VC1973A.gnm6.ann1.Vradi04g06740/vigra.VC1973A.gnm6.ann1.Vradi03g08490
Molecular function	GO:0052689	carboxylic ester hydrolase activity	0.124424	13	vigra.VC1973A.gnm6.ann1.Vradi07g27870/vigra.VC1973A.gnm6.ann1.Vradi09g09290/vigra.VC1973A.gnm6.ann1.Vradi07g28720/vigra.VC1973A.gnm6.ann1.Vradi05g21610/vigra.VC1973A.gnm6.ann1.Vradi11g00490/vigra.VC1973A.gnm6.ann1.Vradi09g09280/vigra.VC1973A.gnm6.ann1.Vradi0289s00030/vigra.VC1973A.gnm6.ann1.Vradi0154s00310/vigra.VC1973A.gnm6.ann1.Vradi03g06170/vigra.VC1973A.gnm6.ann1.Vradi11g02930/vigra.VC1973A.g…
Molecular function	GO:0005085	guanyl-nucleotide exchange factor activity	0.139115	5	vigra.VC1973A.gnm6.ann1.Vradi09g09490/vigra.VC1973A.gnm6.ann1.Vradi06g04900/vigra.VC1973A.gnm6.ann1.Vradi11g07710/vigra.VC1973A.gnm6.ann1.Vradi04g06740/vigra.VC1973A.gnm6.ann1.Vradi03g08490
Molecular function	GO:0017016	Ras GTPase binding	0.139115	5	vigra.VC1973A.gnm6.ann1.Vradi06g04900/vigra.VC1973A.gnm6.ann1.Vradi0083s00830/vigra.VC1973A.gnm6.ann1.Vradi11g07710/vigra.VC1973A.gnm6.ann1.Vradi04g06740/vigra.VC1973A.gnm6.ann1.Vradi03g08490
Molecular function	GO:0031267	small GTPase binding	0.139115	5	vigra.VC1973A.gnm6.ann1.Vradi06g04900/vigra.VC1973A.gnm6.ann1.Vradi0083s00830/vigra.VC1973A.gnm6.ann1.Vradi11g07710/vigra.VC1973A.gnm6.ann1.Vradi04g06740/vigra.VC1973A.gnm6.ann1.Vradi03g08490
Molecular function	GO:0031406	carboxylic acid binding	0.139115	5	novel.3517/vigra.VC1973A.gnm6.ann1.Vradi06g11600/vigra.VC1973A.gnm6.ann1.Vradi11g12350/vigra.VC1973A.gnm6.ann1.Vradi08g20360/vigra.VC1973A.gnm6.ann1.Vradi0184s00260
Molecular function	GO:0043177	organic acid binding	0.139115	5	novel.3517/vigra.VC1973A.gnm6.ann1.Vradi06g11600/vigra.VC1973A.gnm6.ann1.Vradi11g12350/vigra.VC1973A.gnm6.ann1.Vradi08g20360/vigra.VC1973A.gnm6.ann1.Vradi0184s00260
Molecular function	GO:0016641	oxidoreductase activity, acting on the CH-NH2 group of donors, oxygen as acceptor	0.139166	3	novel.3223/novel.3219/novel.3224
Molecular function	GO:0048038	quinone binding	0.139166	3	novel.3223/novel.3219/novel.3224
Molecular function	GO:0016829	lyase activity	0.145221	27	vigra.VC1973A.gnm6.ann1.Vradi02g10980/vigra.VC1973A.gnm6.ann1.Vradi02g09050/vigra.VC1973A.gnm6.ann1.Vradi0393s00080/vigra.VC1973A.gnm6.ann1.Vradi05g04090/vigra.VC1973A.gnm6.ann1.Vradi03g00870/vigra.VC1973A.gnm6.ann1.Vradi01g11770/vigra.VC1973A.gnm6.ann1.Vradi01g05710/vigra.VC1973A.gnm6.ann1.Vradi01g06780/novel.1394/vigra.VC1973A.gnm6.ann1.Vradi05g01940/vigra.VC1973A.gnm6.ann1.Vradi03g02630/novel.…
Molecular function	GO:0046982	protein heterodimerization activity	0.153074	9	vigra.VC1973A.gnm6.ann1.Vradi0361s00030/vigra.VC1973A.gnm6.ann1.Vradi07g24390/vigra.VC1973A.gnm6.ann1.Vradi02g10740/vigra.VC1973A.gnm6.ann1.Vradi10g03540/vigra.VC1973A.gnm6.ann1.Vradi0209s00040/vigra.VC1973A.gnm6.ann1.Vradi03g01170/vigra.VC1973A.gnm6.ann1.Vradi06g07100/vigra.VC1973A.gnm6.ann1.Vradi08g12490/vigra.VC1973A.gnm6.ann1.Vradi09g03470
Molecular function	GO:0008081	phosphoric diester hydrolase activity	0.161996	6	vigra.VC1973A.gnm6.ann1.Vradi07g04050/vigra.VC1973A.gnm6.ann1.Vradi04g09370/vigra.VC1973A.gnm6.ann1.Vradi06g04520/vigra.VC1973A.gnm6.ann1.Vradi06g01310/vigra.VC1973A.gnm6.ann1.Vradi04g05020/vigra.VC1973A.gnm6.ann1.Vradi10g02400
Molecular function	GO:0051020	GTPase binding	0.161996	6	vigra.VC1973A.gnm6.ann1.Vradi09g09490/vigra.VC1973A.gnm6.ann1.Vradi06g04900/vigra.VC1973A.gnm6.ann1.Vradi0083s00830/vigra.VC1973A.gnm6.ann1.Vradi11g07710/vigra.VC1973A.gnm6.ann1.Vradi04g06740/vigra.VC1973A.gnm6.ann1.Vradi03g08490
Molecular function	GO:0008519	ammonium transmembrane transporter activity	0.173259	3	vigra.VC1973A.gnm6.ann1.Vradi0221s00090/vigra.VC1973A.gnm6.ann1.Vradi07g31300/vigra.VC1973A.gnm6.ann1.Vradi08g05120
Molecular function	GO:0016831	carboxy-lyase activity	0.178595	7	vigra.VC1973A.gnm6.ann1.Vradi01g05710/vigra.VC1973A.gnm6.ann1.Vradi03g02630/vigra.VC1973A.gnm6.ann1.Vradi0343s00030/vigra.VC1973A.gnm6.ann1.Vradi0389s00050/vigra.VC1973A.gnm6.ann1.Vradi0236s00040/vigra.VC1973A.gnm6.ann1.Vradi0023s00540/vigra.VC1973A.gnm6.ann1.Vradi0433s00010
Molecular function	GO:0016762	xyloglucan:xyloglucosyl transferase activity	0.182663	6	vigra.VC1973A.gnm6.ann1.Vradi04g04000/vigra.VC1973A.gnm6.ann1.Vradi02g06230/vigra.VC1973A.gnm6.ann1.Vradi0450s00100/vigra.VC1973A.gnm6.ann1.Vradi0073s00060/vigra.VC1973A.gnm6.ann1.Vradi05g22880/novel.238
Molecular function	GO:0016835	carbon-oxygen lyase activity	0.19599	13	vigra.VC1973A.gnm6.ann1.Vradi02g10980/vigra.VC1973A.gnm6.ann1.Vradi02g09050/vigra.VC1973A.gnm6.ann1.Vradi05g04090/vigra.VC1973A.gnm6.ann1.Vradi03g00870/vigra.VC1973A.gnm6.ann1.Vradi01g06780/novel.1394/novel.3253/vigra.VC1973A.gnm6.ann1.Vradi10g05180/vigra.VC1973A.gnm6.ann1.Vradi05g12870/vigra.VC1973A.gnm6.ann1.Vradi08g12900/novel.3254/vigra.VC1973A.gnm6.ann1.Vradi07g16190/vigra.VC1973A.gnm6.ann1.…
Molecular function	GO:0042626	ATPase activity, coupled to transmembrane movement of substances	0.204912	12	novel.376/vigra.VC1973A.gnm6.ann1.Vradi01g13100/vigra.VC1973A.gnm6.ann1.Vradi01g13150/vigra.VC1973A.gnm6.ann1.Vradi01g13160/novel.928/novel.377/vigra.VC1973A.gnm6.ann1.Vradi05g21430/novel.1411/vigra.VC1973A.gnm6.ann1.Vradi09g06330/vigra.VC1973A.gnm6.ann1.Vradi0381s00060/vigra.VC1973A.gnm6.ann1.Vradi03g03670/novel.482
Molecular function	GO:0043492	ATPase activity, coupled to movement of substances	0.204912	12	novel.376/vigra.VC1973A.gnm6.ann1.Vradi01g13100/vigra.VC1973A.gnm6.ann1.Vradi01g13150/vigra.VC1973A.gnm6.ann1.Vradi01g13160/novel.928/novel.377/vigra.VC1973A.gnm6.ann1.Vradi05g21430/novel.1411/vigra.VC1973A.gnm6.ann1.Vradi09g06330/vigra.VC1973A.gnm6.ann1.Vradi0381s00060/vigra.VC1973A.gnm6.ann1.Vradi03g03670/novel.482
Molecular function	GO:0003872	6-phosphofructokinase activity	0.209365	3	vigra.VC1973A.gnm6.ann1.Vradi05g20770/vigra.VC1973A.gnm6.ann1.Vradi07g28810/vigra.VC1973A.gnm6.ann1.Vradi10g07790
Molecular function	GO:0000287	magnesium ion binding	0.209472	13	vigra.VC1973A.gnm6.ann1.Vradi02g10980/vigra.VC1973A.gnm6.ann1.Vradi02g09050/vigra.VC1973A.gnm6.ann1.Vradi10g10250/vigra.VC1973A.gnm6.ann1.Vradi03g00870/vigra.VC1973A.gnm6.ann1.Vradi01g06780/novel.1394/vigra.VC1973A.gnm6.ann1.Vradi01g00090/vigra.VC1973A.gnm6.ann1.Vradi08g18320/novel.3253/vigra.VC1973A.gnm6.ann1.Vradi03g04110/vigra.VC1973A.gnm6.ann1.Vradi08g16180/novel.3254/vigra.VC1973A.gnm6.ann1.…
Molecular function	GO:0016838	carbon-oxygen lyase activity, acting on phosphates	0.238698	7	vigra.VC1973A.gnm6.ann1.Vradi02g10980/vigra.VC1973A.gnm6.ann1.Vradi02g09050/vigra.VC1973A.gnm6.ann1.Vradi03g00870/novel.1394/novel.3253/novel.3254/vigra.VC1973A.gnm6.ann1.Vradi01g01400
Molecular function	GO:0004970	ionotropic glutamate receptor activity	0.246907	3	vigra.VC1973A.gnm6.ann1.Vradi05g23300/vigra.VC1973A.gnm6.ann1.Vradi05g23290/novel.1304
Molecular function	GO:0005230	extracellular ligand-gated ion channel activity	0.246907	3	vigra.VC1973A.gnm6.ann1.Vradi05g23300/vigra.VC1973A.gnm6.ann1.Vradi05g23290/novel.1304
Molecular function	GO:0008066	glutamate receptor activity	0.246907	3	vigra.VC1973A.gnm6.ann1.Vradi05g23300/vigra.VC1973A.gnm6.ann1.Vradi05g23290/novel.1304
Molecular function	GO:0015276	ligand-gated ion channel activity	0.246907	3	vigra.VC1973A.gnm6.ann1.Vradi05g23300/vigra.VC1973A.gnm6.ann1.Vradi05g23290/novel.1304
Molecular function	GO:0022824	transmitter-gated ion channel activity	0.246907	3	vigra.VC1973A.gnm6.ann1.Vradi05g23300/vigra.VC1973A.gnm6.ann1.Vradi05g23290/novel.1304
Molecular function	GO:0022834	ligand-gated channel activity	0.246907	3	vigra.VC1973A.gnm6.ann1.Vradi05g23300/vigra.VC1973A.gnm6.ann1.Vradi05g23290/novel.1304
Molecular function	GO:0022835	transmitter-gated channel activity	0.246907	3	vigra.VC1973A.gnm6.ann1.Vradi05g23300/vigra.VC1973A.gnm6.ann1.Vradi05g23290/novel.1304
Molecular function	GO:0030594	neurotransmitter receptor activity	0.246907	3	vigra.VC1973A.gnm6.ann1.Vradi05g23300/vigra.VC1973A.gnm6.ann1.Vradi05g23290/novel.1304
Molecular function	GO:0042623	ATPase activity, coupled	0.256046	15	novel.376/vigra.VC1973A.gnm6.ann1.Vradi01g13100/vigra.VC1973A.gnm6.ann1.Vradi01g13150/novel.44/vigra.VC1973A.gnm6.ann1.Vradi01g13160/novel.928/novel.377/vigra.VC1973A.gnm6.ann1.Vradi05g21430/novel.1411/vigra.VC1973A.gnm6.ann1.Vradi09g06330/vigra.VC1973A.gnm6.ann1.Vradi05g17120/vigra.VC1973A.gnm6.ann1.Vradi0381s00060/vigra.VC1973A.gnm6.ann1.Vradi03g03670/vigra.VC1973A.gnm6.ann1.Vradi06g16190/novel…
Molecular function	GO:0046983	protein dimerization activity	0.260485	43	vigra.VC1973A.gnm6.ann1.Vradi07g14230/novel.1047/vigra.VC1973A.gnm6.ann1.Vradi06g04380/vigra.VC1973A.gnm6.ann1.Vradi0267s00040/novel.1781/vigra.VC1973A.gnm6.ann1.Vradi06g08080/novel.1641/vigra.VC1973A.gnm6.ann1.Vradi0361s00030/vigra.VC1973A.gnm6.ann1.Vradi05g08260/vigra.VC1973A.gnm6.ann1.Vradi11g09130/vigra.VC1973A.gnm6.ann1.Vradi07g11610/vigra.VC1973A.gnm6.ann1.Vradi05g07430/vigra.VC1973A.gnm6.a…
Molecular function	GO:0015399	primary active transmembrane transporter activity	0.264959	12	novel.376/vigra.VC1973A.gnm6.ann1.Vradi01g13100/vigra.VC1973A.gnm6.ann1.Vradi01g13150/vigra.VC1973A.gnm6.ann1.Vradi01g13160/novel.928/novel.377/vigra.VC1973A.gnm6.ann1.Vradi05g21430/novel.1411/vigra.VC1973A.gnm6.ann1.Vradi09g06330/vigra.VC1973A.gnm6.ann1.Vradi0381s00060/vigra.VC1973A.gnm6.ann1.Vradi03g03670/novel.482
Molecular function	GO:0015405	P-P-bond-hydrolysis-driven transmembrane transporter activity	0.264959	12	novel.376/vigra.VC1973A.gnm6.ann1.Vradi01g13100/vigra.VC1973A.gnm6.ann1.Vradi01g13150/vigra.VC1973A.gnm6.ann1.Vradi01g13160/novel.928/novel.377/vigra.VC1973A.gnm6.ann1.Vradi05g21430/novel.1411/vigra.VC1973A.gnm6.ann1.Vradi09g06330/vigra.VC1973A.gnm6.ann1.Vradi0381s00060/vigra.VC1973A.gnm6.ann1.Vradi03g03670/novel.482
Molecular function	GO:0008171	O-methyltransferase activity	0.273926	6	vigra.VC1973A.gnm6.ann1.Vradi0267s00040/novel.1781/novel.1179/vigra.VC1973A.gnm6.ann1.Vradi05g00320/novel.438/novel.1210
Molecular function	GO:0016836	hydro-lyase activity	0.273926	6	vigra.VC1973A.gnm6.ann1.Vradi05g04090/vigra.VC1973A.gnm6.ann1.Vradi01g06780/vigra.VC1973A.gnm6.ann1.Vradi10g05180/vigra.VC1973A.gnm6.ann1.Vradi05g12870/vigra.VC1973A.gnm6.ann1.Vradi08g12900/vigra.VC1973A.gnm6.ann1.Vradi07g16190
Molecular function	GO:0008443	phosphofructokinase activity	0.285349	3	vigra.VC1973A.gnm6.ann1.Vradi05g20770/vigra.VC1973A.gnm6.ann1.Vradi07g28810/vigra.VC1973A.gnm6.ann1.Vradi10g07790
Molecular function	GO:0019200	carbohydrate kinase activity	0.285349	3	vigra.VC1973A.gnm6.ann1.Vradi05g20770/vigra.VC1973A.gnm6.ann1.Vradi07g28810/vigra.VC1973A.gnm6.ann1.Vradi10g07790
Molecular function	GO:0001871	pattern binding	0.287413	8	vigra.VC1973A.gnm6.ann1.Vradi06g11570/vigra.VC1973A.gnm6.ann1.Vradi06g11540/vigra.VC1973A.gnm6.ann1.Vradi03g08400/vigra.VC1973A.gnm6.ann1.Vradi10g05970/novel.1830/novel.1094/vigra.VC1973A.gnm6.ann1.Vradi07g26900/vigra.VC1973A.gnm6.ann1.Vradi0223s00040
Molecular function	GO:0030247	polysaccharide binding	0.287413	8	vigra.VC1973A.gnm6.ann1.Vradi06g11570/vigra.VC1973A.gnm6.ann1.Vradi06g11540/vigra.VC1973A.gnm6.ann1.Vradi03g08400/vigra.VC1973A.gnm6.ann1.Vradi10g05970/novel.1830/novel.1094/vigra.VC1973A.gnm6.ann1.Vradi07g26900/vigra.VC1973A.gnm6.ann1.Vradi0223s00040
Molecular function	GO:0010333	terpene synthase activity	0.298308	6	vigra.VC1973A.gnm6.ann1.Vradi02g10980/vigra.VC1973A.gnm6.ann1.Vradi02g09050/vigra.VC1973A.gnm6.ann1.Vradi03g00870/novel.1394/novel.3253/novel.3254
Molecular function	GO:0016788	hydrolase activity, acting on ester bonds	0.309098	47	vigra.VC1973A.gnm6.ann1.Vradi07g27870/vigra.VC1973A.gnm6.ann1.Vradi10g06430/vigra.VC1973A.gnm6.ann1.Vradi10g00550/novel.103/vigra.VC1973A.gnm6.ann1.Vradi05g05460/vigra.VC1973A.gnm6.ann1.Vradi07g01680/vigra.VC1973A.gnm6.ann1.Vradi09g09290/vigra.VC1973A.gnm6.ann1.Vradi07g04050/vigra.VC1973A.gnm6.ann1.Vradi08g12800/vigra.VC1973A.gnm6.ann1.Vradi03g04490/novel.1853/vigra.VC1973A.gnm6.ann1.Vradi07g2872…
Molecular function	GO:0016887	ATPase activity	0.314182	24	novel.376/vigra.VC1973A.gnm6.ann1.Vradi01g13100/vigra.VC1973A.gnm6.ann1.Vradi01g13150/novel.44/vigra.VC1973A.gnm6.ann1.Vradi01g13160/vigra.VC1973A.gnm6.ann1.Vradi01g02650/vigra.VC1973A.gnm6.ann1.Vradi0380s00030/novel.928/vigra.VC1973A.gnm6.ann1.Vradi09g03010/novel.377/vigra.VC1973A.gnm6.ann1.Vradi05g21430/novel.2218/vigra.VC1973A.gnm6.ann1.Vradi03g09340/novel.1411/novel.1986/novel.822/vigra.VC197…
Molecular function	GO:0008236	serine-type peptidase activity	0.320439	20	vigra.VC1973A.gnm6.ann1.Vradi08g07280/vigra.VC1973A.gnm6.ann1.Vradi07g23410/novel.2463/novel.858/vigra.VC1973A.gnm6.ann1.Vradi08g19310/vigra.VC1973A.gnm6.ann1.Vradi0122s00080/vigra.VC1973A.gnm6.ann1.Vradi10g09630/vigra.VC1973A.gnm6.ann1.Vradi04g08170/novel.1762/vigra.VC1973A.gnm6.ann1.Vradi07g22530/vigra.VC1973A.gnm6.ann1.Vradi05g02930/vigra.VC1973A.gnm6.ann1.Vradi01g08800/vigra.VC1973A.gnm6.ann1…
Molecular function	GO:0017171	serine hydrolase activity	0.320439	20	vigra.VC1973A.gnm6.ann1.Vradi08g07280/vigra.VC1973A.gnm6.ann1.Vradi07g23410/novel.2463/novel.858/vigra.VC1973A.gnm6.ann1.Vradi08g19310/vigra.VC1973A.gnm6.ann1.Vradi0122s00080/vigra.VC1973A.gnm6.ann1.Vradi10g09630/vigra.VC1973A.gnm6.ann1.Vradi04g08170/novel.1762/vigra.VC1973A.gnm6.ann1.Vradi07g22530/vigra.VC1973A.gnm6.ann1.Vradi05g02930/vigra.VC1973A.gnm6.ann1.Vradi01g08800/vigra.VC1973A.gnm6.ann1…
Molecular function	GO:0030246	carbohydrate binding	0.327411	23	vigra.VC1973A.gnm6.ann1.Vradi06g11570/vigra.VC1973A.gnm6.ann1.Vradi06g13660/vigra.VC1973A.gnm6.ann1.Vradi10g12090/vigra.VC1973A.gnm6.ann1.Vradi06g11540/vigra.VC1973A.gnm6.ann1.Vradi0051s00120/vigra.VC1973A.gnm6.ann1.Vradi03g08400/vigra.VC1973A.gnm6.ann1.Vradi0221s00100/vigra.VC1973A.gnm6.ann1.Vradi08g01790/vigra.VC1973A.gnm6.ann1.Vradi10g05970/novel.1830/novel.1023/vigra.VC1973A.gnm6.ann1.Vradi07…
Molecular function	GO:0005509	calcium ion binding	0.329288	22	vigra.VC1973A.gnm6.ann1.Vradi10g07110/vigra.VC1973A.gnm6.ann1.Vradi05g06170/vigra.VC1973A.gnm6.ann1.Vradi0310s00010/vigra.VC1973A.gnm6.ann1.Vradi05g17450/vigra.VC1973A.gnm6.ann1.Vradi01g02480/vigra.VC1973A.gnm6.ann1.Vradi10g11500/vigra.VC1973A.gnm6.ann1.Vradi0281s00090/vigra.VC1973A.gnm6.ann1.Vradi0179s00280/vigra.VC1973A.gnm6.ann1.Vradi09g05500/vigra.VC1973A.gnm6.ann1.Vradi0189s00020/vigra.VC197…
Molecular function	GO:0050660	flavin adenine dinucleotide binding	0.352522	17	vigra.VC1973A.gnm6.ann1.Vradi09g00400/vigra.VC1973A.gnm6.ann1.Vradi0048s00090/vigra.VC1973A.gnm6.ann1.Vradi07g17300/vigra.VC1973A.gnm6.ann1.Vradi0048s00200/vigra.VC1973A.gnm6.ann1.Vradi0048s00600/vigra.VC1973A.gnm6.ann1.Vradi0048s00560/vigra.VC1973A.gnm6.ann1.Vradi05g13490/vigra.VC1973A.gnm6.ann1.Vradi0048s00410/vigra.VC1973A.gnm6.ann1.Vradi02g14120/vigra.VC1973A.gnm6.ann1.Vradi0048s00220/vigra.V…
Molecular function	GO:0004499	N,N-dimethylaniline monooxygenase activity	0.363059	3	vigra.VC1973A.gnm6.ann1.Vradi07g17300/vigra.VC1973A.gnm6.ann1.Vradi03g09380/novel.1240
Molecular function	GO:0004888	transmembrane signaling receptor activity	0.363059	3	vigra.VC1973A.gnm6.ann1.Vradi05g23300/vigra.VC1973A.gnm6.ann1.Vradi05g23290/novel.1304
Molecular function	GO:0016830	carbon-carbon lyase activity	0.369864	9	vigra.VC1973A.gnm6.ann1.Vradi0393s00080/vigra.VC1973A.gnm6.ann1.Vradi01g05710/vigra.VC1973A.gnm6.ann1.Vradi03g02630/vigra.VC1973A.gnm6.ann1.Vradi0343s00030/vigra.VC1973A.gnm6.ann1.Vradi0389s00050/vigra.VC1973A.gnm6.ann1.Vradi08g06540/vigra.VC1973A.gnm6.ann1.Vradi0236s00040/vigra.VC1973A.gnm6.ann1.Vradi0023s00540/vigra.VC1973A.gnm6.ann1.Vradi0433s00010
Molecular function	GO:0016157	sucrose synthase activity	0.394372	2	vigra.VC1973A.gnm6.ann1.Vradi03g06190/vigra.VC1973A.gnm6.ann1.Vradi05g01720
Molecular function	GO:0016679	oxidoreductase activity, acting on diphenols and related substances as donors	0.394372	2	novel.546/vigra.VC1973A.gnm6.ann1.Vradi11g08000
Molecular function	GO:0016799	hydrolase activity, hydrolyzing N-glycosyl compounds	0.394372	2	vigra.VC1973A.gnm6.ann1.Vradi0129s00030/vigra.VC1973A.gnm6.ann1.Vradi05g18610
Molecular function	GO:0019139	cytokinin dehydrogenase activity	0.394372	2	vigra.VC1973A.gnm6.ann1.Vradi05g13490/vigra.VC1973A.gnm6.ann1.Vradi05g02400
Molecular function	GO:0019899	enzyme binding	0.395827	7	vigra.VC1973A.gnm6.ann1.Vradi09g09490/vigra.VC1973A.gnm6.ann1.Vradi06g04900/vigra.VC1973A.gnm6.ann1.Vradi0083s00830/vigra.VC1973A.gnm6.ann1.Vradi11g07710/vigra.VC1973A.gnm6.ann1.Vradi04g06740/vigra.VC1973A.gnm6.ann1.Vradi0171s00140/vigra.VC1973A.gnm6.ann1.Vradi03g08490
Molecular function	GO:0050661	NADP binding	0.400849	5	vigra.VC1973A.gnm6.ann1.Vradi07g17300/vigra.VC1973A.gnm6.ann1.Vradi09g01700/vigra.VC1973A.gnm6.ann1.Vradi03g09380/novel.1240/vigra.VC1973A.gnm6.ann1.Vradi06g08000
Molecular function	GO:0015103	inorganic anion transmembrane transporter activity	0.434034	4	vigra.VC1973A.gnm6.ann1.Vradi05g07730/vigra.VC1973A.gnm6.ann1.Vradi05g20190/vigra.VC1973A.gnm6.ann1.Vradi01g04240/vigra.VC1973A.gnm6.ann1.Vradi06g07640
Molecular function	GO:0016597	amino acid binding	0.439303	3	vigra.VC1973A.gnm6.ann1.Vradi06g11600/vigra.VC1973A.gnm6.ann1.Vradi08g20360/vigra.VC1973A.gnm6.ann1.Vradi0184s00260
Molecular function	GO:0008509	anion transmembrane transporter activity	0.441939	7	vigra.VC1973A.gnm6.ann1.Vradi0327s00040/vigra.VC1973A.gnm6.ann1.Vradi07g18340/vigra.VC1973A.gnm6.ann1.Vradi05g07730/vigra.VC1973A.gnm6.ann1.Vradi05g20190/vigra.VC1973A.gnm6.ann1.Vradi01g04240/vigra.VC1973A.gnm6.ann1.Vradi05g20010/vigra.VC1973A.gnm6.ann1.Vradi06g07640
Molecular function	GO:0008026	ATP-dependent helicase activity	0.443508	2	novel.44/vigra.VC1973A.gnm6.ann1.Vradi06g16190
Molecular function	GO:0016717	oxidoreductase activity, acting on paired donors, with oxidation of a pair of donors resulting in the reduction of molecular oxygen to two molecules of water	0.443508	2	vigra.VC1973A.gnm6.ann1.Vradi06g11750/vigra.VC1973A.gnm6.ann1.Vradi09g09560
Molecular function	GO:0019829	cation-transporting ATPase activity	0.443508	2	vigra.VC1973A.gnm6.ann1.Vradi01g13100/vigra.VC1973A.gnm6.ann1.Vradi0381s00060
Molecular function	GO:0022853	active ion transmembrane transporter activity	0.443508	2	vigra.VC1973A.gnm6.ann1.Vradi01g13100/vigra.VC1973A.gnm6.ann1.Vradi0381s00060
Molecular function	GO:0042625	ATPase coupled ion transmembrane transporter activity	0.443508	2	vigra.VC1973A.gnm6.ann1.Vradi01g13100/vigra.VC1973A.gnm6.ann1.Vradi0381s00060
Molecular function	GO:0044769	ATPase activity, coupled to transmembrane movement of ions, rotational mechanism	0.443508	2	vigra.VC1973A.gnm6.ann1.Vradi01g13100/vigra.VC1973A.gnm6.ann1.Vradi0381s00060
Molecular function	GO:0046912	transferase activity, transferring acyl groups, acyl groups converted into alkyl on transfer	0.443508	2	vigra.VC1973A.gnm6.ann1.Vradi11g02450/vigra.VC1973A.gnm6.ann1.Vradi06g02080
Molecular function	GO:0070035	purine NTP-dependent helicase activity	0.443508	2	novel.44/vigra.VC1973A.gnm6.ann1.Vradi06g16190
Molecular function	GO:0046527	glucosyltransferase activity	0.44375	13	vigra.VC1973A.gnm6.ann1.Vradi04g04000/vigra.VC1973A.gnm6.ann1.Vradi03g06190/vigra.VC1973A.gnm6.ann1.Vradi10g02700/vigra.VC1973A.gnm6.ann1.Vradi05g01720/vigra.VC1973A.gnm6.ann1.Vradi02g01540/vigra.VC1973A.gnm6.ann1.Vradi02g06230/vigra.VC1973A.gnm6.ann1.Vradi01g11990/vigra.VC1973A.gnm6.ann1.Vradi0450s00100/vigra.VC1973A.gnm6.ann1.Vradi0073s00060/vigra.VC1973A.gnm6.ann1.Vradi03g06310/vigra.VC1973A.g…
Molecular function	GO:0016627	oxidoreductase activity, acting on the CH-CH group of donors	0.465321	4	vigra.VC1973A.gnm6.ann1.Vradi01g12050/vigra.VC1973A.gnm6.ann1.Vradi0149s00060/vigra.VC1973A.gnm6.ann1.Vradi06g00200/vigra.VC1973A.gnm6.ann1.Vradi07g19010
Molecular function	GO:0016160	amylase activity	0.476122	3	vigra.VC1973A.gnm6.ann1.Vradi06g16310/vigra.VC1973A.gnm6.ann1.Vradi09g07620/vigra.VC1973A.gnm6.ann1.Vradi07g12000
Molecular function	GO:0016620	oxidoreductase activity, acting on the aldehyde or oxo group of donors, NAD or NADP as acceptor	0.476122	3	vigra.VC1973A.gnm6.ann1.Vradi02g12080/vigra.VC1973A.gnm6.ann1.Vradi06g08000/vigra.VC1973A.gnm6.ann1.Vradi08g01600
Molecular function	GO:0043531	ADP binding	0.479431	24	vigra.VC1973A.gnm6.ann1.Vradi09g06980/novel.728/novel.95/novel.2763/novel.813/novel.3119/novel.779/vigra.VC1973A.gnm6.ann1.Vradi07g04750/vigra.VC1973A.gnm6.ann1.Vradi0352s00010/novel.910/vigra.VC1973A.gnm6.ann1.Vradi09g06990/vigra.VC1973A.gnm6.ann1.Vradi10g01550/vigra.VC1973A.gnm6.ann1.Vradi05g17310/vigra.VC1973A.gnm6.ann1.Vradi0170s00090/novel.2454/novel.1656/novel.2851/novel.2645/vigra.VC1973A.…
Molecular function	GO:0004175	endopeptidase activity	0.489533	20	vigra.VC1973A.gnm6.ann1.Vradi0500s00020/vigra.VC1973A.gnm6.ann1.Vradi0320s00040/vigra.VC1973A.gnm6.ann1.Vradi08g07280/vigra.VC1973A.gnm6.ann1.Vradi07g23410/novel.2463/novel.858/vigra.VC1973A.gnm6.ann1.Vradi0149s00250/vigra.VC1973A.gnm6.ann1.Vradi1253s00010/vigra.VC1973A.gnm6.ann1.Vradi0436s00030/vigra.VC1973A.gnm6.ann1.Vradi08g19310/vigra.VC1973A.gnm6.ann1.Vradi0122s00080/vigra.VC1973A.gnm6.ann1.…
Molecular function	GO:0004568	chitinase activity	0.490337	2	vigra.VC1973A.gnm6.ann1.Vradi05g15830/vigra.VC1973A.gnm6.ann1.Vradi0656s00030
Molecular function	GO:0016832	aldehyde-lyase activity	0.490337	2	vigra.VC1973A.gnm6.ann1.Vradi0393s00080/vigra.VC1973A.gnm6.ann1.Vradi08g06540
Molecular function	GO:0004497	monooxygenase activity	0.495964	4	vigra.VC1973A.gnm6.ann1.Vradi07g17300/vigra.VC1973A.gnm6.ann1.Vradi10g12410/vigra.VC1973A.gnm6.ann1.Vradi03g09380/novel.1240
Molecular function	GO:0050662	coenzyme binding	0.496955	44	vigra.VC1973A.gnm6.ann1.Vradi05g20560/vigra.VC1973A.gnm6.ann1.Vradi01g00840/vigra.VC1973A.gnm6.ann1.Vradi09g00400/novel.574/novel.1501/vigra.VC1973A.gnm6.ann1.Vradi11g07350/vigra.VC1973A.gnm6.ann1.Vradi10g10250/vigra.VC1973A.gnm6.ann1.Vradi05g08600/vigra.VC1973A.gnm6.ann1.Vradi0048s00090/vigra.VC1973A.gnm6.ann1.Vradi02g08990/vigra.VC1973A.gnm6.ann1.Vradi07g17300/vigra.VC1973A.gnm6.ann1.Vradi0048s…
Molecular function	GO:0015075	ion transmembrane transporter activity	0.509576	33	vigra.VC1973A.gnm6.ann1.Vradi01g13100/vigra.VC1973A.gnm6.ann1.Vradi05g23300/novel.48/vigra.VC1973A.gnm6.ann1.Vradi0327s00040/vigra.VC1973A.gnm6.ann1.Vradi05g23290/vigra.VC1973A.gnm6.ann1.Vradi11g03470/vigra.VC1973A.gnm6.ann1.Vradi04g01890/novel.49/vigra.VC1973A.gnm6.ann1.Vradi11g13190/novel.1477/vigra.VC1973A.gnm6.ann1.Vradi0221s00090/vigra.VC1973A.gnm6.ann1.Vradi07g31300/vigra.VC1973A.gnm6.ann1.…
Molecular function	GO:0005216	ion channel activity	0.509776	7	vigra.VC1973A.gnm6.ann1.Vradi05g23300/vigra.VC1973A.gnm6.ann1.Vradi05g23290/vigra.VC1973A.gnm6.ann1.Vradi06g05710/vigra.VC1973A.gnm6.ann1.Vradi04g02920/novel.90/vigra.VC1973A.gnm6.ann1.Vradi09g03360/novel.1304
Molecular function	GO:0022838	substrate-specific channel activity	0.509776	7	vigra.VC1973A.gnm6.ann1.Vradi05g23300/vigra.VC1973A.gnm6.ann1.Vradi05g23290/vigra.VC1973A.gnm6.ann1.Vradi06g05710/vigra.VC1973A.gnm6.ann1.Vradi04g02920/novel.90/vigra.VC1973A.gnm6.ann1.Vradi09g03360/novel.1304
Molecular function	GO:0005516	calmodulin binding	0.511774	3	vigra.VC1973A.gnm6.ann1.Vradi01g04750/vigra.VC1973A.gnm6.ann1.Vradi07g15800/vigra.VC1973A.gnm6.ann1.Vradi08g12090
Molecular function	GO:0016651	oxidoreductase activity, acting on NAD(P)H	0.511774	3	vigra.VC1973A.gnm6.ann1.Vradi0111s00080/vigra.VC1973A.gnm6.ann1.Vradi05g06080/vigra.VC1973A.gnm6.ann1.Vradi08g12380
Molecular function	GO:0022836	gated channel activity	0.511774	3	vigra.VC1973A.gnm6.ann1.Vradi05g23300/vigra.VC1973A.gnm6.ann1.Vradi05g23290/novel.1304
Molecular function	GO:0022839	ion gated channel activity	0.511774	3	vigra.VC1973A.gnm6.ann1.Vradi05g23300/vigra.VC1973A.gnm6.ann1.Vradi05g23290/novel.1304
Molecular function	GO:0044877	protein-containing complex binding	0.511774	3	vigra.VC1973A.gnm6.ann1.Vradi02g03750/vigra.VC1973A.gnm6.ann1.Vradi11g11270/vigra.VC1973A.gnm6.ann1.Vradi07g10020
Molecular function	GO:0051287	NAD binding	0.522032	6	vigra.VC1973A.gnm6.ann1.Vradi01g00840/vigra.VC1973A.gnm6.ann1.Vradi05g08600/vigra.VC1973A.gnm6.ann1.Vradi05g20670/vigra.VC1973A.gnm6.ann1.Vradi07g28600/vigra.VC1973A.gnm6.ann1.Vradi08g20360/vigra.VC1973A.gnm6.ann1.Vradi0154s00190
Molecular function	GO:0004521	endoribonuclease activity	0.546095	3	vigra.VC1973A.gnm6.ann1.Vradi01g09240/novel.432/vigra.VC1973A.gnm6.ann1.Vradi11g10350
Molecular function	GO:0042578	phosphoric ester hydrolase activity	0.577754	11	vigra.VC1973A.gnm6.ann1.Vradi10g00550/vigra.VC1973A.gnm6.ann1.Vradi07g04050/vigra.VC1973A.gnm6.ann1.Vradi03g04490/vigra.VC1973A.gnm6.ann1.Vradi07g13490/vigra.VC1973A.gnm6.ann1.Vradi04g09370/vigra.VC1973A.gnm6.ann1.Vradi06g04520/vigra.VC1973A.gnm6.ann1.Vradi0100s00640/vigra.VC1973A.gnm6.ann1.Vradi06g01310/vigra.VC1973A.gnm6.ann1.Vradi04g05020/vigra.VC1973A.gnm6.ann1.Vradi03g04480/vigra.VC1973A.gnm…
Molecular function	GO:0008514	organic anion transmembrane transporter activity	0.57896	3	vigra.VC1973A.gnm6.ann1.Vradi0327s00040/vigra.VC1973A.gnm6.ann1.Vradi07g18340/vigra.VC1973A.gnm6.ann1.Vradi05g20010
Molecular function	GO:0016709	oxidoreductase activity, acting on paired donors, with incorporation or reduction of molecular oxygen, NAD(P)H as one donor, and incorporation of one atom of oxygen	0.57896	3	vigra.VC1973A.gnm6.ann1.Vradi07g17300/vigra.VC1973A.gnm6.ann1.Vradi03g09380/novel.1240
Molecular function	GO:0003779	actin binding	0.582818	4	vigra.VC1973A.gnm6.ann1.Vradi07g22430/vigra.VC1973A.gnm6.ann1.Vradi08g11420/vigra.VC1973A.gnm6.ann1.Vradi03g01600/vigra.VC1973A.gnm6.ann1.Vradi08g09960
Molecular function	GO:0004386	helicase activity	0.610954	5	novel.44/vigra.VC1973A.gnm6.ann1.Vradi08g01180/vigra.VC1973A.gnm6.ann1.Vradi0246s00010/vigra.VC1973A.gnm6.ann1.Vradi08g18040/vigra.VC1973A.gnm6.ann1.Vradi06g16190
Molecular function	GO:0016759	cellulose synthase activity	0.610954	5	vigra.VC1973A.gnm6.ann1.Vradi10g02700/vigra.VC1973A.gnm6.ann1.Vradi02g01540/vigra.VC1973A.gnm6.ann1.Vradi01g11990/vigra.VC1973A.gnm6.ann1.Vradi03g06310/vigra.VC1973A.gnm6.ann1.Vradi1089s00010
Molecular function	GO:0016760	cellulose synthase (UDP-forming) activity	0.610954	5	vigra.VC1973A.gnm6.ann1.Vradi10g02700/vigra.VC1973A.gnm6.ann1.Vradi02g01540/vigra.VC1973A.gnm6.ann1.Vradi01g11990/vigra.VC1973A.gnm6.ann1.Vradi03g06310/vigra.VC1973A.gnm6.ann1.Vradi1089s00010
Molecular function	GO:0004871	signal transducer activity	0.61294	6	vigra.VC1973A.gnm6.ann1.Vradi05g23300/vigra.VC1973A.gnm6.ann1.Vradi05g23290/vigra.VC1973A.gnm6.ann1.Vradi02g03750/vigra.VC1973A.gnm6.ann1.Vradi11g11270/vigra.VC1973A.gnm6.ann1.Vradi07g10020/novel.1304
Molecular function	GO:0071949	FAD binding	0.614896	2	vigra.VC1973A.gnm6.ann1.Vradi02g14120/vigra.VC1973A.gnm6.ann1.Vradi02g14130
Molecular function	GO:0015267	channel activity	0.615344	7	vigra.VC1973A.gnm6.ann1.Vradi05g23300/vigra.VC1973A.gnm6.ann1.Vradi05g23290/vigra.VC1973A.gnm6.ann1.Vradi06g05710/vigra.VC1973A.gnm6.ann1.Vradi04g02920/novel.90/vigra.VC1973A.gnm6.ann1.Vradi09g03360/novel.1304
Molecular function	GO:0022803	passive transmembrane transporter activity	0.615344	7	vigra.VC1973A.gnm6.ann1.Vradi05g23300/vigra.VC1973A.gnm6.ann1.Vradi05g23290/vigra.VC1973A.gnm6.ann1.Vradi06g05710/vigra.VC1973A.gnm6.ann1.Vradi04g02920/novel.90/vigra.VC1973A.gnm6.ann1.Vradi09g03360/novel.1304
Molecular function	GO:0019842	vitamin binding	0.623524	10	novel.3517/vigra.VC1973A.gnm6.ann1.Vradi10g10250/vigra.VC1973A.gnm6.ann1.Vradi0305s00100/vigra.VC1973A.gnm6.ann1.Vradi01g05710/vigra.VC1973A.gnm6.ann1.Vradi03g02630/vigra.VC1973A.gnm6.ann1.Vradi11g12350/vigra.VC1973A.gnm6.ann1.Vradi02g10450/vigra.VC1973A.gnm6.ann1.Vradi0343s00030/vigra.VC1973A.gnm6.ann1.Vradi0389s00050/vigra.VC1973A.gnm6.ann1.Vradi04g07090
Molecular function	GO:0015298	solute:cation antiporter activity	0.635633	4	vigra.VC1973A.gnm6.ann1.Vradi07g09000/vigra.VC1973A.gnm6.ann1.Vradi08g12770/vigra.VC1973A.gnm6.ann1.Vradi07g25630/vigra.VC1973A.gnm6.ann1.Vradi10g02350
Molecular function	GO:0015299	solute:proton antiporter activity	0.635633	4	vigra.VC1973A.gnm6.ann1.Vradi07g09000/vigra.VC1973A.gnm6.ann1.Vradi08g12770/vigra.VC1973A.gnm6.ann1.Vradi07g25630/vigra.VC1973A.gnm6.ann1.Vradi10g02350
Molecular function	GO:0008094	DNA-dependent ATPase activity	0.650873	2	vigra.VC1973A.gnm6.ann1.Vradi05g17120/vigra.VC1973A.gnm6.ann1.Vradi06g16190
Molecular function	GO:0004222	metalloendopeptidase activity	0.656431	5	vigra.VC1973A.gnm6.ann1.Vradi0500s00020/vigra.VC1973A.gnm6.ann1.Vradi0320s00040/vigra.VC1973A.gnm6.ann1.Vradi0149s00250/vigra.VC1973A.gnm6.ann1.Vradi1253s00010/vigra.VC1973A.gnm6.ann1.Vradi0436s00030
Molecular function	GO:0010181	FMN binding	0.668082	3	novel.574/vigra.VC1973A.gnm6.ann1.Vradi05g07830/vigra.VC1973A.gnm6.ann1.Vradi04g10740
Molecular function	GO:0060589	nucleoside-triphosphatase regulator activity	0.683907	4	vigra.VC1973A.gnm6.ann1.Vradi0246s00380/vigra.VC1973A.gnm6.ann1.Vradi06g01480/vigra.VC1973A.gnm6.ann1.Vradi01g02850/vigra.VC1973A.gnm6.ann1.Vradi07g26690
Molecular function	GO:0008374	O-acyltransferase activity	0.684119	2	vigra.VC1973A.gnm6.ann1.Vradi06g01110/vigra.VC1973A.gnm6.ann1.Vradi05g12110
Molecular function	GO:0015078	proton transmembrane transporter activity	0.686987	9	vigra.VC1973A.gnm6.ann1.Vradi01g13100/vigra.VC1973A.gnm6.ann1.Vradi11g03470/novel.1477/vigra.VC1973A.gnm6.ann1.Vradi07g09000/vigra.VC1973A.gnm6.ann1.Vradi0381s00060/vigra.VC1973A.gnm6.ann1.Vradi08g12770/vigra.VC1973A.gnm6.ann1.Vradi07g25630/vigra.VC1973A.gnm6.ann1.Vradi10g02350/vigra.VC1973A.gnm6.ann1.Vradi07g07110
Molecular function	GO:0016746	transferase activity, transferring acyl groups	0.690689	24	novel.1469/vigra.VC1973A.gnm6.ann1.Vradi06g01110/novel.1022/vigra.VC1973A.gnm6.ann1.Vradi01g07320/novel.1076/vigra.VC1973A.gnm6.ann1.Vradi01g12170/vigra.VC1973A.gnm6.ann1.Vradi0351s00030/vigra.VC1973A.gnm6.ann1.Vradi07g11190/vigra.VC1973A.gnm6.ann1.Vradi0509s00020/novel.1795/vigra.VC1973A.gnm6.ann1.Vradi0606s00010/vigra.VC1973A.gnm6.ann1.Vradi05g12110/vigra.VC1973A.gnm6.ann1.Vradi01g13000/vigra.V…
Molecular function	GO:0008324	cation transmembrane transporter activity	0.693422	19	vigra.VC1973A.gnm6.ann1.Vradi01g13100/novel.48/vigra.VC1973A.gnm6.ann1.Vradi11g03470/vigra.VC1973A.gnm6.ann1.Vradi04g01890/novel.49/vigra.VC1973A.gnm6.ann1.Vradi11g13190/novel.1477/vigra.VC1973A.gnm6.ann1.Vradi0221s00090/vigra.VC1973A.gnm6.ann1.Vradi07g31300/vigra.VC1973A.gnm6.ann1.Vradi05g18800/vigra.VC1973A.gnm6.ann1.Vradi08g05120/vigra.VC1973A.gnm6.ann1.Vradi07g09000/vigra.VC1973A.gnm6.ann1.Vr…
Molecular function	GO:0016903	oxidoreductase activity, acting on the aldehyde or oxo group of donors	0.69453	3	vigra.VC1973A.gnm6.ann1.Vradi02g12080/vigra.VC1973A.gnm6.ann1.Vradi06g08000/vigra.VC1973A.gnm6.ann1.Vradi08g01600
Molecular function	GO:0004842	ubiquitin-protein transferase activity	0.704335	8	vigra.VC1973A.gnm6.ann1.Vradi08g01140/vigra.VC1973A.gnm6.ann1.Vradi04g11500/vigra.VC1973A.gnm6.ann1.Vradi0091s00190/vigra.VC1973A.gnm6.ann1.Vradi06g06570/vigra.VC1973A.gnm6.ann1.Vradi07g15560/vigra.VC1973A.gnm6.ann1.Vradi02g07300/vigra.VC1973A.gnm6.ann1.Vradi0108s00100/vigra.VC1973A.gnm6.ann1.Vradi0234s00030
Molecular function	GO:0019787	ubiquitin-like protein transferase activity	0.704335	8	vigra.VC1973A.gnm6.ann1.Vradi08g01140/vigra.VC1973A.gnm6.ann1.Vradi04g11500/vigra.VC1973A.gnm6.ann1.Vradi0091s00190/vigra.VC1973A.gnm6.ann1.Vradi06g06570/vigra.VC1973A.gnm6.ann1.Vradi07g15560/vigra.VC1973A.gnm6.ann1.Vradi02g07300/vigra.VC1973A.gnm6.ann1.Vradi0108s00100/vigra.VC1973A.gnm6.ann1.Vradi0234s00030
Molecular function	GO:0030695	GTPase regulator activity	0.71935	3	vigra.VC1973A.gnm6.ann1.Vradi0246s00380/vigra.VC1973A.gnm6.ann1.Vradi01g02850/vigra.VC1973A.gnm6.ann1.Vradi07g26690
Molecular function	GO:0035251	UDP-glucosyltransferase activity	0.723765	7	vigra.VC1973A.gnm6.ann1.Vradi03g06190/vigra.VC1973A.gnm6.ann1.Vradi10g02700/vigra.VC1973A.gnm6.ann1.Vradi05g01720/vigra.VC1973A.gnm6.ann1.Vradi02g01540/vigra.VC1973A.gnm6.ann1.Vradi01g11990/vigra.VC1973A.gnm6.ann1.Vradi03g06310/vigra.VC1973A.gnm6.ann1.Vradi1089s00010
Molecular function	GO:0009055	electron transfer activity	0.725191	13	vigra.VC1973A.gnm6.ann1.Vradi11g03470/novel.1600/vigra.VC1973A.gnm6.ann1.Vradi05g11040/novel.2198/vigra.VC1973A.gnm6.ann1.Vradi06g02940/vigra.VC1973A.gnm6.ann1.Vradi08g10010/vigra.VC1973A.gnm6.ann1.Vradi06g13590/vigra.VC1973A.gnm6.ann1.Vradi0184s00060/novel.2583/vigra.VC1973A.gnm6.ann1.Vradi0253s00150/vigra.VC1973A.gnm6.ann1.Vradi0154s00400/vigra.VC1973A.gnm6.ann1.Vradi01g07600/vigra.VC1973A.gnm6…
Molecular function	GO:0003916	DNA topoisomerase activity	0.761944	1	vigra.VC1973A.gnm6.ann1.Vradi05g17120
Molecular function	GO:0004559	alpha-mannosidase activity	0.761944	1	vigra.VC1973A.gnm6.ann1.Vradi07g01370
Molecular function	GO:0016671	oxidoreductase activity, acting on a sulfur group of donors, disulfide as acceptor	0.761944	1	vigra.VC1973A.gnm6.ann1.Vradi05g03600
Molecular function	GO:0030976	thiamine pyrophosphate binding	0.761944	1	vigra.VC1973A.gnm6.ann1.Vradi10g10250
Molecular function	GO:0000988	transcription factor activity, protein binding	0.764237	3	vigra.VC1973A.gnm6.ann1.Vradi07g02230/vigra.VC1973A.gnm6.ann1.Vradi02g01250/vigra.VC1973A.gnm6.ann1.Vradi06g10780
Molecular function	GO:0004519	endonuclease activity	0.764237	3	vigra.VC1973A.gnm6.ann1.Vradi01g09240/novel.432/vigra.VC1973A.gnm6.ann1.Vradi11g10350
Molecular function	GO:0004540	ribonuclease activity	0.764237	3	vigra.VC1973A.gnm6.ann1.Vradi01g09240/novel.432/vigra.VC1973A.gnm6.ann1.Vradi11g10350
Molecular function	GO:0038023	signaling receptor activity	0.764237	3	vigra.VC1973A.gnm6.ann1.Vradi05g23300/vigra.VC1973A.gnm6.ann1.Vradi05g23290/novel.1304
Molecular function	GO:0060089	molecular transducer activity	0.764237	3	vigra.VC1973A.gnm6.ann1.Vradi05g23300/vigra.VC1973A.gnm6.ann1.Vradi05g23290/novel.1304
Molecular function	GO:0005342	organic acid transmembrane transporter activity	0.76846	2	vigra.VC1973A.gnm6.ann1.Vradi0327s00040/vigra.VC1973A.gnm6.ann1.Vradi07g18340
Molecular function	GO:0015171	amino acid transmembrane transporter activity	0.76846	2	vigra.VC1973A.gnm6.ann1.Vradi0327s00040/vigra.VC1973A.gnm6.ann1.Vradi07g18340
Molecular function	GO:0046943	carboxylic acid transmembrane transporter activity	0.76846	2	vigra.VC1973A.gnm6.ann1.Vradi0327s00040/vigra.VC1973A.gnm6.ann1.Vradi07g18340
Molecular function	GO:0004185	serine-type carboxypeptidase activity	0.771157	5	vigra.VC1973A.gnm6.ann1.Vradi01g08800/vigra.VC1973A.gnm6.ann1.Vradi10g11220/vigra.VC1973A.gnm6.ann1.Vradi07g21400/vigra.VC1973A.gnm6.ann1.Vradi06g09160/vigra.VC1973A.gnm6.ann1.Vradi05g01340
Molecular function	GO:0030170	pyridoxal phosphate binding	0.7833	7	vigra.VC1973A.gnm6.ann1.Vradi0305s00100/vigra.VC1973A.gnm6.ann1.Vradi01g05710/vigra.VC1973A.gnm6.ann1.Vradi03g02630/vigra.VC1973A.gnm6.ann1.Vradi02g10450/vigra.VC1973A.gnm6.ann1.Vradi0343s00030/vigra.VC1973A.gnm6.ann1.Vradi0389s00050/vigra.VC1973A.gnm6.ann1.Vradi04g07090
Molecular function	GO:0070279	vitamin B6 binding	0.7833	7	vigra.VC1973A.gnm6.ann1.Vradi0305s00100/vigra.VC1973A.gnm6.ann1.Vradi01g05710/vigra.VC1973A.gnm6.ann1.Vradi03g02630/vigra.VC1973A.gnm6.ann1.Vradi02g10450/vigra.VC1973A.gnm6.ann1.Vradi0343s00030/vigra.VC1973A.gnm6.ann1.Vradi0389s00050/vigra.VC1973A.gnm6.ann1.Vradi04g07090
Molecular function	GO:0008237	metallopeptidase activity	0.787093	5	vigra.VC1973A.gnm6.ann1.Vradi0500s00020/vigra.VC1973A.gnm6.ann1.Vradi0320s00040/vigra.VC1973A.gnm6.ann1.Vradi0149s00250/vigra.VC1973A.gnm6.ann1.Vradi1253s00010/vigra.VC1973A.gnm6.ann1.Vradi0436s00030
Molecular function	GO:0016645	oxidoreductase activity, acting on the CH-NH group of donors	0.791867	2	vigra.VC1973A.gnm6.ann1.Vradi05g13490/vigra.VC1973A.gnm6.ann1.Vradi05g02400
Molecular function	GO:0005544	calcium-dependent phospholipid binding	0.793788	1	vigra.VC1973A.gnm6.ann1.Vradi05g17450
Molecular function	GO:0016763	transferase activity, transferring pentosyl groups	0.793788	1	vigra.VC1973A.gnm6.ann1.Vradi07g19540
Molecular function	GO:0004180	carboxypeptidase activity	0.802153	5	vigra.VC1973A.gnm6.ann1.Vradi01g08800/vigra.VC1973A.gnm6.ann1.Vradi10g11220/vigra.VC1973A.gnm6.ann1.Vradi07g21400/vigra.VC1973A.gnm6.ann1.Vradi06g09160/vigra.VC1973A.gnm6.ann1.Vradi05g01340
Molecular function	GO:0016747	transferase activity, transferring acyl groups other than amino-acyl groups	0.80219	17	novel.1469/vigra.VC1973A.gnm6.ann1.Vradi06g01110/novel.1022/vigra.VC1973A.gnm6.ann1.Vradi01g07320/novel.1076/vigra.VC1973A.gnm6.ann1.Vradi01g12170/vigra.VC1973A.gnm6.ann1.Vradi07g11190/vigra.VC1973A.gnm6.ann1.Vradi0509s00020/vigra.VC1973A.gnm6.ann1.Vradi05g12110/vigra.VC1973A.gnm6.ann1.Vradi01g13000/vigra.VC1973A.gnm6.ann1.Vradi10g10840/vigra.VC1973A.gnm6.ann1.Vradi01g13010/vigra.VC1973A.gnm6.ann…
Molecular function	GO:0016791	phosphatase activity	0.816357	5	vigra.VC1973A.gnm6.ann1.Vradi10g00550/vigra.VC1973A.gnm6.ann1.Vradi03g04490/vigra.VC1973A.gnm6.ann1.Vradi07g13490/vigra.VC1973A.gnm6.ann1.Vradi0100s00640/vigra.VC1973A.gnm6.ann1.Vradi03g04480
Molecular function	GO:0003678	DNA helicase activity	0.821374	1	vigra.VC1973A.gnm6.ann1.Vradi06g16190
Molecular function	GO:0015923	mannosidase activity	0.821374	1	vigra.VC1973A.gnm6.ann1.Vradi07g01370
Molecular function	GO:0019843	rRNA binding	0.821374	1	novel.1303
Molecular function	GO:0070008	serine-type exopeptidase activity	0.842301	5	vigra.VC1973A.gnm6.ann1.Vradi01g08800/vigra.VC1973A.gnm6.ann1.Vradi10g11220/vigra.VC1973A.gnm6.ann1.Vradi07g21400/vigra.VC1973A.gnm6.ann1.Vradi06g09160/vigra.VC1973A.gnm6.ann1.Vradi05g01340
Molecular function	GO:0016891	endoribonuclease activity, producing 5'-phosphomonoesters	0.865975	1	novel.432
Molecular function	GO:0016893	endonuclease activity, active with either ribo- or deoxyribonucleic acids and producing 5'-phosphomonoesters	0.865975	1	novel.432
Molecular function	GO:1901681	sulfur compound binding	0.865975	1	vigra.VC1973A.gnm6.ann1.Vradi10g10250
Molecular function	GO:0008375	acetylglucosaminyltransferase activity	0.877264	3	vigra.VC1973A.gnm6.ann1.Vradi08g21140/vigra.VC1973A.gnm6.ann1.Vradi07g22500/vigra.VC1973A.gnm6.ann1.Vradi07g27830
Molecular function	GO:0016407	acetyltransferase activity	0.877264	3	vigra.VC1973A.gnm6.ann1.Vradi06g01110/vigra.VC1973A.gnm6.ann1.Vradi07g11190/vigra.VC1973A.gnm6.ann1.Vradi0509s00020
Molecular function	GO:0051082	unfolded protein binding	0.880087	4	vigra.VC1973A.gnm6.ann1.Vradi07g05440/vigra.VC1973A.gnm6.ann1.Vradi01g13880/vigra.VC1973A.gnm6.ann1.Vradi07g18060/novel.3042
Molecular function	GO:0016161	beta-amylase activity	0.883909	1	vigra.VC1973A.gnm6.ann1.Vradi07g12000
Molecular function	GO:0015318	inorganic molecular entity transmembrane transporter activity	0.888328	24	vigra.VC1973A.gnm6.ann1.Vradi01g13100/vigra.VC1973A.gnm6.ann1.Vradi05g23300/vigra.VC1973A.gnm6.ann1.Vradi0327s00040/vigra.VC1973A.gnm6.ann1.Vradi05g23290/vigra.VC1973A.gnm6.ann1.Vradi11g03470/vigra.VC1973A.gnm6.ann1.Vradi04g01890/novel.1477/vigra.VC1973A.gnm6.ann1.Vradi06g05710/vigra.VC1973A.gnm6.ann1.Vradi04g02920/vigra.VC1973A.gnm6.ann1.Vradi07g18340/vigra.VC1973A.gnm6.ann1.Vradi05g07730/novel.…
Molecular function	GO:0008289	lipid binding	0.889168	8	vigra.VC1973A.gnm6.ann1.Vradi05g17450/vigra.VC1973A.gnm6.ann1.Vradi06g09220/vigra.VC1973A.gnm6.ann1.Vradi0183s00060/vigra.VC1973A.gnm6.ann1.Vradi11g08250/vigra.VC1973A.gnm6.ann1.Vradi07g18610/vigra.VC1973A.gnm6.ann1.Vradi0450s00050/vigra.VC1973A.gnm6.ann1.Vradi01g06570/vigra.VC1973A.gnm6.ann1.Vradi08g19030
Molecular function	GO:0015077	monovalent inorganic cation transmembrane transporter activity	0.889522	9	vigra.VC1973A.gnm6.ann1.Vradi01g13100/vigra.VC1973A.gnm6.ann1.Vradi11g03470/novel.1477/vigra.VC1973A.gnm6.ann1.Vradi07g09000/vigra.VC1973A.gnm6.ann1.Vradi0381s00060/vigra.VC1973A.gnm6.ann1.Vradi08g12770/vigra.VC1973A.gnm6.ann1.Vradi07g25630/vigra.VC1973A.gnm6.ann1.Vradi10g02350/vigra.VC1973A.gnm6.ann1.Vradi07g07110
Molecular function	GO:0003743	translation initiation factor activity	0.892924	2	vigra.VC1973A.gnm6.ann1.Vradi02g09360/vigra.VC1973A.gnm6.ann1.Vradi01g11620
Molecular function	GO:0005543	phospholipid binding	0.899192	3	vigra.VC1973A.gnm6.ann1.Vradi05g17450/vigra.VC1973A.gnm6.ann1.Vradi07g18610/vigra.VC1973A.gnm6.ann1.Vradi01g06570
Molecular function	GO:0140097	catalytic activity, acting on DNA	0.908257	4	vigra.VC1973A.gnm6.ann1.Vradi05g17120/vigra.VC1973A.gnm6.ann1.Vradi0129s00030/vigra.VC1973A.gnm6.ann1.Vradi06g16190/vigra.VC1973A.gnm6.ann1.Vradi05g18610
Molecular function	GO:0008194	UDP-glycosyltransferase activity	0.909428	10	vigra.VC1973A.gnm6.ann1.Vradi03g06190/vigra.VC1973A.gnm6.ann1.Vradi10g02700/vigra.VC1973A.gnm6.ann1.Vradi05g01720/vigra.VC1973A.gnm6.ann1.Vradi08g21140/vigra.VC1973A.gnm6.ann1.Vradi02g01540/vigra.VC1973A.gnm6.ann1.Vradi07g22500/vigra.VC1973A.gnm6.ann1.Vradi01g11990/vigra.VC1973A.gnm6.ann1.Vradi03g06310/vigra.VC1973A.gnm6.ann1.Vradi1089s00010/vigra.VC1973A.gnm6.ann1.Vradi07g27830
Molecular function	GO:0016307	phosphatidylinositol phosphate kinase activity	0.912903	1	novel.1970
Molecular function	GO:0045735	nutrient reservoir activity	0.924199	2	vigra.VC1973A.gnm6.ann1.Vradi08g05470/vigra.VC1973A.gnm6.ann1.Vradi09g02490
Molecular function	GO:0016860	intramolecular oxidoreductase activity	0.92456	1	vigra.VC1973A.gnm6.ann1.Vradi05g03600
Molecular function	GO:0008238	exopeptidase activity	0.941671	5	vigra.VC1973A.gnm6.ann1.Vradi01g08800/vigra.VC1973A.gnm6.ann1.Vradi10g11220/vigra.VC1973A.gnm6.ann1.Vradi07g21400/vigra.VC1973A.gnm6.ann1.Vradi06g09160/vigra.VC1973A.gnm6.ann1.Vradi05g01340
Molecular function	GO:0008080	N-acetyltransferase activity	0.946709	2	vigra.VC1973A.gnm6.ann1.Vradi07g11190/vigra.VC1973A.gnm6.ann1.Vradi0509s00020
Molecular function	GO:0051536	iron-sulfur cluster binding	0.947575	4	vigra.VC1973A.gnm6.ann1.Vradi07g03960/novel.1600/vigra.VC1973A.gnm6.ann1.Vradi10g01300/novel.2583
Molecular function	GO:0051540	metal cluster binding	0.947575	4	vigra.VC1973A.gnm6.ann1.Vradi07g03960/novel.1600/vigra.VC1973A.gnm6.ann1.Vradi10g01300/novel.2583
Molecular function	GO:0003690	double-stranded DNA binding	0.950815	3	novel.2925/novel.836/novel.1121
Molecular function	GO:0008135	translation factor activity, RNA binding	0.950815	3	vigra.VC1973A.gnm6.ann1.Vradi08g02750/vigra.VC1973A.gnm6.ann1.Vradi02g09360/vigra.VC1973A.gnm6.ann1.Vradi01g11620
Molecular function	GO:0000989	transcription factor activity, transcription factor binding	0.950983	1	vigra.VC1973A.gnm6.ann1.Vradi07g02230
Molecular function	GO:0003712	transcription cofactor activity	0.950983	1	vigra.VC1973A.gnm6.ann1.Vradi07g02230
Molecular function	GO:0005096	GTPase activator activity	0.950983	1	vigra.VC1973A.gnm6.ann1.Vradi01g02850
Molecular function	GO:0008378	galactosyltransferase activity	0.950983	1	vigra.VC1973A.gnm6.ann1.Vradi07g22140
Molecular function	GO:0034062	5'-3' RNA polymerase activity	0.956773	4	novel.717/novel.1731/vigra.VC1973A.gnm6.ann1.Vradi06g02210/vigra.VC1973A.gnm6.ann1.Vradi01g03920
Molecular function	GO:0097747	RNA polymerase activity	0.956773	4	novel.717/novel.1731/vigra.VC1973A.gnm6.ann1.Vradi06g02210/vigra.VC1973A.gnm6.ann1.Vradi01g03920
Molecular function	GO:0016410	N-acyltransferase activity	0.958005	2	vigra.VC1973A.gnm6.ann1.Vradi07g11190/vigra.VC1973A.gnm6.ann1.Vradi0509s00020
Molecular function	GO:0004812	aminoacyl-tRNA ligase activity	0.960217	3	vigra.VC1973A.gnm6.ann1.Vradi06g13610/vigra.VC1973A.gnm6.ann1.Vradi05g08580/vigra.VC1973A.gnm6.ann1.Vradi09g03900
Molecular function	GO:0016875	ligase activity, forming carbon-oxygen bonds	0.960217	3	vigra.VC1973A.gnm6.ann1.Vradi06g13610/vigra.VC1973A.gnm6.ann1.Vradi05g08580/vigra.VC1973A.gnm6.ann1.Vradi09g03900
Molecular function	GO:0016879	ligase activity, forming carbon-nitrogen bonds	0.968155	1	vigra.VC1973A.gnm6.ann1.Vradi07g02350
Molecular function	GO:0003899	DNA-directed 5'-3' RNA polymerase activity	0.971209	3	novel.1731/vigra.VC1973A.gnm6.ann1.Vradi06g02210/vigra.VC1973A.gnm6.ann1.Vradi01g03920
Molecular function	GO:0019001	guanyl nucleotide binding	0.972407	16	novel.3073/vigra.VC1973A.gnm6.ann1.Vradi01g02470/vigra.VC1973A.gnm6.ann1.Vradi08g02100/vigra.VC1973A.gnm6.ann1.Vradi02g03750/vigra.VC1973A.gnm6.ann1.Vradi09g06260/vigra.VC1973A.gnm6.ann1.Vradi11g11890/vigra.VC1973A.gnm6.ann1.Vradi01g03860/vigra.VC1973A.gnm6.ann1.Vradi11g11270/vigra.VC1973A.gnm6.ann1.Vradi09g01230/novel.1397/vigra.VC1973A.gnm6.ann1.Vradi11g01610/vigra.VC1973A.gnm6.ann1.Vradi07g100…
Molecular function	GO:0003682	chromatin binding	0.97242	1	vigra.VC1973A.gnm6.ann1.Vradi11g06920
Molecular function	GO:0022890	inorganic cation transmembrane transporter activity	0.973235	11	vigra.VC1973A.gnm6.ann1.Vradi01g13100/vigra.VC1973A.gnm6.ann1.Vradi11g03470/vigra.VC1973A.gnm6.ann1.Vradi04g01890/novel.1477/vigra.VC1973A.gnm6.ann1.Vradi07g09000/vigra.VC1973A.gnm6.ann1.Vradi0381s00060/vigra.VC1973A.gnm6.ann1.Vradi08g12770/novel.1571/vigra.VC1973A.gnm6.ann1.Vradi07g25630/vigra.VC1973A.gnm6.ann1.Vradi10g02350/vigra.VC1973A.gnm6.ann1.Vradi07g07110
Molecular function	GO:0070011	peptidase activity, acting on L-amino acid peptides	0.974258	31	vigra.VC1973A.gnm6.ann1.Vradi0500s00020/vigra.VC1973A.gnm6.ann1.Vradi0416s00010/vigra.VC1973A.gnm6.ann1.Vradi0320s00040/novel.701/vigra.VC1973A.gnm6.ann1.Vradi08g07280/vigra.VC1973A.gnm6.ann1.Vradi07g23410/novel.2463/novel.858/vigra.VC1973A.gnm6.ann1.Vradi0149s00250/vigra.VC1973A.gnm6.ann1.Vradi1253s00010/vigra.VC1973A.gnm6.ann1.Vradi0436s00030/vigra.VC1973A.gnm6.ann1.Vradi08g19310/vigra.VC1973A.…
Molecular function	GO:0008047	enzyme activator activity	0.976114	1	vigra.VC1973A.gnm6.ann1.Vradi01g02850
Molecular function	GO:0008233	peptidase activity	0.977073	32	vigra.VC1973A.gnm6.ann1.Vradi0500s00020/vigra.VC1973A.gnm6.ann1.Vradi0416s00010/vigra.VC1973A.gnm6.ann1.Vradi0320s00040/novel.701/vigra.VC1973A.gnm6.ann1.Vradi08g07280/vigra.VC1973A.gnm6.ann1.Vradi07g23410/novel.2463/novel.858/vigra.VC1973A.gnm6.ann1.Vradi0149s00250/vigra.VC1973A.gnm6.ann1.Vradi1253s00010/vigra.VC1973A.gnm6.ann1.Vradi0436s00030/vigra.VC1973A.gnm6.ann1.Vradi08g19310/vigra.VC1973A.…
Molecular function	GO:0015035	protein disulfide oxidoreductase activity	0.97708	2	vigra.VC1973A.gnm6.ann1.Vradi08g10010/vigra.VC1973A.gnm6.ann1.Vradi0154s00400
Molecular function	GO:0008234	cysteine-type peptidase activity	0.979651	6	vigra.VC1973A.gnm6.ann1.Vradi0416s00010/novel.701/vigra.VC1973A.gnm6.ann1.Vradi08g03150/vigra.VC1973A.gnm6.ann1.Vradi05g02000/vigra.VC1973A.gnm6.ann1.Vradi0161s00130/vigra.VC1973A.gnm6.ann1.Vradi05g12560
Molecular function	GO:0003755	peptidyl-prolyl cis-trans isomerase activity	0.982085	1	vigra.VC1973A.gnm6.ann1.Vradi05g15430
Molecular function	GO:0016810	hydrolase activity, acting on carbon-nitrogen (but not peptide) bonds	0.982085	1	vigra.VC1973A.gnm6.ann1.Vradi09g09800
Molecular function	GO:0016859	cis-trans isomerase activity	0.982085	1	vigra.VC1973A.gnm6.ann1.Vradi05g15430
Molecular function	GO:0015036	disulfide oxidoreductase activity	0.986003	2	vigra.VC1973A.gnm6.ann1.Vradi08g10010/vigra.VC1973A.gnm6.ann1.Vradi0154s00400
Molecular function	GO:0016853	isomerase activity	0.986069	9	novel.133/vigra.VC1973A.gnm6.ann1.Vradi05g03600/novel.2424/vigra.VC1973A.gnm6.ann1.Vradi0190s00080/novel.2591/novel.891/vigra.VC1973A.gnm6.ann1.Vradi05g17120/vigra.VC1973A.gnm6.ann1.Vradi05g15430/vigra.VC1973A.gnm6.ann1.Vradi0083s00850
Molecular function	GO:0016667	oxidoreductase activity, acting on a sulfur group of donors	0.986742	3	vigra.VC1973A.gnm6.ann1.Vradi05g03600/vigra.VC1973A.gnm6.ann1.Vradi08g10010/vigra.VC1973A.gnm6.ann1.Vradi0154s00400
Molecular function	GO:0016866	intramolecular transferase activity	0.991274	1	vigra.VC1973A.gnm6.ann1.Vradi0190s00080
Molecular function	GO:0140101	catalytic activity, acting on a tRNA	0.992427	4	vigra.VC1973A.gnm6.ann1.Vradi06g13610/vigra.VC1973A.gnm6.ann1.Vradi05g08580/vigra.VC1973A.gnm6.ann1.Vradi09g03900/vigra.VC1973A.gnm6.ann1.Vradi06g08000
Molecular function	GO:0001883	purine nucleoside binding	0.993325	13	novel.3073/vigra.VC1973A.gnm6.ann1.Vradi01g02470/vigra.VC1973A.gnm6.ann1.Vradi08g02100/vigra.VC1973A.gnm6.ann1.Vradi09g06260/vigra.VC1973A.gnm6.ann1.Vradi11g11890/vigra.VC1973A.gnm6.ann1.Vradi01g03860/vigra.VC1973A.gnm6.ann1.Vradi09g01230/novel.1397/vigra.VC1973A.gnm6.ann1.Vradi11g01610/vigra.VC1973A.gnm6.ann1.Vradi07g19900/vigra.VC1973A.gnm6.ann1.Vradi07g11870/vigra.VC1973A.gnm6.ann1.Vradi0179s0…
Molecular function	GO:0005525	GTP binding	0.993325	13	novel.3073/vigra.VC1973A.gnm6.ann1.Vradi01g02470/vigra.VC1973A.gnm6.ann1.Vradi08g02100/vigra.VC1973A.gnm6.ann1.Vradi09g06260/vigra.VC1973A.gnm6.ann1.Vradi11g11890/vigra.VC1973A.gnm6.ann1.Vradi01g03860/vigra.VC1973A.gnm6.ann1.Vradi09g01230/novel.1397/vigra.VC1973A.gnm6.ann1.Vradi11g01610/vigra.VC1973A.gnm6.ann1.Vradi07g19900/vigra.VC1973A.gnm6.ann1.Vradi07g11870/vigra.VC1973A.gnm6.ann1.Vradi0179s0…
Molecular function	GO:0032549	ribonucleoside binding	0.993325	13	novel.3073/vigra.VC1973A.gnm6.ann1.Vradi01g02470/vigra.VC1973A.gnm6.ann1.Vradi08g02100/vigra.VC1973A.gnm6.ann1.Vradi09g06260/vigra.VC1973A.gnm6.ann1.Vradi11g11890/vigra.VC1973A.gnm6.ann1.Vradi01g03860/vigra.VC1973A.gnm6.ann1.Vradi09g01230/novel.1397/vigra.VC1973A.gnm6.ann1.Vradi11g01610/vigra.VC1973A.gnm6.ann1.Vradi07g19900/vigra.VC1973A.gnm6.ann1.Vradi07g11870/vigra.VC1973A.gnm6.ann1.Vradi0179s0…
Molecular function	GO:0032550	purine ribonucleoside binding	0.993325	13	novel.3073/vigra.VC1973A.gnm6.ann1.Vradi01g02470/vigra.VC1973A.gnm6.ann1.Vradi08g02100/vigra.VC1973A.gnm6.ann1.Vradi09g06260/vigra.VC1973A.gnm6.ann1.Vradi11g11890/vigra.VC1973A.gnm6.ann1.Vradi01g03860/vigra.VC1973A.gnm6.ann1.Vradi09g01230/novel.1397/vigra.VC1973A.gnm6.ann1.Vradi11g01610/vigra.VC1973A.gnm6.ann1.Vradi07g19900/vigra.VC1973A.gnm6.ann1.Vradi07g11870/vigra.VC1973A.gnm6.ann1.Vradi0179s0…
Molecular function	GO:0032561	guanyl ribonucleotide binding	0.993325	13	novel.3073/vigra.VC1973A.gnm6.ann1.Vradi01g02470/vigra.VC1973A.gnm6.ann1.Vradi08g02100/vigra.VC1973A.gnm6.ann1.Vradi09g06260/vigra.VC1973A.gnm6.ann1.Vradi11g11890/vigra.VC1973A.gnm6.ann1.Vradi01g03860/vigra.VC1973A.gnm6.ann1.Vradi09g01230/novel.1397/vigra.VC1973A.gnm6.ann1.Vradi11g01610/vigra.VC1973A.gnm6.ann1.Vradi07g19900/vigra.VC1973A.gnm6.ann1.Vradi07g11870/vigra.VC1973A.gnm6.ann1.Vradi0179s0…
Molecular function	GO:0001882	nucleoside binding	0.993816	13	novel.3073/vigra.VC1973A.gnm6.ann1.Vradi01g02470/vigra.VC1973A.gnm6.ann1.Vradi08g02100/vigra.VC1973A.gnm6.ann1.Vradi09g06260/vigra.VC1973A.gnm6.ann1.Vradi11g11890/vigra.VC1973A.gnm6.ann1.Vradi01g03860/vigra.VC1973A.gnm6.ann1.Vradi09g01230/novel.1397/vigra.VC1973A.gnm6.ann1.Vradi11g01610/vigra.VC1973A.gnm6.ann1.Vradi07g19900/vigra.VC1973A.gnm6.ann1.Vradi07g11870/vigra.VC1973A.gnm6.ann1.Vradi0179s0…
Molecular function	GO:0016874	ligase activity	0.995212	5	novel.2058/vigra.VC1973A.gnm6.ann1.Vradi06g13610/vigra.VC1973A.gnm6.ann1.Vradi07g02350/vigra.VC1973A.gnm6.ann1.Vradi05g08580/vigra.VC1973A.gnm6.ann1.Vradi09g03900
Molecular function	GO:0140098	catalytic activity, acting on RNA	0.996441	12	novel.44/novel.717/vigra.VC1973A.gnm6.ann1.Vradi01g09240/novel.1731/novel.432/vigra.VC1973A.gnm6.ann1.Vradi06g02210/vigra.VC1973A.gnm6.ann1.Vradi06g13610/vigra.VC1973A.gnm6.ann1.Vradi11g10350/vigra.VC1973A.gnm6.ann1.Vradi05g08580/vigra.VC1973A.gnm6.ann1.Vradi09g03900/vigra.VC1973A.gnm6.ann1.Vradi06g08000/vigra.VC1973A.gnm6.ann1.Vradi01g03920
Molecular function	GO:0046873	metal ion transmembrane transporter activity	0.997294	2	vigra.VC1973A.gnm6.ann1.Vradi04g01890/novel.1571
Molecular function	GO:0016741	transferase activity, transferring one-carbon groups	0.997932	15	vigra.VC1973A.gnm6.ann1.Vradi0267s00040/novel.1781/novel.2796/vigra.VC1973A.gnm6.ann1.Vradi0154s00040/novel.1179/vigra.VC1973A.gnm6.ann1.Vradi05g00320/vigra.VC1973A.gnm6.ann1.Vradi04g07450/novel.816/novel.438/vigra.VC1973A.gnm6.ann1.Vradi11g03080/vigra.VC1973A.gnm6.ann1.Vradi01g14690/novel.1210/vigra.VC1973A.gnm6.ann1.Vradi0184s00080/vigra.VC1973A.gnm6.ann1.Vradi06g12360/novel.1475
Molecular function	GO:0008168	methyltransferase activity	0.998097	14	vigra.VC1973A.gnm6.ann1.Vradi0267s00040/novel.1781/novel.2796/vigra.VC1973A.gnm6.ann1.Vradi0154s00040/novel.1179/vigra.VC1973A.gnm6.ann1.Vradi05g00320/vigra.VC1973A.gnm6.ann1.Vradi04g07450/novel.816/novel.438/vigra.VC1973A.gnm6.ann1.Vradi01g14690/novel.1210/vigra.VC1973A.gnm6.ann1.Vradi0184s00080/vigra.VC1973A.gnm6.ann1.Vradi06g12360/novel.1475
Molecular function	GO:0004518	nuclease activity	0.998371	3	vigra.VC1973A.gnm6.ann1.Vradi01g09240/novel.432/vigra.VC1973A.gnm6.ann1.Vradi11g10350
Molecular function	GO:0016779	nucleotidyltransferase activity	0.999368	5	novel.717/novel.1731/vigra.VC1973A.gnm6.ann1.Vradi06g02210/vigra.VC1973A.gnm6.ann1.Vradi07g27270/vigra.VC1973A.gnm6.ann1.Vradi01g03920
Molecular function	GO:0003723	RNA binding	0.999999	13	novel.44/vigra.VC1973A.gnm6.ann1.Vradi04g05200/vigra.VC1973A.gnm6.ann1.Vradi08g02750/novel.2796/vigra.VC1973A.gnm6.ann1.Vradi01g09240/vigra.VC1973A.gnm6.ann1.Vradi10g04030/vigra.VC1973A.gnm6.ann1.Vradi0007s00540/vigra.VC1973A.gnm6.ann1.Vradi02g09360/vigra.VC1973A.gnm6.ann1.Vradi01g11620/vigra.VC1973A.gnm6.ann1.Vradi11g10350/vigra.VC1973A.gnm6.ann1.Vradi03g03980/novel.1303/novel.2134
Molecular function	GO:0005198	structural molecule activity	1	9	novel.1541/novel.2647/novel.156/novel.1371/novel.2248/vigra.VC1973A.gnm6.ann1.Vradi04g02300/novel.1303/novel.2536/novel.1690
Molecular function	GO:0003735	structural constituent of ribosome	1	8	novel.1541/novel.2647/novel.1371/novel.2248/vigra.VC1973A.gnm6.ann1.Vradi04g02300/novel.1303/novel.2536/novel.1690

## Sheet: Supplementary Table 7
Supplementary Table 7 KEGG pathway enrichment analysis of 3254 DEGs.
ID	Term	Count	p-value	Gene ID
gmx01100	Metabolic pathways	394	1.7773e-22	Vradi03g04110|Vradi0212s00070|Vradi07g03960|novel.662|Vradi04g05350|Vradi0442s00020|Vradi01g12290|Vradi11g02530|novel.816|Vradi0183s00250|novel.3515|Vradi04g07090|Vradi06g04560|Vradi01g00090|Vradi07g01230|Vradi05g04480|novel.343|Vradi0351s00030|Vradi11g12640|Vradi06g12490|Vradi11g08340|Vradi02g09600|Vradi0381s00060|novel.2333|Vradi07g28720|Vradi11g02450|Vradi0656s00030|Vradi07g01600|novel.3224|no…
gmx01110	Biosynthesis of secondary metabolites	230	4.48304e-19	novel.2011|Vradi03g04110|Vradi0212s00070|Vradi0389s00050|Vradi05g08760|Vradi02g02520|Vradi07g07740|Vradi10g05710|Vradi01g12290|Vradi03g02630|Vradi11g02530|novel.133|Vradi0100s00460|Vradi11g07350|Vradi10g07520|Vradi08g03870|novel.816|Vradi0007s00340|Vradi02g13960|Vradi0305s00040|Vradi07g24460|Vradi04g07090|Vradi06g04560|Vradi08g10940|Vradi01g00090|novel.1144|Vradi0043s00720|novel.343|Vradi0351s000…
gmx00940	Phenylpropanoid biosynthesis	51	9.49362e-09	Vradi0212s00070|novel.565|Vradi02g02360|Vradi01g04180|Vradi11g05400|Vradi0048s00190|Vradi03g05550|Vradi0100s00460|Vradi08g21470|Vradi10g00130|novel.2244|Vradi09g06540|Vradi02g13960|Vradi0305s00040|Vradi07g24460|Vradi01g07070|novel.2028|Vradi0007s00360|Vradi05g01310|Vradi10g08240|Vradi01g11800|Vradi06g06600|Vradi06g06580|Vradi05g18620|Vradi0332s00030|Vradi02g02370|Vradi0048s00600|novel.516|Vradi00…
gmx00500	Starch and sucrose metabolism	39	5.81106e-06	Vradi05g01720|Vradi02g00540|Vradi06g12490|Vradi01g01770|Vradi07g27270|Vradi03g06190|Vradi08g10400|Vradi04g08810|Vradi07g16910|Vradi05g07380|Vradi0635s00020|Vradi07g26990|Vradi10g08240|Vradi05g21070|Vradi05g22180|Vradi09g07620|Vradi05g09630|Vradi07g29600|Vradi07g12720|Vradi10g08230|Vradi11g01590|Vradi02g04050|Vradi05g03980|Vradi03g06180|Vradi10g03320|Vradi01g05010|Vradi03g07910|Vradi0183s00080|nov…
gmx00071	Fatty acid degradation	17	0.000161092	Vradi02g04470|Vradi07g19010|Vradi06g11760|Vradi08g00700|Vradi11g11240|Vradi09g09780|Vradi05g06710|Vradi0051s00190|Vradi0183s00250|Vradi0149s00060|Vradi0442s00020|Vradi06g06960|Vradi10g01590|Vradi02g01390|Vradi07g26380|novel.2011|Vradi10g03420
gmx00909	Sesquiterpenoid and triterpenoid biosynthesis	8	0.000271284	novel.426|novel.425|novel.526|novel.1033|novel.1394|novel.3253|Vradi0421s00070|Vradi01g02950
gmx00520	Amino sugar and nucleotide sugar metabolism	30	0.000312236	Vradi0656s00030|novel.2269|Vradi07g27270|Vradi05g15830|Vradi07g07300|Vradi03g06310|Vradi0194s00080|Vradi10g05650|Vradi0083s00220|Vradi09g03310|Vradi02g11570|Vradi05g18560|Vradi10g12630|Vradi02g11490|Vradi07g26270|Vradi11g01590|Vradi02g04050|Vradi0190s00080|Vradi0007s02480|Vradi01g13210|Vradi08g08950|Vradi01g07780|novel.1978|Vradi0209s00110|Vradi04g02200|Vradi03g06060|Vradi11g10440|Vradi08g19990|V…
gmx00640	Propanoate metabolism	13	0.000344154	Vradi07g19010|novel.2058|novel.103|Vradi01g07460|Vradi07g26380|Vradi07g12670|Vradi07g24760|novel.303|Vradi11g02830|Vradi0275s00040|Vradi0149s00060|Vradi07g14010|Vradi01g07390
gmx00196	Photosynthesis - antenna proteins	9	0.000373413	Vradi01g09260|novel.937|Vradi09g09820|Vradi06g00580|Vradi03g10310|Vradi0170s00030|Vradi10g12540|Vradi02g10630|Vradi01g06710
gmx01200	Carbon metabolism	48	0.000429333	Vradi03g04110|novel.2058|Vradi08g20360|Vradi07g12730|Vradi07g01800|Vradi0023s00540|Vradi08g06540|Vradi07g28810|Vradi05g20770|Vradi0236s00040|Vradi08g18320|Vradi0433s00010|Vradi07g28600|Vradi08g16180|Vradi07g24760|Vradi05g18990|Vradi07g11820|Vradi0149s00060|Vradi0305s00100|Vradi01g00840|Vradi01g00090|novel.303|Vradi05g08600|Vradi02g12080|Vradi01g07390|Vradi06g08180|Vradi07g19010|Vradi01g06780|Vrad…
gmx00130	Ubiquinone and other terpenoid-quinone biosynthesis	15	0.00062296	novel.816|Vradi08g05740|Vradi08g05640|Vradi02g10450|Vradi11g08340|Vradi0073s00420|Vradi0206s00050|novel.2281|Vradi08g05750|Vradi0387s00040|Vradi08g21470|Vradi08g05710|Vradi06g06930|Vradi10g05760|Vradi08g05700
gmx00040	Pentose and glucuronate interconversions	25	0.000706988	Vradi05g17010|Vradi10g07930|Vradi05g05860|Vradi05g21610|Vradi11g00490|Vradi01g00610|Vradi08g04030|Vradi07g27870|Vradi09g09290|Vradi03g06170|Vradi03g03780|Vradi0289s00030|Vradi09g09280|Vradi01g08290|Vradi10g07940|Vradi0171s00250|Vradi02g12280|Vradi11g09680|Vradi07g14590|Vradi04g01380|Vradi0289s00090|Vradi07g28720|Vradi05g00150|novel.2670|Vradi08g12270
gmx00010	Glycolysis / Gluconeogenesis	28	0.0017286	Vradi03g04110|Vradi11g02830|Vradi07g12670|Vradi10g07790|Vradi08g06540|Vradi07g28810|Vradi05g20770|Vradi08g18320|Vradi0433s00010|Vradi08g16180|Vradi06g11760|Vradi0083s00850|Vradi0183s00250|Vradi01g00090|Vradi10g10250|Vradi02g12080|Vradi02g04470|novel.2670|Vradi01g06780|Vradi11g01590|Vradi05g18920|Vradi02g01390|Vradi09g09780|Vradi0051s00190|Vradi07g24760|Vradi10g01590|Vradi0393s00080|Vradi07g21240
gmx00350	Tyrosine metabolism	13	0.00233493	novel.3224|Vradi09g09780|Vradi0051s00190|Vradi0183s00250|Vradi02g10450|novel.3223|Vradi0305s00100|Vradi03g02630|Vradi10g01590|Vradi02g01390|novel.546|Vradi06g11760|novel.3219
gmx04626	Plant-pathogen interaction	28	0.00315561	Vradi08g12380|Vradi04g05110|Vradi10g11830|Vradi10g07710|novel.2553|Vradi05g06170|Vradi01g03450|Vradi0352s00010|Vradi04g02920|Vradi04g07100|Vradi01g13880|novel.90|Vradi07g17920|Vradi08g02390|novel.2730|Vradi0158s00480|Vradi10g11840|Vradi06g03490|Vradi01g02480|Vradi0170s00090|Vradi07g15290|novel.3422|Vradi09g04070|Vradi11g08390|Vradi05g06080|Vradi09g03360|novel.460|novel.542
gmx01230	Biosynthesis of amino acids	39	0.00384456	Vradi08g12900|Vradi03g04110|Vradi08g20360|Vradi07g12730|Vradi08g18320|Vradi08g06540|Vradi07g28810|Vradi05g20770|Vradi01g09410|Vradi07g01800|Vradi07g16190|Vradi11g03850|Vradi08g16180|Vradi09g09060|novel.931|Vradi10g05180|Vradi07g11820|Vradi0007s01300|Vradi0305s00100|Vradi08g13530|Vradi01g00090|Vradi0043s00720|novel.343|Vradi02g12080|Vradi06g08180|Vradi01g06780|Vradi08g15420|Vradi02g10450|Vradi06g0…
gmx01212	Fatty acid metabolism	16	0.00413423	Vradi07g19010|Vradi0149s00060|Vradi04g00920|Vradi11g11240|Vradi05g06710|Vradi11g09410|novel.2058|Vradi02g05110|Vradi0442s00020|Vradi06g07280|Vradi07g26380|Vradi02g12240|Vradi06g11750|Vradi01g07460|novel.2011|Vradi01g07390
gmx00410	beta-Alanine metabolism	14	0.00522989	Vradi02g04470|Vradi07g19010|Vradi0149s00060|novel.103|novel.3224|novel.3223|Vradi01g05710|Vradi07g14910|Vradi0343s00030|novel.303|Vradi05g17060|Vradi0389s00050|Vradi07g14010|novel.3219
gmx00910	Nitrogen metabolism	10	0.00640324	Vradi03g03790|Vradi0453s00010|Vradi07g03960|Vradi05g04090|Vradi08g17900|novel.2603|Vradi06g11170|Vradi02g06110|Vradi10g01300|Vradi05g07060
gmx00906	Carotenoid biosynthesis	10	0.00702908	Vradi02g14130|novel.1600|Vradi07g02700|Vradi02g14120|Vradi05g08760|Vradi03g01160|Vradi04g04580|Vradi01g13760|Vradi0425s00010|Vradi05g18970
gmx00270	Cysteine and methionine metabolism	22	0.00707808	novel.1609|novel.1608|Vradi08g20360|Vradi07g12670|Vradi01g09410|novel.931|Vradi0007s01300|Vradi04g07090|Vradi0305s00100|Vradi11g03850|novel.229|Vradi11g06920|Vradi08g11720|Vradi02g10450|Vradi07g01810|Vradi11g02830|novel.343|novel.2219|novel.920|Vradi07g01820|Vradi07g14910|Vradi06g01110
gmx00591	Linoleic acid metabolism	8	0.00937379	novel.2718|novel.2722|Vradi05g00060|Vradi01g03050|novel.497|Vradi0315s00160|novel.1115|Vradi0154s00310
gmx00900	Terpenoid backbone biosynthesis	12	0.010221	novel.1445|novel.1876|Vradi07g26380|Vradi02g03550|Vradi04g02770|Vradi01g12290|Vradi10g07150|Vradi11g02450|Vradi07g07740|novel.2995|Vradi11g07350|Vradi11g05370
gmx00650	Butanoate metabolism	7	0.0104891	Vradi07g26380|Vradi06g02920|Vradi01g05710|Vradi0343s00030|novel.2995|Vradi11g02450|Vradi0389s00050
gmx00941	Flavonoid biosynthesis	12	0.0109818	Vradi11g02530|Vradi10g00130|Vradi0007s00340|novel.662|Vradi06g16000|Vradi10g05710|Vradi07g01230|Vradi07g08690|Vradi08g21470|Vradi0209s00010|novel.2424|novel.2591
gmx00620	Pyruvate metabolism	19	0.011009	Vradi02g04470|Vradi03g04110|novel.3004|Vradi07g24760|Vradi01g07460|novel.2058|Vradi0433s00010|Vradi05g20670|Vradi07g12670|Vradi0023s00540|Vradi08g16180|Vradi01g00090|Vradi0236s00040|Vradi11g02830|Vradi07g26380|Vradi05g08600|Vradi07g28600|Vradi08g18320|Vradi01g07390
gmx00592	alpha-Linolenic acid metabolism	12	0.0135276	Vradi07g19010|Vradi01g01010|novel.574|Vradi0051s00190|Vradi0183s00250|Vradi0149s00060|novel.133|Vradi05g00060|Vradi01g03050|Vradi06g11760|novel.2011|Vradi0154s00310
gmx00280	Valine, leucine and isoleucine degradation	12	0.0135276	Vradi02g04470|Vradi07g24760|novel.103|novel.2995|Vradi06g02920|Vradi11g03850|Vradi11g02450|novel.303|Vradi07g26380|Vradi0275s00040|novel.343|Vradi07g14010
gmx00072	Synthesis and degradation of ketone bodies	4	0.0135437	Vradi06g02920|novel.2995|Vradi11g02450|Vradi07g26380
gmx00460	Cyanoamino acid metabolism	11	0.0153963	Vradi06g08180|Vradi03g06920|Vradi09g00400|novel.749|Vradi02g13720|novel.2333|Vradi10g08230|Vradi10g08240|Vradi02g04240|novel.1013|Vradi01g05010
gmx00430	Taurine and hypotaurine metabolism	6	0.0164565	Vradi04g08570|Vradi0187s00010|Vradi01g05710|Vradi0007s01550|Vradi0343s00030|Vradi0389s00050
gmx00950	Isoquinoline alkaloid biosynthesis	7	0.0219172	Vradi02g10450|novel.3224|novel.3223|Vradi0305s00100|Vradi03g02630|novel.546|novel.3219
gmx00062	Fatty acid elongation	7	0.028763	Vradi10g10840|Vradi11g09410|Vradi02g05110|Vradi08g00150|novel.1022|Vradi07g19840|Vradi02g12240
gmx01040	Biosynthesis of unsaturated fatty acids	6	0.0314065	Vradi07g19010|Vradi11g09410|Vradi0149s00060|Vradi02g05110|Vradi02g12240|Vradi06g11750
gmx00511	Other glycan degradation	5	0.0409834	Vradi07g01370|Vradi08g20290|Vradi06g04180|Vradi07g27370|Vradi05g18560
gmx00590	Arachidonic acid metabolism	5	0.0409834	Vradi11g02190|Vradi07g03590|Vradi01g03050|Vradi08g09640|Vradi0154s00310
gmx00943	Isoflavonoid biosynthesis	6	0.0414076	Vradi01g08950|novel.438|Vradi06g07980|novel.1179|novel.2778|novel.2779
gmx04016	MAPK signaling pathway - plant	24	0.0453341	Vradi08g12380|Vradi11g01700|Vradi10g11830|Vradi05g15830|Vradi03g01560|Vradi03g08350|Vradi07g30480|novel.2240|Vradi04g07090|Vradi04g07100|Vradi10g10110|novel.2730|Vradi05g02240|Vradi07g20250|Vradi0158s00480|Vradi10g11840|Vradi07g23100|Vradi02g07090|novel.460|Vradi09g04070|Vradi03g01580|Vradi05g06080|novel.352|Vradi09g07010
gmx00960	Tropane, piperidine and pyridine alkaloid biosynthesis	6	0.0490727	Vradi02g10450|novel.3224|novel.3223|Vradi0305s00100|novel.836|novel.3219
gmx00061	Fatty acid biosynthesis	9	0.0537413	Vradi04g00920|Vradi11g11240|Vradi05g06710|novel.2058|Vradi0442s00020|Vradi06g07280|Vradi06g11750|Vradi01g07460|Vradi01g07390
gmx04145	Phagosome	15	0.0565754	Vradi06g16470|Vradi01g03860|Vradi09g07240|Vradi07g28290|Vradi07g11590|novel.3042|Vradi07g30530|Vradi05g13910|novel.1477|Vradi07g07110|Vradi01g10600|Vradi03g03480|Vradi11g03780|Vradi08g19840|Vradi09g01230
gmx00260	Glycine, serine and threonine metabolism	11	0.0646924	Vradi06g08180|Vradi07g24760|Vradi08g20360|Vradi03g06920|Vradi07g01820|novel.3224|novel.3223|Vradi01g09410|Vradi08g13530|Vradi01g07920|novel.3219
gmx00710	Carbon fixation in photosynthetic organisms	12	0.0686058	Vradi0433s00010|Vradi05g20670|Vradi0023s00540|Vradi0305s00100|Vradi08g06540|Vradi11g08360|Vradi0236s00040|Vradi05g08600|Vradi05g18920|Vradi0393s00080|Vradi07g28600|Vradi02g12080
gmx00561	Glycerolipid metabolism	14	0.0770216	Vradi02g04470|Vradi02g03520|Vradi11g12640|novel.2670|novel.1795|Vradi04g05350|Vradi07g20700|Vradi02g10620|Vradi01g08520|Vradi09g04440|Vradi05g02330|Vradi04g01700|Vradi0351s00030|Vradi0154s00310
gmx00902	Monoterpenoid biosynthesis	3	0.0776134	Vradi09g04860|novel.1144|Vradi11g09220
gmx00564	Glycerophospholipid metabolism	16	0.0776767	Vradi09g04440|Vradi04g05020|Vradi05g05460|Vradi05g12110|novel.1795|Vradi05g19950|Vradi02g03520|Vradi02g10620|Vradi01g03050|Vradi05g20910|Vradi0154s00190|Vradi04g01700|Vradi09g00910|Vradi0351s00030|Vradi07g00240|Vradi0154s00310
gmx00920	Sulfur metabolism	7	0.079101	Vradi01g08270|Vradi10g11530|Vradi07g01810|Vradi06g01110|Vradi07g15880|Vradi0246s00330|Vradi10g11340
gmx00965	Betalain biosynthesis	2	0.079774	Vradi01g06480|Vradi03g02630
gmx00360	Phenylalanine metabolism	6	0.0823589	novel.3224|Vradi02g10450|novel.3223|Vradi0305s00100|Vradi03g02630|novel.3219
gmx00904	Diterpenoid biosynthesis	6	0.105849	novel.1527|Vradi10g09340|Vradi07g24380|Vradi01g07020|Vradi03g00870|Vradi08g10940
gmx00944	Flavone and flavonol biosynthesis	3	0.109829	Vradi0023s00080|Vradi10g02330|Vradi10g05710
gmx00730	Thiamine metabolism	5	0.111413	Vradi02g09350|Vradi06g08450|Vradi0450s00010|Vradi07g07740|Vradi08g08040
gmx00030	Pentose phosphate pathway	10	0.11713	Vradi09g01700|Vradi07g11820|Vradi07g12730|Vradi10g07790|Vradi08g06540|Vradi07g28810|Vradi05g20770|Vradi0073s00400|Vradi0393s00080|Vradi07g21240
gmx00250	Alanine, aspartate and glutamate metabolism	9	0.11801	Vradi02g13720|novel.1618|novel.2603|Vradi0305s00100|Vradi01g05710|Vradi0343s00030|Vradi10g01300|novel.2352|Vradi0389s00050
gmx03030	DNA replication	9	0.123019	Vradi01g09940|Vradi05g09380|Vradi06g02210|Vradi03g06470|Vradi10g03240|Vradi02g03080|Vradi0051s00470|Vradi06g12310|Vradi07g17560
gmx00100	Steroid biosynthesis	6	0.125498	Vradi07g13020|Vradi02g02520|Vradi02g07050|Vradi0154s00310|Vradi05g11270|novel.47
gmx00400	Phenylalanine, tyrosine and tryptophan biosynthesis	7	0.128301	Vradi08g12900|Vradi10g05180|Vradi02g10450|Vradi0305s00100|Vradi01g07920|Vradi0043s00720|Vradi07g16190
gmx00565	Ether lipid metabolism	5	0.134697	Vradi05g05460|Vradi01g03050|Vradi07g00240|Vradi05g20910|Vradi0154s00310
gmx00052	Galactose metabolism	9	0.144165	Vradi08g11570|Vradi05g21070|Vradi11g01590|Vradi0635s00020|Vradi04g05350|Vradi07g28810|Vradi05g20770|Vradi08g02400|Vradi03g07380
gmx02010	ABC transporters	6	0.185519	Vradi01g13150|Vradi03g03670|Vradi03g02390|Vradi09g06330|novel.2473|Vradi01g13160
gmx00051	Fructose and mannose metabolism	10	0.202634	Vradi04g05360|Vradi11g01590|Vradi10g07790|Vradi02g04050|Vradi08g06540|Vradi07g28810|Vradi05g20770|Vradi11g05890|Vradi0393s00080|Vradi05g13370
gmx00073	Cutin, suberine and wax biosynthesis	5	0.205752	Vradi03g01380|Vradi08g01600|Vradi06g06960|Vradi03g01370|Vradi10g03420
gmx00750	Vitamin B6 metabolism	3	0.213727	Vradi07g01820|Vradi05g20890|Vradi09g09800
gmx00562	Inositol phosphate metabolism	10	0.21485	novel.1970|Vradi05g05460|novel.3433|Vradi07g00240|novel.891|Vradi06g04520|Vradi10g07520|Vradi06g15610|novel.1719|Vradi07g14010
gmx00600	Sphingolipid metabolism	4	0.21776	Vradi10g03210|Vradi04g05350|Vradi07g27370|Vradi10g11000
gmx00195	Photosynthesis	9	0.230705	Vradi08g18590|Vradi0381s00060|Vradi08g08520|Vradi09g05500|Vradi0315s00210|Vradi02g10550|Vradi01g13100|Vradi0189s00020|novel.2583
gmx00780	Biotin metabolism	3	0.242356	Vradi04g00920|Vradi06g07280|Vradi02g06790
gmx00230	Purine metabolism	13	0.243136	Vradi03g04110|Vradi10g04130|novel.2240|Vradi08g08040|Vradi07g11820|Vradi03g03550|Vradi09g06630|Vradi01g00090|Vradi05g18750|Vradi08g18320|Vradi0007s01110|novel.1618|Vradi08g16180
gmx04146	Peroxisome	11	0.24792	Vradi07g19010|Vradi11g11240|Vradi05g06710|Vradi0149s00060|Vradi06g02920|Vradi0442s00020|Vradi05g21940|Vradi08g15680|Vradi05g18990|Vradi01g11610|Vradi08g01600
gmx00945	Stilbenoid, diarylheptanoid and gingerol biosynthesis	4	0.252666	novel.1781|Vradi10g00130|novel.1641|Vradi08g21470
gmx00330	Arginine and proline metabolism	9	0.279804	Vradi02g04470|Vradi08g20150|Vradi07g01600|Vradi01g01630|Vradi0305s00100|Vradi07g14910|Vradi05g17060|Vradi01g07880|Vradi09g09060
gmx01210	2-Oxocarboxylic acid metabolism	7	0.302148	Vradi08g15420|Vradi0305s00100|Vradi11g03850|Vradi01g09410|Vradi07g01800|novel.343|Vradi06g02080
gmx00630	Glyoxylate and dicarboxylate metabolism	9	0.30908	Vradi06g08180|Vradi03g06920|Vradi07g24760|Vradi06g02080|Vradi11g03080|Vradi05g18990|Vradi07g26380|Vradi10g03910|Vradi01g00840
gmx00603	Glycosphingolipid biosynthesis - globo and isoglobo series	2	0.329464	Vradi05g18560|Vradi04g05350
gmx00908	Zeatin biosynthesis	4	0.337462	Vradi05g02400|novel.1552|Vradi05g13490|novel.923
gmx00670	One carbon pool by folate	3	0.345599	Vradi06g08180|Vradi11g03080|Vradi03g06920
gmx03410	Base excision repair	5	0.349814	Vradi06g10540|Vradi05g18610|Vradi10g03240|Vradi0129s00030|Vradi05g20110
gmx00785	Lipoic acid metabolism	1	0.35504	Vradi0086s00180
gmx00604	Glycosphingolipid biosynthesis - ganglio series	1	0.35504	Vradi05g18560
gmx00290	Valine, leucine and isoleucine biosynthesis	3	0.360401	novel.343|Vradi08g15420|Vradi11g03850
gmx00966	Glucosinolate biosynthesis	1	0.482049	Vradi08g15420
gmx00480	Glutathione metabolism	10	0.493585	Vradi09g01700|Vradi11g02190|Vradi08g02660|Vradi08g10080|Vradi07g14910|Vradi08g08500|Vradi0007s01110|Vradi06g02400|Vradi08g09640|Vradi0309s00020
gmx00999	Biosynthesis of secondary metabolites - unclassified	2	0.497931	Vradi11g08340|Vradi08g21470
gmx00380	Tryptophan metabolism	5	0.507917	Vradi02g04470|Vradi03g02630|Vradi07g24760|Vradi11g09740|Vradi07g26380
gmx00020	Citrate cycle (TCA cycle)	6	0.518792	Vradi07g24760|Vradi05g18400|Vradi06g02080|Vradi07g00470|Vradi07g01800|Vradi0433s00010
gmx00531	Glycosaminoglycan degradation	2	0.531619	Vradi05g03430|Vradi05g18560
gmx00660	C5-Branched dibasic acid metabolism	1	0.535844	Vradi08g15420
gmx04144	Endocytosis	18	0.572509	Vradi10g07700|novel.432|Vradi07g11870|Vradi08g02100|Vradi05g20910|Vradi05g17360|Vradi07g28290|Vradi06g09260|novel.1970|Vradi09g01230|Vradi04g11270|Vradi07g01710|Vradi02g04920|novel.1397|Vradi01g02850|Vradi01g10600|Vradi09g09490|Vradi0179s00300
gmx00310	Lysine degradation	4	0.593133	Vradi02g04470|Vradi07g24760|Vradi03g09720|Vradi07g26380
gmx00261	Monobactam biosynthesis	1	0.606247	Vradi01g09410
gmx04933	AGE-RAGE signaling pathway in diabetic complications	2	0.608856	Vradi06g04520|Vradi01g03860
gmx03430	Mismatch repair	4	0.61349	Vradi10g03240|Vradi06g12310|Vradi07g17560|Vradi01g09940
gmx00240	Pyrimidine metabolism	6	0.614218	novel.2240|Vradi03g04460|novel.2352|Vradi0007s01110|Vradi07g02350|Vradi07g13450
gmx00770	Pantothenate and CoA biosynthesis	3	0.627207	Vradi08g14410|Vradi11g03850|novel.343
gmx00740	Riboflavin metabolism	2	0.636912	novel.232|Vradi0023s00620
gmx00220	Arginine biosynthesis	3	0.638391	Vradi09g09060|novel.2603|Vradi0305s00100
gmx03440	Homologous recombination	5	0.648197	Vradi06g16190|Vradi08g10670|Vradi06g12310|Vradi07g17560|Vradi06g04150
gmx00760	Nicotinate and nicotinamide metabolism	2	0.650336	Vradi03g04460|novel.2047
gmx04130	SNARE interactions in vesicular transport	4	0.661525	Vradi01g09620|Vradi01g11590|novel.2173|novel.1273
gmx00903	Limonene and pinene degradation	1	0.665974	Vradi02g04470
gmx00300	Lysine biosynthesis	1	0.700671	Vradi01g09410
gmx04712	Circadian rhythm - plant	5	0.711715	Vradi0007s00340|Vradi03g06970|novel.662|Vradi07g08690|Vradi0209s00010
gmx04070	Phosphatidylinositol signaling system	6	0.711879	novel.1970|Vradi02g10620|Vradi06g04520|Vradi06g15610|novel.1719|Vradi10g07520
gmx00905	Brassinosteroid biosynthesis	1	0.731765	Vradi06g04560
gmx00860	Porphyrin and chlorophyll metabolism	4	0.744873	Vradi06g08000|Vradi06g00200|Vradi05g12870|Vradi08g03870
gmx04075	Plant hormone signal transduction	34	0.762656	Vradi08g08900|Vradi11g01700|Vradi08g21520|Vradi10g11830|Vradi03g01560|Vradi03g08350|Vradi10g11840|novel.1946|Vradi05g09300|Vradi11g04380|Vradi03g06970|Vradi08g08890|Vradi08g07080|Vradi10g10110|Vradi03g08760|Vradi05g15250|Vradi05g15360|Vradi05g13790|Vradi0198s00180|Vradi09g01030|Vradi07g20250|novel.2730|Vradi09g02660|Vradi03g00420|Vradi07g23660|Vradi11g03350|Vradi01g05270|Vradi06g16720|novel.2034|…
gmx03020	RNA polymerase	3	0.806589	novel.135|novel.1731|Vradi01g03920
gmx00514	Other types of O-glycan biosynthesis	1	0.806978	Vradi03g02460
gmx04141	Protein processing in endoplasmic reticulum	17	0.840342	Vradi02g08580|novel.432|Vradi0086s00580|Vradi0051s00020|novel.1606|novel.3042|Vradi05g21800|Vradi06g01660|Vradi05g03600|Vradi09g00710|Vradi02g01230|Vradi11g05330|Vradi01g13880|Vradi0406s00010|novel.1831|novel.1833|Vradi10g10920
gmx04120	Ubiquitin mediated proteolysis	9	0.862819	Vradi09g04420|Vradi03g05310|Vradi02g01890|Vradi05g09700|Vradi11g01210|Vradi0184s00330|Vradi0108s00100|Vradi03g08140|Vradi06g11640
gmx00053	Ascorbate and aldarate metabolism	3	0.879105	Vradi02g04470|Vradi10g05650|Vradi10g07520
gmx00563	Glycosylphosphatidylinositol (GPI)-anchor biosynthesis	1	0.88847	Vradi0606s00010
gmx03420	Nucleotide excision repair	4	0.911941	Vradi10g03240|Vradi06g12310|Vradi07g17560|Vradi01g09940
gmx00340	Histidine metabolism	1	0.919751	Vradi02g04470
gmx03018	RNA degradation	7	0.93487	novel.3462|Vradi01g06780|Vradi03g03980|Vradi02g07450|Vradi07g28810|Vradi05g20770|Vradi08g01180
gmx00790	Folate biosynthesis	1	0.939004	Vradi07g03590
gmx03008	Ribosome biogenesis in eukaryotes	5	0.941087	novel.2109|Vradi07g19900|novel.1034|novel.1836|novel.2796
gmx00190	Oxidative phosphorylation	8	0.955305	Vradi0381s00060|Vradi11g03470|Vradi01g13100|Vradi07g00470|novel.3261|novel.1477|Vradi03g03480|Vradi07g07110
gmx00970	Aminoacyl-tRNA biosynthesis	4	0.955476	novel.2978|Vradi06g13610|Vradi05g08580|Vradi08g09080
gmx03015	mRNA surveillance pathway	7	0.965635	Vradi02g03760|Vradi03g03980|Vradi01g05880|Vradi07g00230|novel.2134|novel.1713|Vradi08g22070
gmx03013	RNA transport	9	0.975568	Vradi01g11620|novel.2174|novel.2395|Vradi02g09360|Vradi03g03980|novel.3073|Vradi07g19900|Vradi0043s00370|novel.3246
gmx03022	Basal transcription factors	1	0.994242	Vradi07g24390
gmx03050	Proteasome	1	0.997972	novel.2029
gmx03040	Spliceosome	4	0.999972	Vradi0246s00010|novel.432|Vradi02g02240|Vradi08g18040
gmx03010	Ribosome	10	0.999999	novel.1303|Vradi11g00330|novel.2725|novel.2536|Vradi06g04650|novel.1541|Vradi08g00550|Vradi04g02300|novel.2647|novel.2248

## Sheet: Supplementary Table 8
Supplementary Table 8 Weighted gene coexpression network analysis (WGCNA) in mungbean.
Module name	Number of total genes	Number of DEGs
blue	5065	1051
turquoise	5510	952
red*	886	155
green	921	152
brown	1280	128
pink*	466	119
grey60*	245	85
tan*	297	79
lightgreen	206	70
cyan	285	68
black	658	54
magenta	398	54
darkgrey	136	25
lightcyan	265	24
darkred	156	23
orange	132	22
purple	385	20
yellow	961	19
saddlebrown	88	13
paleturquoise*	78	15
darkmagenta	56	11
darkolivegreen	57	8
orangered4	40	8
midnightblue	277	7
sienna3	55	7
salmon	288	6
darkturquoise	147	5
darkorange	114	5
lightsteelblue1	38	5
white	98	4
mediumpurple3	39	3
violet	58	2
lightyellow	183	1
royalblue	173	1
darkgreen	152	1
yellowgreen	51	1
greenyellow	381	\
skyblue	91	\
steelblue	81	\
skyblue3	46	\
plum1	43	\
lightcyan1	35	\
grey#	170	51
Total	21091	3254
* The module related to Fusarium wilt resistance; # The module containing genes outside of any other modules.

## Sheet: Supplementary Table 9
Supplementary Table 9 KEGG pathway enrichment analysis of 453 DEGs in five modules related to Fusarium wilt resistance.
ID	Term	Count	p value	Gene ID
gmx01100	Metabolic pathways	184	4.01287e-83	Vradi02g04470 Vradi05g18560 Vradi05g17090 Vradi08g19260 Vradi01g11420 Vradi06g16610 Vradi11g03140 Vradi0267s00100 Vradi01g12320 Vradi07g19310 Vradi01g05710 novel.2333 novel.746 novel.2334 novel.1102 Vradi0353s00060 Vradi0321s00080 Vradi07g06770 Vradi01g07050 Vradi04g08750 Vradi09g06670 Vradi08g16170 Vradi06g02530 Vradi06g02850 novel.303 novel.638 novel.188 novel.330 novel.3477 Vradi07g01810 Vradi…
gmx01110	Biosynthesis of secondary metabolites	107	2.04584e-43	Vradi02g04470 Vradi05g17090 Vradi08g19260 Vradi01g11420 Vradi06g16610 Vradi11g03140 Vradi0267s00100 Vradi01g12320 Vradi07g19310 Vradi01g05710 novel.2333 novel.746 novel.2334 novel.1102 Vradi0353s00060 Vradi0321s00080 Vradi07g06770 Vradi01g07050 Vradi09g06670 Vradi08g16170 novel.638 novel.188 novel.330 novel.3477 Vradi07g01810 Vradi01g13260 Vradi06g01050 Vradi06g01110 Vradi06g07700 Vradi09g09020 V…
gmx00940	Phenylpropanoid biosynthesis	24	4.98907e-13	novel.2333 novel.746 novel.2334 novel.1102 Vradi0353s00060 Vradi0321s00080 Vradi07g06770 novel.1482 Vradi07g07280 novel.2244 novel.2028 novel.2030 Vradi09g06520 novel.900 Vradi03g05550 Vradi02g07980 novel.2441 Vradi01g06500 Vradi06g06610 novel.2442 Vradi07g24460 Vradi06g16430 Vradi10g05950 Vradi07g27100
gmx04075	Plant hormone signal transduction	22	4.57512e-08	novel.2516 novel.2966 Vradi05g02250 Vradi02g13930 Vradi03g01580 novel.741 Vradi03g06960 Vradi03g01230 Vradi03g03640 Vradi06g05470 Vradi08g02840 Vradi0452s00020 Vradi07g28440 Vradi05g13080 Vradi05g05150 Vradi05g20690 Vradi0023s00370 Vradi05g15250 Vradi06g15240 Vradi08g08900 Vradi05g20070 Vradi01g02140
gmx04141	Protein processing in endoplasmic reticulum	20	1.42347e-11	Vradi0379s00020 novel.886 Vradi09g00440 Vradi09g09610 Vradi01g12610 Vradi0253s00270 Vradi08g08320 Vradi08g03380 Vradi11g07040 novel.1700 novel.1606 Vradi10g01900 Vradi09g06700 novel.1831 Vradi0246s00120 Vradi06g07710 Vradi08g14570 Vradi03g07520 Vradi10g13080 Vradi01g02590
gmx01200	Carbon metabolism	20	7.67919e-09	Vradi06g16610 Vradi11g03140 Vradi0267s00100 Vradi01g12320 Vradi08g16170 Vradi07g01810 Vradi01g13260 Vradi06g01050 Vradi06g01110 Vradi06g07700 Vradi07g10290 Vradi09g01700 Vradi04g09810 Vradi05g18910 Vradi10g06140 novel.303 Vradi06g00700 Vradi05g23050 Vradi01g03640 Vradi01g00850
gmx00500	Starch and sucrose metabolism	18	1.93181e-10	Vradi08g19260 Vradi06g16610 novel.2333 novel.746 novel.2334 novel.1102 Vradi0353s00060 Vradi0321s00080 Vradi07g06770 Vradi01g07050 Vradi09g09020 Vradi09g02070 Vradi08g01350 Vradi10g06880 novel.3485 Vradi01g01770 Vradi07g12720 Vradi03g04380
gmx00520	Amino sugar and nucleotide sugar metabolism	16	1.39373e-09	Vradi08g19260 Vradi06g16610 Vradi05g18560 Vradi01g07050 Vradi01g13210 Vradi11g10440 Vradi0553s00040 Vradi05g15900 Vradi03g04560 Vradi0194s00080 Vradi01g07780 Vradi02g13710 Vradi0083s00220 Vradi07g01770 Vradi05g15830 Vradi0154s00090
gmx01230	Biosynthesis of amino acids	16	8.93501e-07	Vradi01g11420 Vradi07g19310 Vradi07g01810 Vradi01g13260 Vradi06g01050 Vradi06g01110 Vradi06g07700 Vradi0023s00160 Vradi07g10290 Vradi05g18910 Vradi10g06140 Vradi06g00700 Vradi06g08800 novel.753 novel.319 Vradi06g03750
gmx03013	RNA transport	15	4.09183e-08	Vradi0137s00220 novel.3246 Vradi07g28380 Vradi1140s00010 Vradi03g10280 Vradi08g06740 novel.3073 Vradi10g05250 Vradi06g15120 Vradi05g19890 Vradi01g04510 Vradi10g05270 Vradi09g09610 Vradi01g12610 Vradi0253s00270
gmx03010	Ribosome	14	0.000143633	novel.2443 Vradi07g24340 Vradi02g09970 novel.309 novel.2341 novel.1543 novel.1541 novel.1931 Vradi06g04550 Vradi01g00820 Vradi06g09880 Vradi01g06520 Vradi06g04440 Vradi02g06350 Vradi02g01800
gmx04144	Endocytosis	13	7.38712e-06	Vradi07g19250 novel.2167 Vradi08g08320 Vradi09g09490 Vradi0428s00040 Vradi02g05080 Vradi06g14290 Vradi06g08830 Vradi08g14770 Vradi06g09260 Vradi0171s00210 novel.2889 Vradi08g02100
gmx04626	Plant-pathogen interaction	13	4.82007e-05	Vradi06g15880 novel.1022 Vradi11g01910 Vradi05g06080 Vradi07g17510 novel.2033 Vradi04g02820 novel.2553 novel.88 Vradi0329s00030 Vradi01g02480 Vradi10g07710 Vradi06g11790
gmx04016	MAPK signaling pathway - plant	12	2.18439e-05	Vradi07g01770 Vradi05g15830 Vradi06g14090 novel.352 novel.2516 novel.2966 Vradi05g02250 Vradi02g13930 Vradi03g01580 Vradi11g01910 Vradi05g06080 Vradi07g17510
gmx00195	Photosynthesis	11	2.51133e-09	Vradi05g20400 Vradi08g08520 Vradi04g07720 Vradi09g05500 Vradi0315s00210 Vradi02g10550 Vradi01g13100 Vradi05g22090 Vradi06g02500 Vradi0189s00020 Vradi02g07510
gmx03040	Spliceosome	11	2.74117e-05	Vradi08g08320 Vradi0976s00010 novel.959 novel.3404 novel.1744 Vradi10g04340 Vradi05g16440 novel.2283 Vradi06g08580 Vradi10g01290 Vradi0134s00280
gmx00564	Glycerophospholipid metabolism	10	1.83795e-06	Vradi0576s00010 Vradi07g19250 Vradi0007s01990 novel.1795 Vradi07g27200 Vradi10g01810 Vradi11g03100 Vradi09g06670 Vradi0351s00030 Vradi08g20860
gmx00270	Cysteine and methionine metabolism	10	5.11669e-06	novel.3403 novel.3142 Vradi01g13260 Vradi05g01920 Vradi06g07700 Vradi06g01050 Vradi07g01810 Vradi06g01110 novel.496 novel.229
gmx00460	Cyanoamino acid metabolism	9	5.44447e-06	Vradi09g00400 novel.1102 novel.746 novel.2333 Vradi0353s00060 Vradi0321s00080 Vradi07g06770
gmx00230	Purine metabolism	9	1.09704e-05	Vradi03g06200 Vradi05g16790 novel.330 Vradi08g19260 Vradi04g08750 novel.638 Vradi09g06630 novel.188 Vradi11g04080
gmx04120	Ubiquitin mediated proteolysis	9	4.42278e-05	novel.29 Vradi08g03380 Vradi02g02840 Vradi06g02370 novel.1495 Vradi02g10750 Vradi05g15590 Vradi04g09960 Vradi06g08580
gmx00196	Photosynthesis - antenna proteins	8	6.08823e-10	Vradi01g09260 novel.937 Vradi09g09820 Vradi06g00580 Vradi03g10310 Vradi0170s00030 Vradi05g00260 Vradi02g10630
gmx02010	ABC transporters	7	9.85633e-07	Vradi05g19880 Vradi01g13150 novel.333 Vradi03g03670 Vradi08g07040 Vradi0259s00130 Vradi01g13160
gmx00410	beta-Alanine metabolism	8	1.93753e-06	Vradi02g04470 Vradi06g02530 Vradi0267s00100 Vradi01g05710 Vradi06g02850 Vradi05g17090 Vradi11g03140 novel.303
gmx03420	Nucleotide excision repair	8	5.13118e-06	novel.2035 novel.29 Vradi08g07590 Vradi09g00440 novel.886 Vradi01g12340 Vradi05g06760 novel.2582
gmx00071	Fatty acid degradation	7	1.28097e-05	Vradi02g04470 Vradi0442s00010 Vradi08g00700 Vradi05g06710 Vradi0267s00100 Vradi11g03140 novel.2011
gmx01212	Fatty acid metabolism	7	5.46803e-05	Vradi0442s00010 Vradi04g02510 Vradi03g00180 Vradi05g06710 Vradi0267s00100 Vradi11g03140 novel.2011
gmx04146	Peroxisome	7	0.000153421	Vradi0442s00010 Vradi05g06710 Vradi0267s00100 Vradi0464s00010 Vradi07g26760 Vradi11g03140 Vradi04g03170
gmx03018	RNA degradation	7	0.000848182	Vradi04g11460 Vradi0250s00070 Vradi11g00050 Vradi06g00700 Vradi10g02980 Vradi05g05030 Vradi08g01180
gmx00010	Glycolysis / Gluconeogenesis	7	0.00330164	Vradi02g04470 Vradi08g19260 Vradi05g18910 Vradi08g16170 Vradi06g00700 Vradi01g12320 Vradi06g16610
gmx00909	Sesquiterpenoid and triterpenoid biosynthesis	5	2.24438e-06	novel.426 novel.340 novel.424 novel.425 novel.1394
gmx00920	Sulfur metabolism	6	1.0563e-05	Vradi01g13260 Vradi06g07700 Vradi06g01050 Vradi07g01810 Vradi06g01110 Vradi11g04080
gmx00860	Porphyrin and chlorophyll metabolism	6	6.94656e-05	Vradi0184s00250 Vradi02g06370 Vradi06g08000 Vradi05g12870 Vradi06g09670 Vradi08g03870
gmx00130	Ubiquinone and other terpenoid-quinone biosynthesis	6	8.2468e-05	Vradi07g22350 novel.1482 Vradi08g01530 Vradi05g17030 Vradi05g08890 Vradi0230s00070
gmx03022	Basal transcription factors	6	8.2468e-05	novel.3429 novel.2035 Vradi04g09290 Vradi06g14750 Vradi01g12340 Vradi05g06760
gmx00030	Pentose phosphate pathway	6	0.000216457	Vradi08g19260 Vradi09g01700 Vradi04g09810 novel.1353 Vradi01g12320 Vradi10g06140
gmx03050	Proteasome	6	0.000216457	novel.1456 Vradi02g08780 Vradi07g28650 Vradi01g02130 Vradi06g15320 Vradi05g14980
gmx00240	Pyrimidine metabolism	6	0.000226593	Vradi05g17370 Vradi0160s00100 Vradi04g08750 Vradi06g02850 novel.2352 Vradi07g17850
gmx00561	Glycerolipid metabolism	6	0.00123042	Vradi02g04470 Vradi0576s00010 novel.1795 Vradi01g02730 Vradi0154s00090 Vradi0351s00030
gmx00730	Thiamine metabolism	5	2.42632e-05	novel.3477 novel.330 novel.188 Vradi0450s00010 novel.638
gmx03020	RNA polymerase	5	0.000316938	Vradi04g09930 Vradi01g03920 Vradi0268s00090 Vradi0253s00070 Vradi0122s00340
gmx00900	Terpenoid backbone biosynthesis	5	0.000718681	Vradi01g12290 novel.3477 novel.1876 Vradi0332s00020 Vradi10g01780
gmx00710	Carbon fixation in photosynthetic organisms	5	0.00268804	Vradi05g23050 Vradi05g18910 Vradi01g12320 Vradi01g03640 Vradi10g06140
gmx00562	Inositol phosphate metabolism	5	0.00296113	novel.1719 Vradi09g09470 Vradi06g04520 Vradi09g06670 Vradi06g04510
gmx00970	Aminoacyl-tRNA biosynthesis	5	0.00425602	Vradi02g01600 Vradi07g28170 Vradi07g28870 Vradi08g09080 Vradi09g09230
gmx00480	Glutathione metabolism	5	0.00876121	Vradi11g02190 Vradi04g08750 Vradi06g02400 Vradi09g01700 Vradi04g09810
gmx04933	AGE-RAGE signaling pathway in diabetic complications	4	0.000192148	Vradi09g09470 Vradi06g04520 Vradi07g01440 Vradi06g04510
gmx00770	Pantothenate and CoA biosynthesis	4	0.000975057	Vradi08g03550 Vradi07g19310 Vradi06g02850 Vradi0023s00160
gmx00100	Steroid biosynthesis	4	0.00103648	Vradi09g00470 novel.354 Vradi01g04390 novel.47
gmx00053	Ascorbate and aldarate metabolism	4	0.00473909	Vradi02g04470 novel.475 Vradi08g02850 Vradi06g01650
gmx00592	alpha-Linolenic acid metabolism	4	0.00610311	Vradi11g03140 Vradi0267s00100 novel.2011 Vradi10g01690
gmx00250	Alanine, aspartate and glutamate metabolism	4	0.00631706	Vradi06g08800 novel.2352 Vradi0160s00100 Vradi01g05710
gmx00052	Galactose metabolism	4	0.00746157	Vradi08g19260 Vradi09g09020 Vradi09g02070 Vradi06g16610
gmx04070	Phosphatidylinositol signaling system	4	0.0144639	novel.1719 Vradi09g09470 Vradi06g04520 Vradi06g04510
gmx03008	Ribosome biogenesis in eukaryotes	4	0.0301174	novel.2109 Vradi0137s00220 novel.1744 Vradi10g13030
gmx00620	Pyruvate metabolism	4	0.0445357	Vradi08g16170 Vradi02g04470 Vradi05g23050 Vradi01g03640
gmx03015	mRNA surveillance pathway	4	0.0820057	Vradi02g12140 Vradi01g14210 Vradi08g22860 novel.1685
gmx00190	Oxidative phosphorylation	4	0.0978279	Vradi07g29730 novel.3261 Vradi0309s00040 Vradi01g13100
gmx01040	Biosynthesis of unsaturated fatty acids	3	0.00338984	Vradi11g03140 Vradi0267s00100 Vradi03g00180
gmx00563	Glycosylphosphatidylinositol (GPI)-anchor biosynthesis	3	0.00338984	novel.1509 Vradi04g03000 Vradi11g07170
gmx00960	Tropane, piperidine and pyridine alkaloid biosynthesis	3	0.0046637	Vradi01g11420 Vradi03g08340 Vradi05g17090
gmx00591	Linoleic acid metabolism	3	0.00586509	novel.2529 novel.2723 Vradi10g01690
gmx00062	Fatty acid elongation	3	0.0061916	Vradi04g02510 Vradi06g15880 novel.1022
gmx00906	Carotenoid biosynthesis	3	0.0134302	Vradi0246s00090 Vradi05g17570 Vradi04g04580
gmx04136	Autophagy - other	3	0.0139586	novel.3149 Vradi07g21660 Vradi09g07840
gmx00640	Propanoate metabolism	3	0.0144987	Vradi11g03140 Vradi0267s00100 novel.303
gmx00310	Lysine degradation	3	0.0173752	Vradi02g04470 Vradi07g01320 Vradi08g07290
gmx00510	N-Glycan biosynthesis	3	0.0186084	Vradi02g01320 Vradi0379s00020 Vradi0111s00100
gmx00061	Fatty acid biosynthesis	3	0.0232978	Vradi05g06710 Vradi0442s00010 Vradi04g02510
gmx00380	Tryptophan metabolism	3	0.0240152	Vradi02g04470 Vradi05g04510 Vradi04g05240
gmx04712	Circadian rhythm - plant	3	0.0437553	Vradi08g00630 Vradi08g17720 Vradi0264s00190
gmx00051	Fructose and mannose metabolism	3	0.0682017	Vradi01g07050 Vradi01g12320 Vradi06g16610
gmx00040	Pentose and glucuronate interconversions	3	0.190958	Vradi11g09680 Vradi05g00150 Vradi0289s00090
gmx00300	Lysine biosynthesis	2	0.0116897	novel.319 novel.753
gmx00750	Vitamin B6 metabolism	2	0.0182385	novel.319 novel.753
gmx00514	Other types of O-glycan biosynthesis	2	0.0206944	novel.319 novel.753
gmx00511	Other glycan degradation	2	0.0232796	novel.319 novel.753
gmx00531	Glycosaminoglycan degradation	2	0.0232796	novel.319 novel.753
gmx00290	Valine, leucine and isoleucine biosynthesis	2	0.0317698	novel.319 novel.753
gmx00650	Butanoate metabolism	2	0.0348315	novel.319 novel.753
gmx00340	Histidine metabolism	2	0.0446579	novel.319 novel.753
gmx00565	Ether lipid metabolism	2	0.0463844	novel.319 novel.753
gmx00790	Folate biosynthesis	2	0.0535278	novel.319 novel.753
gmx00360	Phenylalanine metabolism	2	0.0553709	novel.319 novel.753
gmx00073	Cutin, suberine and wax biosynthesis	2	0.061031	novel.319 novel.753
gmx03410	Base excision repair	2	0.0897604	novel.319 novel.753
gmx00400	Phenylalanine, tyrosine and tryptophan biosynthesis	2	0.0985774	novel.319 novel.753
gmx00350	Tyrosine metabolism	2	0.131125	novel.319 novel.753
gmx01210	2-Oxocarboxylic acid metabolism	2	0.153165	novel.319 novel.753
gmx00280	Valine, leucine and isoleucine degradation	2	0.158157	novel.319 novel.753
gmx03440	Homologous recombination	2	0.160664	novel.319 novel.753
gmx03030	DNA replication	2	0.163179	novel.319 novel.753
gmx00330	Arginine and proline metabolism	2	0.227779	novel.319 novel.753
gmx04145	Phagosome	2	0.333115	novel.319 novel.753
gmx00604	Glycosphingolipid biosynthesis - ganglio series	1	0.0558102	Vradi05g18560
gmx00965	Betalain biosynthesis	1	0.0558102	Vradi01g06450
gmx00660	C5-Branched dibasic acid metabolism	1	0.095619	Vradi07g19310
gmx04122	Sulfur relay system	1	0.102089	Vradi05g15760
gmx00903	Limonene and pinene degradation	1	0.133754	Vradi02g04470
gmx00944	Flavone and flavonol biosynthesis	1	0.133754	Vradi0023s00080
gmx00603	Glycosphingolipid biosynthesis - globo and isoglobo series	1	0.139952	Vradi05g18560
gmx00999	Biosynthesis of secondary metabolites - unclassified	1	0.19378	novel.1482
gmx00590	Arachidonic acid metabolism	1	0.205278	Vradi11g02190
gmx00450	Selenocompound metabolism	1	0.205278	Vradi02g01600
gmx00430	Taurine and hypotaurine metabolism	1	0.216612	Vradi01g05710
gmx00670	One carbon pool by folate	1	0.233312	Vradi05g16790
gmx00600	Sphingolipid metabolism	1	0.260359	Vradi10g03210
gmx00945	Stilbenoid, diarylheptanoid and gingerol biosynthesis	1	0.276129	novel.1641
gmx00950	Isoquinoline alkaloid biosynthesis	1	0.286455	Vradi05g17090
gmx00908	Zeatin biosynthesis	1	0.311632	novel.1019
gmx00910	Nitrogen metabolism	1	0.377513	Vradi05g04090
gmx03430	Mismatch repair	1	0.420683	novel.2582
gmx04130	SNARE interactions in vesicular transport	1	0.441135	novel.1273
gmx00020	Citrate cycle (TCA cycle)	1	0.5229	Vradi08g16170
gmx00260	Glycine, serine and threonine metabolism	1	0.556009	Vradi05g17090
gmx00630	Glyoxylate and dicarboxylate metabolism	1	0.604282	Vradi01g00850

## Sheet: Supplementary Table 10
Supplementary Table 10 Information on 453 DEGs in five modules related to Fusarium wilt resistance.
Gene ID	Module	Gene length	Description	Type
Vradi1253s00010	pink	588	Peptidase	\
Vradi11g12420	pink	1396	Protein of unknown function (DUF1262)	\
Vradi11g12160	grey60	3397	Phosphate transporter PHO1 homolog	\
Vradi11g11270	grey60	2701	Extra-large guanine nucleotide-binding protein 1	\
Vradi11g11070	grey60	2133	\	\
Vradi11g10440	red	660	Alpha-L-arabinofuranosidase	\
Vradi11g09680	grey60	1446	Glycosyl hydrolases family 28	\
Vradi11g08820	red	1228	\	\
Vradi11g05080	tan	1241	Alpha/beta hydrolase family	\
Vradi11g04330	tan	1553	Alpha/beta hydrolase family	\
Vradi11g02190	red	1308	Probable phospholipid hydroperoxide glutathione peroxidase	oxidoreductase
Vradi11g00270	pink	234	\	\
Vradi1140s00010	red	711	\	\
Vradi10g12830	pink	6315	Peptidase family	\
Vradi10g11350	paleturquoise	2128	Transmembrane amino acid transporter protein	\
Vradi10g09630	red	2596	Peptidase inhibitor	\
Vradi10g07880	paleturquoise	2487	Protein kinase domain|PF13855:Leucine rich repeat	LRR-RK
Vradi10g07710	grey60	714	Cleavage site for pathogenic type III effector avirulence factor Avr	\
Vradi10g07260	grey60	393	Hydrophobic seed protein	\
Vradi10g03690	grey60	2853	Protein SMAX1-LIKE 7	\
Vradi10g03410	tan	2267	Major Facilitator Superfamily	\
Vradi10g03210	red	585	Neutral ceramidase	\
Vradi10g01720	paleturquoise	3651	UDP-glucoronosyl and UDP-glucosyl transferase	\
Vradi10g01550	pink	3465	TMV resistance protein; TIR domain	NLR
Vradi10g01460	red	1689	Cation/calcium exchanger protein	\
Vradi10g01110	grey60	1776	Protein of unknown function (DUF4005)	\
Vradi1037s00010	pink	570	Thylakoid lumenal protein	\
Vradi09g09820	tan	1459	Chlorophyll A-B binding protein	\
Vradi09g09760	pink	1463	\	\
Vradi09g09490	red	1194	Brefeldin A-inhibited guanine nucleotide-exchange protein 3	\
Vradi09g09070	pink	774	\	\
Vradi09g07540	grey60	834	\	\
Vradi09g06980	pink	3288	Disease resistance protein RPP5; NB-ARC domain; TIR domain	NLR
Vradi09g06630	pink	1734	OHCU decarboxylase	\
Vradi09g06520	grey60	1263	2OG-Fe(II) oxygenase superfamily	oxidoreductase
Vradi09g06040	grey60	669	Alpha/beta hydrolase family	\
Vradi09g05540	paleturquoise	1148	Homeobox-leucine zipper protein HAT3;HD-ZIP protein N terminus	Transcription factor
Vradi09g05500	tan	1041	Oxygen evolving enhancer protein 3 (PsbQ)	\
Vradi09g05120	grey60	1224	Acid phosphatase	\
Vradi09g04290	grey60	3618	Ferric-chelate reductase 2	oxidoreductase
Vradi09g02930	grey60	2332	Root phototropism protein	\
Vradi09g01700	tan	2193	Glucose-6-phosphate dehydrogenase	oxidoreductase
Vradi09g00400	red	1667	GMC oxidoreductase	oxidoreductase
Vradi08g20370	grey60	1105	Probable carbohydrate esterase	\
Vradi08g19580	tan	483	Ring finger domain	\
Vradi08g19120	red	846	Ethylene-responsive transcription factor; AP2 domain	Transcription factor
Vradi08g18480	red	1514	\	\
Vradi08g18440	red	2137	SPX domain-containing membrane protein	\
Vradi08g18390	grey60	3304	ATPase family associated with various cellular activities (AAA)	\
Vradi08g15800	pink	801	Putative RING-H2 finger protein	\
Vradi08g14410	red	1458	Protein of unknown function DUF89	\
Vradi08g10690	pink	2274	Probable beta-D-xylosidase 2	\
Vradi08g09080	pink	282	Isoleucine-tRNA ligase	\
Vradi08g08900	grey60	1426	Auxin-induced protein	\
Vradi08g08520	tan	906	Photosystem I reaction centre subunit IV / PsaE	\
Vradi08g07490	paleturquoise	2793	Leucine-rich repeat receptor-like protein kinase PXL2	LRR-RK
Vradi08g07280	grey60	2598	Peptidase inhibitor	\
Vradi08g06850	red	4327	Structural maintenance of chromosomes protein	\
Vradi08g05470	grey60	678	Germin-like protein	\
Vradi08g04370	pink	885	\	\
Vradi08g03870	tan	1943	7-hydroxymethyl chlorophyll a reductase	\
Vradi08g03180	pink	458	Peptidase inhibitor I9	\
Vradi08g03150	tan	1083	Ulp1 protease family	\
Vradi08g02760	grey60	738	\	\
Vradi08g02100	pink	980	Ras family	\
Vradi08g01990	red	522	Squamosa promoter-binding-like protein 14	Transcription factor
Vradi08g01920	red	1036	\	\
Vradi08g01790	pink	1785	Protein tyrosine kinase	Protein kinase
Vradi08g01590	red	1214	Histone-lysine N-methyltransferase	\
Vradi08g01180	pink	3288	Helicase associated domain (HA2)	\
Vradi08g00700	red	717	Enoyl-CoA delta isomerase	\
Vradi07g30680	tan	1323	BTB/POZ domain-containing protein	\
Vradi07g28340	red	1684	Polyol transporter	\
Vradi07g27580	red	741	Strigolactone esterase	\
Vradi07g27100	grey60	591	Peroxidase 42	oxidoreductase
Vradi07g24720	tan	225	\	\
Vradi07g24460	grey60	1207	Peroxidase	oxidoreductase
Vradi07g23640	red	303	\	\
Vradi07g22790	grey60	255	\	\
Vradi07g20940	red	1637	Probable protein phosphatase	\
Vradi07g19490	pink	1203	Probable zinc metalloprotease	\
Vradi07g14980	pink	1369	WAT1-related protein	\
Vradi07g13170	tan	1270	\	\
Vradi07g12720	pink	1635	Trehalose-phosphatase	\
Vradi07g09670	grey60	2324	Glycosyl hydrolases family 28	\
Vradi07g07280	red	1895	4-coumarate-CoA ligase-like 9	\
Vradi07g05710	grey60	2387	Protein of unknown function (DUF4005)	\
Vradi07g05440	grey60	1613	DnaJ homolog subfamily	\
Vradi07g05420	grey60	906	TMV resistance protein; TIR domain	NLR
Vradi07g04360	grey60	543	HD-ZIP protein ATHB-17	Transcription factor
Vradi07g03550	tan	462	\	\
Vradi07g02670	tan	351	\	\
Vradi07g02230	red	609	KIX domain	Transcription factor
Vradi07g02110	grey60	1303	Membrane transport protein	\
Vradi07g01810	red	678	Serine acetyltransferase	\
Vradi06g16340	tan	843	Thioredoxin-like protein	\
Vradi06g15430	pink	567	Transcription factor MYB44	Transcription factor
Vradi06g14610	pink	672	\	\
Vradi06g13740	grey60	1298	Mitochondrial carrier protein	\
Vradi06g13660	red	1947	L-type lectin-domain containing receptor kinase	Protein kinase
Vradi06g13360	pink	600	Ethylene-responsive transcription factor; AP2 domain	Transcription factor
Vradi06g12890	pink	1031	\	\
Vradi06g12870	red	1596	\	\
Vradi06g12780	pink	447	Cytochrome P450	oxidoreductase
Vradi06g12760	pink	3733	Kinesin-like protein	\
Vradi06g12020	red	1390	RNA polymerase sigma factor	\
Vradi06g12010	red	1062	Sugar efflux transporter for intercellular exchange	\
Vradi06g11490	red	1559	Glutathione S-transferase	\
Vradi06g11350	red	1851	Protein kinase domain	LRR-RK
Vradi06g10780	tan	2000	RNA polymerase sigma factor sigE	\
Vradi06g10540	pink	417	DNA-repair protein	\
Vradi06g10020	red	2614	OPT oligopeptide transporter protein	\
Vradi06g09380	red	1689	Protein NRT1/ PTR family	\
Vradi06g09260	pink	447	Clathrin heavy chain 2	\
Vradi06g09220	grey60	645	Glycolipid transfer protein	\
Vradi06g09120	red	1966	Probable glycosyltransferase	\
Vradi06g08220	tan	1083	MADS-box transcription factor 27	Transcription factor
Vradi06g08210	tan	1108	\	\
Vradi06g08050	pink	846	\	\
Vradi06g08000	tan	2215	Glutamyl-tRNAGlu reductase	oxidoreductase
Vradi06g07060	pink	1700	POT family	\
Vradi06g06610	red	753	Peroxidase	oxidoreductase
Vradi06g04520	red	2823	Phosphatidylinositol-specific phospholipase	\
Vradi06g04500	red	2391	Protein kinase domain	Protein kinase
Vradi06g04290	grey60	546	Protein of unknown function DUF260	\
Vradi06g03450	red	2020	Polygalacturonase-1 non-catalytic subunit beta	\
Vradi06g02510	pink	1072	Reticulon	\
Vradi06g02400	red	904	Glutathione S-transferase	\
Vradi06g02210	pink	1907	DNA primase small subunit	\
Vradi06g02140	red	2308	Glycosyl transferase family 8	\
Vradi06g01480	pink	930	GrpE	\
Vradi06g01310	tan	569	Glycerophosphoryl diester phosphodiesterase family	\
Vradi06g01110	red	1053	Serine acetyltransferase	\
Vradi06g00580	tan	690	Chlorophyll a-b binding protein	\
Vradi0656s00020	red	870	TBC1 domain family member	\
Vradi05g22930	tan	4575	G-type lectin S-receptor-like serine/threonine-protein kinase	Protein kinase
Vradi05g21910	tan	615	Bacterial trigger factor protein (TF)	\
Vradi05g21810	pink	1057	PLAC8 family	\
Vradi05g20640	grey60	897	non-haem dioxygenase in morphine synthesis N-terminal	oxidoreductase
Vradi05g20630	red	576	Cotton fibre expressed protein	\
Vradi05g20560	red	1057	NAD dependent epimerase/dehydratase family	\
Vradi05g20370	grey60	1554	Late embryogenesis abundant protein	\
Vradi05g19910	tan	369	\	\
Vradi05g19840	tan	572	Glyoxalase-like domain	\
Vradi05g19340	pink	1041	Per1-like	\
Vradi05g19260	grey60	1089	Feruloyl CoA ortho-hydroxylase 2	oxidoreductase
Vradi05g18560	grey60	1855	Glycosyl hydrolase family 20	\
Vradi05g18270	pink	459	VQ motif	\
Vradi05g17540	red	1851	G-type lectin S-receptor-like serine/threonine-protein kinase	Protein kinase
Vradi05g17310	red	2658	Putative disease resistance protein; NB-ARC domain	NLR
Vradi05g15830	red	957	Chitin recognition protein	\
Vradi05g15480	pink	504	DYW family of nucleic acid deaminases	\
Vradi05g15250	pink	864	Auxin responsive protein	\
Vradi05g12940	grey60	2118	POT family	\
Vradi05g12870	pink	1423	Uroporphyrinogen-III synthase	\
Vradi05g12180	grey60	1199	LIM domain-containing protein	\
Vradi05g09960	pink	1242	Plant protein of unknown function	\
Vradi05g09900	grey60	2250	Probable boron transporter	\
Vradi05g07480	red	1958	\	\
Vradi05g06710	grey60	2323	AMP-binding enzyme	\
Vradi05g06080	paleturquoise	3391	NADPH oxidase	oxidoreductase
Vradi05g04090	red	741	Carbonic anhydrase	\
Vradi05g01940	tan	1302	Adipocyte plasma membrane-associated protein	\
Vradi05g01760	red	573	\	\
Vradi05g00150	tan	2642	Pectinesterase 3	\
Vradi0544s00020	pink	735	Gamma-glutamyltranspeptidase	\
Vradi04g08610	pink	1768	PQQ-like domain	\
Vradi04g07660	grey60	1031	Auxin efflux carrier component 5	\
Vradi04g07450	red	1044	SAM dependent carboxyl methyltransferase	\
Vradi04g05200	pink	1649	KH domain-containing protein	\
Vradi04g04580	grey60	1929	Carotenoid cleavage dioxygenase	oxidoreductase
Vradi04g04260	pink	1410	UDP-glycosyltransferase	\
Vradi04g03790	pink	411	Cytochrome b5-like Heme/Steroid binding domain	\
Vradi04g03410	paleturquoise	2385	Nucleobase-ascorbate transporter 12	\
Vradi04g03210	red	1057	Phenazine biosynthesis-like protein	\
Vradi04g03130	pink	1727	Exostosin family	\
Vradi04g03090	pink	456	Myb-like DNA-binding domain	Transcription factor
Vradi04g02720	tan	1900	Protein indeterminate-domain 9	\
Vradi04g02580	pink	1524	POT family	\
Vradi04g02380	red	1788	Exocyst complex component	\
Vradi04g02360	pink	537	Heavy-metal-associated domain	\
Vradi04g02260	red	1185	DDE superfamily endonuclease	\
Vradi04g02250	grey60	507	C2H2-type zinc finger	\
Vradi04g02130	pink	605	\	\
Vradi04g02050	grey60	2620	Factor of DNA methylation 4	\
Vradi04g01980	red	1860	GRAS domain family	\
Vradi0452s00020	red	393	Auxin responsive protein	\
Vradi0450s00010	tan	1852	Thiamine thiazole synthase	oxidoreductase
Vradi0416s00010	red	1548	Peptidase	\
Vradi0410s00020	grey60	768	Protein kinase domain	Protein kinase
Vradi03g10310	tan	1268	Chlorophyll a-b binding protein	\
Vradi03g10210	pink	1409	Putative serine/threonine-protein kinase-like protein CCR3	Protein kinase
Vradi03g08470	grey60	2833	Peptidase inhibitor	\
Vradi03g05550	tan	1155	Peroxidase	oxidoreductase
Vradi03g04490	red	1434	Probable purple acid phosphatase	\
Vradi03g04420	red	1911	IQ domain-containing protein IQM3	\
Vradi03g03730	pink	2244	E3 ubiquitin-protein ligase RFWD3	\
Vradi03g03670	paleturquoise	3993	ABC transporter	\
Vradi03g02740	paleturquoise	2610	receptor-like serine/threonine-protein kinase ALE2	Protein kinase
Vradi03g02580	paleturquoise	2757	Leucine-rich repeat receptor-like protein kinase PXL2	LRR-RK
Vradi03g01580	pink	699	Ethylene-responsive transcription factor; AP2 domain	Transcription factor
Vradi03g01380	red	1386	Cytochrome P450 94A1	oxidoreductase
Vradi0380s00170	grey60	1715	Histone deacetylase domain	\
Vradi0361s00030	tan	1136	Histone-like transcription factor (CBF/NF-Y) and archaeal histone	Transcription factor
Vradi0351s00030	red	852	Acyltransferase	\
Vradi0337s00080	pink	1155	\	\
Vradi0330s00040	tan	2531	G-type lectin S-receptor-like serine/threonine-protein kinase	Protein kinase
Vradi0327s00070	pink	630	\	\
Vradi0327s00010	grey60	1344	RING-H2 finger protein	\
Vradi0315s00210	tan	621	Photosystem I reaction center subunit I	\
Vradi02g14160	pink	2448	G-type lectin S-receptor-like serine/threonine-protein kinase	Protein kinase
Vradi02g13750	tan	519	\	\
Vradi02g13670	paleturquoise	1936	COBRA-like protein	\
Vradi02g12510	tan	438	\	\
Vradi02g11650	grey60	3303	Receptor-like protein kinase; Leucine rich repeat	LRR-RK
Vradi02g10980	red	1651	Probable terpene synthase 2	\
Vradi02g10950	red	1512	\	\
Vradi02g10630	tan	1135	Chlorophyll A-B binding protein	\
Vradi02g10550	tan	648	\	\
Vradi02g09050	grey60	1749	Terpene synthase	\
Vradi02g07300	pink	1179	E3 ubiquitin-protein ligase	\
Vradi02g06580	paleturquoise	2479	Glucomannan 4-beta-mannosyltransferase	\
Vradi02g06360	red	1044	Zinc finger protein STOP1 homolog	\
Vradi02g04470	red	1392	Aldehyde dehydrogenase family	oxidoreductase
Vradi02g03380	grey60	1466	Glycosyl hydrolases family 17	\
Vradi02g02870	pink	1064	Ubiquitin-conjugating enzyme	\
Vradi02g01070	red	1802	Alpha/beta hydrolase family	\
Vradi02g01010	pink	3114	\	\
Vradi0289s00090	tan	1793	Probable pectinesterase/pectinesterase inhibitor	\
Vradi0278s00020	red	2510	G-type lectin S-receptor-like serine/threonine-protein kinase	Protein kinase
Vradi0275s00080	red	1145	\	\
Vradi0246s00310	red	2684	\	\
Vradi0223s00160	grey60	2136	HCO3- transporter family	\
Vradi0222s00050	paleturquoise	1047	Cyclin-D1-1	\
Vradi0216s00080	pink	795	\	\
Vradi01g14660	red	1105	CEN-like protein 1	\
Vradi01g14510	pink	612	Carboxylesterase	\
Vradi01g14320	red	2796	Leucine rich repeat N-terminal domain	LRR-RLP
Vradi01g14130	grey60	890	short chain dehydrogenase	oxidoreductase
Vradi01g13460	pink	1368	Plant protein of unknown function	\
Vradi01g13450	pink	329	\	\
Vradi01g13270	red	764	Kinesin-like protein KIN-6	\
Vradi01g13220	red	1775	Plant protein of unknown function	\
Vradi01g13210	tan	858	Acidic endochitinase	\
Vradi01g13160	red	4596	ABC transporter C family member	\
Vradi01g13150	red	4865	ABC transporter C family member	\
Vradi01g13100	red	585	ATP synthase	\
Vradi01g12830	pink	778	Kinesin-like protein KIN-6	\
Vradi01g12290	red	840	Polyprenyl synthetase	\
Vradi01g12120	red	787	\	\
Vradi01g11220	tan	1606	\	\
Vradi01g10180	red	1011	\	\
Vradi01g09260	tan	1314	Chlorophyll a-b binding protein	\
Vradi01g08160	red	1374	\	\
Vradi01g07840	grey60	2487	LRR receptor-like serine/threonine-protein kinase	LRR-RK
Vradi01g07780	grey60	2211	Glycosyl transferase family 8	\
Vradi01g07130	tan	1321	\	\
Vradi01g06100	red	1443	UDP-glycosyltransferase	\
Vradi01g06080	red	1209	UDP-glycosyltransferase	\
Vradi01g05710	tan	1745	Glutamate decarboxylase	\
Vradi01g05630	tan	1410	Carbohydrate-binding protein of the ER	\
Vradi01g05560	tan	519	ZF-HD protein dimerisation region	Transcription factor
Vradi01g04810	grey60	279	\	\
Vradi01g04710	grey60	684	\	\
Vradi01g04600	pink	762	NAC domain-containing protein 100	Transcription factor
Vradi01g03920	pink	548	RNA polymerase	\
Vradi01g03400	grey60	1143	NB-ARC domain	NLR
Vradi01g02480	pink	522	EF-hand domain pair	\
Vradi01g02360	tan	1047	Uncharacterized GPI-anchored protein	\
Vradi01g02170	paleturquoise	1622	Ring finger domain	\
Vradi01g01810	pink	1526	NAC domain-containing protein 9	Transcription factor
Vradi01g01770	red	3113	Granule-bound starch synthase 2	\
Vradi01g01600	pink	2629	AAA-ATPase	\
Vradi01g01400	pink	1597	3-dehydroquinate synthase	oxidoreductase
Vradi0198s00080	grey60	1732	Aspartyl protease	\
Vradi0194s00080	pink	3465	Polygalacturonate 4-alpha-galacturonosyltransferase	\
Vradi0189s00020	tan	1274	PsbP	\
Vradi0183s00170	red	396	\	\
Vradi0179s00340	tan	1301	Protein of unknown function (DUF4079)	\
Vradi0179s00280	grey60	369	Calcium-binding protein KIC	\
Vradi0179s00080	grey60	1581	Cytochrome P450	oxidoreductase
Vradi0170s00030	tan	1350	Chlorophyll a-b binding protein	\
Vradi0161s00200	tan	2058	NmrA-like family	\
Vradi0158s00120	red	1061	\	\
Vradi0158s00020	tan	348	Non-specific lipid-transfer protein	\
Vradi0129s00230	pink	555	MYB family transcription factor	Transcription factor
Vradi0111s00080	tan	3035	Respiratory burst NADPH oxidase	oxidoreductase
Vradi0086s00540	grey60	832	Uncharacterized GPI-anchored protein	\
Vradi0086s00150	grey60	1792	Protein of unknown function (DUF1421)	\
Vradi0083s01040	tan	1444	4Fe-4S dicluster domain	\
Vradi0083s00500	grey60	501	Myb-related protein Myb4	Transcription factor
Vradi0083s00220	grey60	837	\	\
Vradi0023s00400	grey60	444	Protein of unknown function (DUF640)	\
Vradi0023s00080	grey60	1371	UDP-glucoronosyl and UDP-glucosyl transferase	\
Vradi0007s00690	grey60	3609	POT family	\
novel.98	red	1388	\	\
novel.967	red	914	NLI interacting factor-like phosphatase	\
novel.96	tan	414	\	\
novel.95	red	10254	NB-ARC domain	NLR
novel.937	tan	1285	Chlorophyll A-B binding protein	\
novel.910	tan	8751	NB-ARC domain; Leucine rich repeat	NLR
novel.907	red	655	\	\
novel.874	red	2504	\	\
novel.872	red	214	\	\
novel.783	red	1715	\	\
novel.752	pink	1441	\	\
novel.728	red	7200	NB-ARC domain	NLR
novel.727	pink	4536	\	\
novel.717	pink	4405	RNA dependent RNA polymerase	\
novel.701	red	614	Ulp1 protease family	\
novel.70	grey60	3968	Protein tyrosine kinase	Protein kinase
novel.527	pink	900	\	\
novel.519	red	1290	\	\
novel.489	pink	768	\	\
novel.486	red	2715	\	\
novel.485	grey60	1903	Cytochrome P450	oxidoreductase
novel.47	red	507	Squalene-hopene cyclase C-terminal domain	\
novel.433	tan	2792	Dynamin family	\
novel.426	pink	483	Squalene-hopene cyclase C-terminal domain	\
novel.425	pink	248	\	\
novel.42	red	3459	XH domain	\
novel.38	red	1250	\	\
novel.377	pink	4663	ABC transporter	\
novel.376	red	4857	ABC transporter	\
novel.358	pink	1744	\	\
novel.3551	pink	\	\	\
novel.353	pink	1162	Leucine rich repeat N-terminal domain	LRR-RLP
novel.352	pink	1360	Protein kinase domain	Protein kinase
novel.3515	grey60	783	Cytochrome P450	oxidoreductase
novel.3512	grey60	818	Membrane transport protein	\
novel.351	red	2493	Universal stress protein family	\
novel.3422	red	326	\	\
novel.3416	pink	963	\	\
novel.3414	red	4319	\	\
novel.3413	red	1277	Transposase-associated domain	\
novel.339	pink	4837	Leucine rich repeat	LRR-RLP
novel.3374	tan	261	\	\
novel.332	pink	1310	\	\
novel.3272	red	517	Cytochrome P450	oxidoreductase
novel.3261	red	2421	\	\
novel.3257	pink	962	Hsp20/alpha crystallin family	\
novel.3255	red	1702	\	\
novel.3252	pink	2894	:gag-polypeptide of LTR copia-type	\
novel.3246	red	651	Ubiquitin-2 like Rad60 SUMO-like	\
novel.3210	tan	2156	UDP-glucoronosyl and UDP-glucosyl transferase	\
novel.3201	pink	3881	Leucine rich repeat N-terminal domain	LRR-RLP
novel.318	red	1635	Retrotransposon gag protein	\
novel.317	tan	3825	Leucine rich repeat	LRR-RLP
novel.312	pink	7120	Retrotransposon gag protein	\
novel.3118	red	500	\	\
novel.3114	grey60	535	TIR domain	NLR
novel.3110	pink	214	\	\
novel.310	red	2495	\	\
novel.308	red	4024	\	\
novel.3073	red	936	Elongation factor Tu domain 2	\
novel.3068	tan	2676	\	\
novel.305	tan	1480	\	\
novel.303	red	1327	\	\
novel.2942	red	600	\	\
novel.294	pink	873	Zinc-finger domain of monoamine-oxidase A repressor R1	\
novel.2925	pink	4392	mTERF	\
novel.2891	pink	920	\	\
novel.2853	red	801	\	\
novel.2841	red	338	\	\
novel.2825	red	788	\	\
novel.2823	paleturquoise	2978	\	\
novel.2814	tan	1989	\	\
novel.2804	tan	567	\	\
novel.2785	tan	227	\	\
novel.2763	pink	7108	NB-ARC domain	NLR
novel.2693	red	455	\	\
novel.2580	red	367	\	\
novel.258	tan	1214	\	\
novel.2553	red	2195	Protein kinase domain	Protein kinase
novel.2545	red	1379	\	\
novel.2503	grey60	757	\	\
novel.25	pink	1606	\	\
novel.2473	red	1876	\	\
novel.2365	tan	997	\	\
novel.2355	tan	261	WRKY DNA -binding domain	Transcription factor
novel.2352	pink	323	\	\
novel.2334	pink	3126	Transmembrane amino acid transporter protein	\
novel.2333	tan	4913	\	\
novel.2312	pink	6772	Domain of unknown function (DUF4216)	\
novel.2303	grey60	538	ABC-2 type transporter	\
novel.229	grey60	1635	2OG-Fe(II) oxygenase superfamily	oxidoreductase
novel.2288	red	4332	\	\
novel.2251	red	2212	\	\
novel.2244	red	723	Aldehyde dehydrogenase family	oxidoreductase
novel.2221	pink	1405	\	\
novel.2109	grey60	4999	Exonuclease	\
novel.2089	red	698	\	\
novel.2068	red	1032	Dirigent-like protein	\
novel.2062	pink	409	Probable N6-adenine methyltransferase	\
novel.2030	red	275	\	\
novel.2028	red	4269	Aldehyde dehydrogenase family	oxidoreductase
novel.2011	tan	2700	3-hydroxyacyl-CoA dehydrogenase	oxidoreductase
novel.200	pink	1136	\	\
novel.197	tan	3114	\	\
novel.1951	pink	2533	Protein tyrosine kinase	Protein kinase
novel.1926	red	433	\	\
novel.1876	red	1059	\	\
novel.1831	pink	1049	Hsp20/alpha crystallin family	\
novel.1830	pink	1276	Protein kinase domain	Protein kinase
novel.1828	red	1145	Domain of unknown function	\
novel.1826	red	1627	\	\
novel.182	pink	3533	\	\
novel.1815	tan	1325	\	\
novel.1795	pink	1729	Acyltransferase	\
novel.1778	red	1818	Cytochrome P450	oxidoreductase
novel.177	red	7447	Leucine rich repeat	LRR-RLP
novel.1719	red	728	Inositol-pentakisphosphate 2-kinase	\
novel.1694	pink	566	Cytochrome P450	oxidoreductase
novel.1669	pink	3522	Integrase zinc binding domain	\
novel.1656	tan	4931	NB-ARC domain	NLR
novel.1642	red	619	Exo70 exocyst complex subunit	\
novel.1641	red	421	Dimerisation domain	\
novel.162	red	2451	\	\
novel.1606	red	1902	UBX domain	\
novel.1602	grey60	736	\	\
novel.1585	red	3494	PPR repeat family	\
novel.1584	grey60	2638	Histone-like transcription factor (CBF/NF-Y) and archaeal histone	Transcription factor
novel.1553	red	219	\	\
novel.1541	red	2202	Ribosomal protein S21	\
novel.153	red	3081	\	\
novel.1505	tan	694	\	\
novel.1481	red	5075	\	\
novel.148	red	2437	Calcineurin-like phosphoesterase	\
novel.1473	red	863	\	\
novel.1453	grey60	1406	Tetratricopeptide repeat	\
novel.1394	grey60	1848	Terpene synthase family	\
novel.1371	grey60	4298	PPR repeat family	\
novel.1369	red	1626	EamA-like transporter family	\
novel.1352	pink	739	\	\
novel.1341	red	402	\	\
novel.1333	red	519	\	\
novel.1295	grey60	2471	Cytochrome P450	oxidoreductase
novel.1273	tan	1421	SNARE domain	\
novel.1257	pink	1301	\	\
novel.124	tan	3070	NB-ARC domain	NLR
novel.122	pink	1791	UDP-glucoronosyl and UDP-glucosyl transferase	\
novel.1201	pink	1237	Got1/Sft2-like family	\
novel.1152	red	611	\	\
novel.1118	grey60	1961	Core histone H2A/H2B/H3/H4	\
novel.1116	pink	2327	Protein tyrosine kinase	Protein kinase
novel.1101	grey60	437	WRKY DNA -binding domain	Transcription factor
novel.1092	pink	2500	MatE	\
novel.1063	red	2602	\	\
novel.1022	pink	1762	FAE1/Type III polyketide synthase-like protein	\
novel.1021	red	547	\	\
novel.1018	red	1111	Oxidoreductase family, NAD-binding Rossmann fold	oxidoreductase
novel.1017	pink	2596	Oxidoreductase family, NAD-binding Rossmann fold	oxidoreductase
ENSRNA050005902	red	274	\	\
NLR, nucleotide-binding leucine-rich repeat receptor; LRR-RK, leucine-rich repeat receptor kinases; LRR-RLP, leucine-rich repeat receptor-like protein
Bold, 27 candidate DEGs.

[truncated: 1 more sheets: Supplementary Table 11]
